# Supplementary material for: Voices from low-income and middle-income countries: a systematic review protocol of primary healthcare interventions within public health systems addressing intimate partner violence against women
Source: PubMed Central journal article supplement — BMJ Open. 2018 Mar 25;8(3):e019266. doi: 10.1136/bmjopen-2017-019266 (PMC5875662; doi:10.1136/bmjopen-2017-019266), 2018-03-25
Supplement: bmjopen-2017-019266.draft_revisions.pdf [file bmjopen-2017-019266.draft_revisions.pdf]

# BMJ Open

BMJ Open is committed to open peer review. As part of this commitment we make the peer review history of every article we publish publicly available.

When an article is published we post the peer reviewers' comments and the authors' responses online. We also post the versions of the paper that were used during peer review. These are the versions that the peer review comments apply to.

The versions of the paper that follow are the versions that were submitted during the peer review process. They are not the versions of record or the final published versions. They should not be cited or distributed as the published version of this manuscript.

BMJ Open is an open access journal and the full, final, typeset and author-corrected version of record of the manuscript is available on our site with no access controls, subscription charges or pay-per-view fees (<http://bmjopen.bmj.com>).

If you have any questions on BMJ Open's open peer review process please email [info.bmjopen@bmj.com](mailto:info.bmjopen@bmj.com)

# BMJ Open

## Voices from low-and-middle-income countries: a systematic review protocol of primary health care interventions within public health systems addressing intimate partner violence against women

|                                 |                                                                                                                                                                                                                                                                                                                                                                                                                                                                                                                                                                      |
|---------------------------------|----------------------------------------------------------------------------------------------------------------------------------------------------------------------------------------------------------------------------------------------------------------------------------------------------------------------------------------------------------------------------------------------------------------------------------------------------------------------------------------------------------------------------------------------------------------------|
| Journal:                        | <i>BMJ Open</i>                                                                                                                                                                                                                                                                                                                                                                                                                                                                                                                                                      |
| Manuscript ID                   | bmjopen-2017-019266                                                                                                                                                                                                                                                                                                                                                                                                                                                                                                                                                  |
| Article Type:                   | Protocol                                                                                                                                                                                                                                                                                                                                                                                                                                                                                                                                                             |
| Date Submitted by the Author:   | 21-Aug-2017                                                                                                                                                                                                                                                                                                                                                                                                                                                                                                                                                          |
| Complete List of Authors:       | Signorelli, Marcos; Universidade Federal do Parana, Collective Health<br>Hillel, Stav; La Trobe University - Melbourne Campus, Library<br>de Oliveira, Daniel; Universidade Federal do Rio Grande do Sul, Collective Health<br>Ayala Quintanilla, Beatriz; La Trobe University College of Science Health and Engineering, Judith Lumley Centre; Peruvian National Institute of Health, Lima<br>Hegarty, Kelsey; University of Melbourne, Dept of General Practice; The Royal Women's Hospital<br>Taft, Angela; La Trobe University, Mother and Child Health Research |
| <b>Primary Subject Heading</b>: | Public health                                                                                                                                                                                                                                                                                                                                                                                                                                                                                                                                                        |
| Secondary Subject Heading:      | Health services research, General practice / Family practice                                                                                                                                                                                                                                                                                                                                                                                                                                                                                                         |
| Keywords:                       | PUBLIC HEALTH, INTIMATE PARTNER VIOLENCE, LOW-AND-MIDDLE-INCOME COUNTRIES, PRIMARY CARE, SYSTEMATIC REVIEW                                                                                                                                                                                                                                                                                                                                                                                                                                                           |
|                                 |                                                                                                                                                                                                                                                                                                                                                                                                                                                                                                                                                                      |

SCHOLARONE™  
Manuscripts

**Title:** Voices from low-and-middle-income countries: a systematic review protocol of primary health care interventions within public health systems addressing intimate partner violence against women

**Authors:**

1. Signorelli, MC.

Ph.D in Public Health

Postdoctoral Fellow, La Trobe University

Lecturer, Federal University of Parana

Rua Jaguariaíva, 512. Matinhos/PR - Brazil

T:+55 41 3511 8326

E: [signorelli.marcos@gmail.com](mailto:signorelli.marcos@gmail.com)

2. Hillel, S.

Senior Learning Advisor (Library), La Trobe University

Plenty Road & Kingsbury Drive, Bundoora VIC 3086

T: 03 9479 6097

E: [s.hillel@latrobe.edu.au](mailto:s.hillel@latrobe.edu.au)

3. Oliveira, DC.

PhD in Health Sciences

Lecturer, Federal University of Rio Grande do Sul

Porto Alegre/RS, Brazil

T: +55 51 98344 5848

E: [daniel.canavese@gmail.com](mailto:daniel.canavese@gmail.com)

4. Ayala Quintanilla, BP.

Ph.D. candidate, Judith Lumley Centre, La Trobe University

Melbourne/VIC, Australia

T: 03 9479 8784

E: [17801497@students.latrobe.edu.au](mailto:17801497@students.latrobe.edu.au)

5. Hegarty K,

Ph.D in Preventive Medicine

Professor of Family Violence Prevention, The Royal Women's Hospital, Melbourne

Professor, Department of General Practice, The University of Melbourne

Melbourne/VIC, Australia

E: [k.hegarty@unimelb.edu.au](mailto:k.hegarty@unimelb.edu.au)

6. Taft A.

Ph.D in Public Health

1  
2  
3 Professor, Judith Lumley Centre, La Trobe University

4 Melbourne/VIC, Australia

5  
6 E: a.taft@latrobe.edu.au  
7

8  
9 Word count: 4498 (excluding title, abstract, strengths & limitations, references and appendixes)  
10  
11  
12  
13  
14  
15  
16  
17  
18  
19  
20  
21  
22  
23  
24  
25  
26  
27  
28  
29  
30  
31  
32  
33  
34  
35  
36  
37  
38  
39  
40  
41  
42  
43  
44  
45  
46  
47  
48  
49  
50  
51  
52  
53  
54  
55  
56  
57  
58  
59  
60

## ABSTRACT

**Introduction:** Intimate partner violence (IPV) considerably harms the health, safety, and wellbeing of women. In response, public health systems around the globe have been gradually implementing strategies. In particular, low- and middle-income countries (LMIC) have been developing innovative interventions in primary health care (PHC) addressing the problem. This paper describes a protocol for a systematic review of studies addressing the impacts/outcomes of PHC centre interventions addressing IPV against women from LMIC.

**Methods and analysis:** A systematic search for studies will be conducted in African Index Medicus, Africa Portal Digital Library, CINAHL, Embase, Index Medicus for the South-East Asia Region, IndMed, LILACS, Medecins Sans Frontieres, Medline, Minority Health and Health Equity Archive, ProQuest, PsychInfo, SciELO, and Social Policy and Practice. Studies will be in English, Spanish, and Portuguese, published between 2007 and 2017, addressing IPV against women from LMIC, whose data quantitatively report on the impacts/outcomes for survivors and/or workers and/or public health systems pre- and post-intervention. Two trilingual reviewers will independently screen for study eligibility and data extraction, and a librarian will cross check for compliance. Risk of bias and quality assessment of studies will be measured according to: (1) the Cochrane Collaboration's tool for assessing risk of bias for randomised controlled trials; and (2) the methodological index for non-randomised studies (MINORS). Data will be analysed and summarised using meta-analysis and narrative description of the evidence across studies. This systematic review will be reported according to the Preferred Reporting Items for Systematic Reviews and Meta-Analyses Protocols (PRISMA-P) guidelines.

**Ethics and dissemination:** This systematic review will be based on published studies, thus not requiring ethical approval. Findings will be presented in conferences and published in a peer-reviewed journal.

**Trial registration number:** International Prospective Register for Systematic Reviews (PROSPERO) number CRD42017069261

### Strengths and limitations of this study

- The comprehensive search strategy of this systematic review will allow identification of a range of interventions from different LMIC published in peer-reviewed journals in English, Spanish and Portuguese.
- This protocol is co-authored by researchers from LMIC, who are native-speakers of the languages included in this systematic review. This can strengthen the review process given linguistic and cultural aspects of the diverse studies will be recognised.
- The review intends to promote voices from LMIC, who otherwise may go unheard, given relative financial barriers of LMIC research institutions and the publication bias to English.
- It is expected that there will be some variability related to methodological diversity and outcomes of the reviewed studies, due to the broad scope of PHC interventions addressing IPV, making it challenging to compare outcomes across different scenarios.

## INTRODUCTION

Intimate partner violence (IPV) is the most prevalent type of violence against women. The World Health Organization (WHO) estimates that one in three women experience physical or sexual IPV during their lifetime<sup>1</sup>. IPV against women is defined by the WHO as any behaviour within an intimate relationship that causes physical damage, psychological or sexual abuse to a woman in the

relationship, including physical assault, psychological abuse, forced intercourse, and other forms of sexual coercion and of controlling behaviours<sup>2</sup>.

The consequences of IPV for women's health have been extensively described, demonstrating that abused women have poorer health compared to women who have never been abused<sup>3 4</sup>. There are a wide range of impacts, including: a) physical health, such as injuries, traumas, cardiovascular effects<sup>5</sup>; b) mental health, including depression, anxiety, post-traumatic stress disorder (PTSD), alcohol and drug abuse and suicide<sup>6</sup>; c) sexual and reproductive health, including sexually transmitted diseases (STD), miscarriage, reduced contraception and sexual autonomy<sup>7</sup>. The impacts are not only for women, but also for their children, including increased risk for low birth weight, preterm delivery, and neonatal death<sup>7</sup>.

IPV against women is a common problem all over the world, but multicountry studies reveal higher prevalence and the worst consequences for women from low-and-middle-income countries (LMIC)<sup>3</sup>. The World Bank classifies all countries by income, based on the gross national income (GNI) per capita<sup>8</sup>. It consists of four categories: 1) low-income (with a GNI per capita  $\leq$ US\$1,025 in 2015); 2) lower middle-income (GNI per capita between US\$1,026 and US\$4,035); 3) upper middle-income (GNI per capita between US\$4,036 and US\$12,475); and 4) high-income countries (GNI per capita US\$12,476). This classification is based on the gross national income (GNI) per capita of nations as of March, 2017. For the purpose of this review, we will include all categories, except the high-income, which is outside the scope of LMIC.

IPV has been recognized as a public health issue and included in the agendas of public health systems worldwide. The WHO Sustainable Development Goal number 5 aims to achieve gender equality and empower all women and girls. It includes two subitems targeting violence specifically: 5.1 'End all forms of discrimination against all women and girls everywhere'; and 5.2 'Eliminate all forms of violence against all women and girls in the public and private spheres, including trafficking and sexual and other types of exploitation'<sup>9</sup>. The World Health Assembly in 2016 recommended actions<sup>10</sup> under four strategic directions: 1) strengthening health system leadership and governance; 2) strengthening health service delivery and health workers'/providers' capacity to respond to violence, in particular against women and against children; 3) strengthen programming to prevent interpersonal violence, in particular against women and girls and against children; and 4) improve information and evidence. Each country responds differently to the problem in the health arena, and exchanging experiences can be a significant opportunity to foster local debate and action<sup>11</sup>. This systematic review focuses on experiences conducted within public health systems, and more specifically, in primary health care setting.

Primary health care (PHC) can be considered both a philosophy and a system response to reducing health inequities and ameliorating the effects of disadvantage<sup>12</sup>. PHC is the first level of contact individuals, families and communities have with the healthcare system. Ever since its definition was drawn up in 1978 by the WHO in the Alma-Ata declaration,<sup>13</sup> there has been much debate about the scope of PHC. In this study, we adopt a more recent definition of PHC, consisting of 'a socially appropriate, universally accessible, scientifically sound first level care provided by health services and systems with a suitably trained workforce comprised of multidisciplinary teams supported by integrated referral systems in a way that: gives priority to those most in need and addresses health inequalities; maximises community and individual self-reliance, participation and control; and involves collaboration and partnership with other sectors to promote public health'<sup>14</sup>.

Globally, numerous LMIC are developing innovative interventions addressing IPV against women with a focus on PHC<sup>15</sup>. However, some of these interventions often go unnoticed by mainstream researchers from high-income countries. This can be related to different factors, such as: 1) the high costs for the development of complex interventions considered the gold standard of research (e.g.: randomised controlled trials); 2) high publication costs in prestigious academic journals, accompanied by high standards which are difficult to achieve by LMIC researchers given scarce resources, and; 3) linguistic barriers, as writing papers in English—the dominant language for publication in prestigious journals of high income countries—can be very expensive for non-English speaking researchers. However, such interventions developed in LMIC are not necessarily low quality studies. Indeed, they

1  
2  
3 can be scalable and generalisable, affording insights for public health systems in other contexts,  
4 including both high-income countries and LMIC.

5 While previous reviews have been published in this area, they are either not systematic reviews<sup>16 17</sup>, or  
6 if systematic, did not focus solely on LMIC<sup>18</sup>, or if focusing on LMIC, did not make reference to  
7 PHC<sup>19</sup>. Moreover, none of the extant systematic reviews include studies in Spanish or Portuguese, nor  
8 searched regional databases for literature. Thus, this will be the first systematic review addressing IPV  
9 interventions in PHC from LMIC to include studies in English, Spanish, and Portuguese, retrieved  
10 from, amongst others, regional databases.

## 11 **REVIEW QUESTIONS**

- 12  
13 1) Do primary health care interventions within public health systems improve the health, safety and  
14 wellbeing of women survivors of IPV in LMIC?  
15 2) What are the main impacts/outcomes of these interventions for PHC workers and their  
16 sustainability for public health systems?  
17

## 18 **OBJECTIVES**

19 To conduct a systematic review of quantitative studies focusing on pre-and-post primary health care  
20 interventions conducted in LMIC, whose aim is the prevention/reduction of IPV and the improvement  
21 of survivors' health, safety and wellbeing.  
22

## 23 **METHODS**

24 This systematic review will be conducted and reported according to the guidelines of the Preferred  
25 Reporting Items for Systematic Reviews and Meta-Analysis Protocols (PRISMA-P)<sup>20 21</sup>, which  
26 includes the use of the PRISMA-P checklist (see appendix 1), following methodological approaches  
27 published in previous studies<sup>22</sup>. The review will be published according to the recommended items for  
28 systematic reviews based on the PRISMA statement<sup>22</sup>. This review will also be informed by the  
29 guidelines of the Cochrane Handbook<sup>23</sup> for systematic reviews of interventions to reinforce rigour  
30 along the process.  
31  
32  
33

## 34 **Study registration**

35 This systematic review is registered in the PROSPERO International Prospective Register of  
36 Systematic Reviews with number CRD42017069261.  
37 ([http://www.crd.york.ac.uk/PROSPERO/display\\_record.asp?ID=CRD42017069261](http://www.crd.york.ac.uk/PROSPERO/display_record.asp?ID=CRD42017069261))  
38  
39  
40  
41

## 42 **Types of studies**

43 In this review we will include studies with quantitative pre-and-post evaluation concerning PHC  
44 interventions of IPV against women from LMIC developed within their respective public health  
45 systems. For the purposes of this review, we will consider interventions as proposed by  
46 Blankenship<sup>24</sup>, consisting on actions generally taken by outsiders (often read experts), but including  
47 individuals and collectives who take actions on their own behalf, purposefully to address a particular  
48 risk or disease. This can include individual interventions (focused on individuals' knowledge,  
49 attitudes and behaviors) or structural interventions (aiming to change structural factors, such as  
50 economic, politico-legal, physical, and social environment). The interventions can include the  
51 following experimental approaches: randomised controlled trial, non-randomised controlled trial,  
52 quasi-experimental, and pre-post design. We will not include observational studies, qualitative  
53 methodologies, or prevalence studies.  
54  
55  
56  
57  
58  
59  
60

1  
2  
3 We license the inclusion of a broad type of interventions by acknowledging the relatively poor  
4 funding allotted to research in LMIC. While cognisant that RCTs, for example, are the gold standard  
5 in research, and further, that the Cochrane Collaboration largely recommends methodologically-  
6 randomised studies to be the focus of review, we argue that filtering solely for such studies would  
7 miss many interventions employed in LMIC - the economic capital in LMIC simply does not allow  
8 for it. Given our aim is to “hear voices for the LMIC,” and encouraged by the Cochrane’s recognition  
9 that non-RCTs may be more appropriate at times<sup>23</sup>, our approach is expansive.  
10

### 11 **Types of participants and settings**

12 We recognise that the definition of PHC can be considered both a utopia and an aim. For the purpose  
13 of this review, we will include any healthcare facility considered as a Primary Healthcare Centre, but  
14 restricted to public health services from LMIC. The WHO<sup>25</sup> defines Primary Healthcare Centres as  
15 centres providing services which are usually the first point of contact with a health professional. They  
16 include services provided by general practitioners, dentists, community nurses, pharmacists and  
17 midwives, among others. It can include, for example, General Practice Clinics, Community Based  
18 Units, Basic Health Units, Family Health Strategy, Primary Care Home Visits, Day Care Centres,  
19 Multicentre Health Clinics and One Stop Crisis Center. This review will not include studies of  
20 interventions conducted outside of PHC centres and from the public health systems, such as media  
21 campaigns, interventions in schools or in hospitals, which are considered tertiary level of care.  
22  
23

24 Interventions in PHC for IPV usually focus on workers’ strategies to improve survivors’ health. This  
25 can include healthcare professionals, paraprofessionals, managers and other workers, like  
26 receptionists, for example. By ‘survivors’<sup>10</sup> we mean any women older than 16 years-old affected by  
27 IPV and part of the population of an intervention of PHC centres from low- and middle-income  
28 countries.  
29  
30

### 31 **Intervention(s), exposure**

32 The types of interventions will include: studies about implementation of public policies to  
33 reduce/prevent IPV targeting PHC centres; education/training of PHC workers to manage IPV  
34 survivors; screening or case-finding IPV in PHC settings; strategies for organizational changes in  
35 PHC centres aiming to improve survivors' health, safety or wellbeing; therapeutic interventions for  
36 IPV focused in PHC centres.  
37  
38  
39  
40

### 41 **Comparator(s)/control**

42 Studies with all types of control conditions will also be included in this review, including no treatment  
43 group, treatment as usual, or comparison. We will not limit our review only to studies that compare  
44 active interventions with a control condition.  
45  
46  
47

### 48 **Types of outcomes measures**

#### 49 **Primary outcomes**

50 Primary outcomes will include the impacts/outcomes of the intervention for:

- 51 a) IPV, measured by validated instruments (such as the Composite Abuse Scale<sup>26</sup>, Index of Spouse  
52 Abuse<sup>27</sup>, etc.) or self-reported IPV (even if adopting unvalidated scale).
- 53 b) women’s perceived and diagnosed physical, psychological or sexual health and wellbeing, using  
54 validated instruments for each domain (such as General Health Questionnaire<sup>28</sup>, Center for  
55 Epidemiologic Studies Depression Scale - CESD<sup>29</sup> - Post Traumatic Stress Disorder Checklist<sup>30</sup>, the  
56  
57  
58  
59



1  
2  
3 Short-Form Health Survey - SF-36<sup>31</sup>, etc.).

4 c) women's safety, adopting validated or unvalidated measures (such as safety plans, danger  
5 assessment<sup>32</sup>, etc.).

6 d) PHC workers, including (i.) identification of abuse by workers; (ii.) information-giving or safety  
7 planning and (iii) referral to other services within the public health system (such as hospitals,  
8 emergency settings, etc.) (iv.) referral to other services beyond the public health (such as family  
9 violence support agencies, police, justice, housing, etc.);

10  
11 Other outcomes (secondary outcomes)

12 Secondary outcomes will include the impacts/outcomes of the intervention for:

13 a) children, considering intimate partner abuse also affects children, assessments through validated  
14 instruments regarding children's health and wellbeing will also be reviewed (such as Child Health  
15 Questionnaire – CHQ<sup>33</sup>, etc.).

16 b) public health systems, considering: (i.) policies about system and worker responses, (ii.) training  
17 programs in place, (iii.) routine data collection, (iv.) guidelines for workers, (v.) funding allocation  
18 and cost/benefit measures, and (vi.) sustainability, considering for this analysis only follow-up  
19 evaluations conducted no less than 12 months after the conclusion of the intervention.  
20  
21

## 22 **Search strategy**

23 A systematic search will be conducted for literature published between 1 January 2007 and 31 July  
24 2017. We choose this time range given the first multi-country study addressing our question in the  
25 context of LMIC was published in 2006<sup>3</sup>.  
26

27 The following databases will be searched: African Index Medicus, Africa Portal Digital Library,  
28 Cumulative Index to Nursing and Allied Health Literature (CINAHL), Embase, Index Medicus for the  
29 South-East Asia Region, IndMed, Latin American and Caribbean Health Science Information  
30 Database (LILACS), Medecins Sans Frontieres, Medline, Minority Health and Health Equity Archive,  
31 ProQuest, PsychInfo, Scientific Electronic Library Online (SciELO), Social Policy and Practice.  
32

33 This review considers studies published in English, Spanish, and Portuguese, given these are the  
34 official languages of 69 of the 145 LMIC (World Bank). Earlier systematic reviews<sup>19</sup> concerning  
35 interventions to IPV in LMIC did not consider articles in languages other than English. This review  
36 team consists of authors native in the three languages included, minimizing bias related to language.  
37 Accordingly, keywords and MeSH will be translated from English by author 1 and reviewed by  
38 authors 3 (to Portuguese) and 4 (to Spanish).

39 Authors 1 and 2 independently considered keywords and MeSH headings. Any discrepancies were  
40 subjected to justification. The general search strategy is shown in appendix 2, and will be adapted and  
41 modified appropriately according to each database.  
42

## 43 **Data collection and analysis**

### 44 **Eligibility criteria of the studies:**

45 The inclusion criteria will be:  
46

- 47 1. Studies from the eligible bibliographic databases with selected (combination of) terms and  
48 keywords (appendix 2), published in English, Spanish or Portuguese, between 2007 and 2017.
- 49 2. Interventions addressed to IPV conducted in PHC centres within the public health systems  
50 from LMIC.
- 51 3. Quantitative pre-and-post studies assessing the impacts/outcomes for survivors and/or  
52 workers and/or public health systems.
- 53 4. Primary data collection or existing data set analysis.  
54  
55  
56  
57  
58  
59  
60

1  
2  
3 The exclusion criteria will be:

- 4 1. Studies published in languages other than English, Spanish or Portuguese.
- 5 2. Interventions from non-LMIC or not-conducted in PHC centres or conducted only in the  
6 private health system.
- 7 3. Studies that did not quantitatively assess pre-and-post interventions or that did not describe  
8 the impacts/outcomes for survivors, workers or public health systems.
- 9 4. Studies not related to interventions for IPV against women (for example, studies that focus  
10 only in children abuse or studies that focus only in risk factors for IPV or association factors  
11 between clinical manifestations and IPV).
- 12 5. Grey literature, including any study protocols, theses, case reports, letters, opinions,  
13 editorials, weekly reports, policy documents, congress abstracts, theoretical papers,  
14 observational studies, qualitative studies or reviews.
- 15 6. Studies published in 2006 or earlier or with the full text not available in the eligible databases.
- 16 7. Duplicate studies that have used the same study population or data. In this case, it will be used  
17 only the most recent or relevant publication, for researches published in more than one  
18 journal.  
19  
20  
21

### 22 **Data management of the studies**

23  
24 COVIDENCE ([www.covidence.org](http://www.covidence.org)) will be employed to manage retrieved studies and to conduct the  
25 systematic review process. The bibliographic software platform Endnote (online version  
26 [www.myendnoteweb.com](http://www.myendnoteweb.com)) will also be used to manage and store relevant studies for this review.  
27 These softwares will remove duplicates thereby cleaning the sample. A checklist will be developed  
28 based on the eligibility criteria of this review. The flow diagram showing the main steps of this  
29 systematic review is available on Appendix 3, following the PRISMA statement<sup>20 21</sup>.

### 31 **Data selection of the studies**

32  
33 The first step consists of the screening of potential studies. This will be done independently and  
34 blinded by two investigators fluent in the three languages included in this review (Authors 1 and 3).  
35 They will analyse titles and abstracts, considering also full texts of all non-duplicate papers from the  
36 electronic search, assessing their eligibility. This process was previously described<sup>34</sup> for rigorous  
37 systematic reviews, considering it can be necessary to read and evaluate the studies in this initial step.  
38 Additionally, some papers may not describe precisely their abstracts, so this manual and detailed  
39 search is proposed to maximise the inclusion of studies. Following Ayala-Quintanilla and  
40 colleagues<sup>34</sup>, if there is uncertainty about the inclusion of a certain study in this step, that study will be  
41 temporarily included and will proceed to the next step for more evaluation. Considering all the  
42 selected databases provide an English version of their titles and abstracts, a librarian (Author 2) will  
43 cross-check this first step, comparing the independent results obtained from each investigator and  
44 ensuring that all steps were conducted in compliance with the protocol. If there is any uncertainty  
45 between the resultant studies, the librarian will seek for an opinion from one of the advisors (Authors  
46 5 and 6) that compose this review team.  
47

48  
49 The second step consists of examining the full version of all selected studies from the first step,  
50 concerning the selection criteria. Two investigators will analyse independently all the articles for each  
51 language. The librarian will double check it this process.

52  
53 The final list of selected studies will be reviewed independently. For each exclusion, justification will  
54 be documented. The results will be compared by the librarian, and any disagreements will be  
55 discussed and if necessary, consultation with a third author will occur to reach the consensus.

### 56 **Appraisal/assessment of the risk of bias of the included studies**

1  
2  
3 It is expected that eligible studies will vary according to their methodological approach. There is a  
4 vast range of tools to assess the quality and bias of studies. Nevertheless, evaluating such biases and  
5 qualities is a challenging task and there is no consensus to conduct it.

6 Grading of Recommendations, Assessment, Development and Evaluation (GRADE)<sup>35</sup> and the  
7 EQUATOR (Enhancing the Quality and Transparency of health Research) Network<sup>36</sup> provide support  
8 with guidelines and tools to evaluate the studies, rating up according to the level of evidence.  
9

10 In this review, to minimize the risk of bias and evaluate the quality of evidence of each article  
11 included, we will adopt: 1) the Cochrane Collaboration's tool for assessing risk of bias for randomised  
12 controlled trials<sup>37</sup>; 2) the Methodological index for non-randomised studies (MINORS)<sup>38</sup> to assess  
13 non-randomised interventional studies. This process will be independently performed by different  
14 authors (two authors for articles written in English, two for studies written in Portuguese, and two for  
15 articles in Spanish) and any disagreement will be discussed and resolved by a third author, if needed.  
16  
17

### 18 **Data extraction**

19 For this third step, three investigators (Authors 1, 3 and 4) will independently and blindly extract all  
20 data items (see appendix 4) of each included study with a standardised data collection form. The first  
21 author will extract data from studies in English and Portuguese. The third author will extract data  
22 from studies in Portuguese and Spanish, while the fourth author will collect from Spanish and  
23 English. All extracted data will be converted into English by authors for articles in Spanish or  
24 Portuguese, to allow the analysis by all authors in a common language for all. To guarantee that no  
25 errors will be made, the librarian (Author 2) will randomly cross-check these data. Any disagreements  
26 will be resolved by consensus between the two authors collecting each language and a third author  
27 (Author 5 or 6) can be arbitrator if consensus is not reached, following other systematic review  
28 protocols<sup>34</sup>.  
29

### 30 **Data items**

31 The descriptive items that will be collected are (see appendix 4): (1) general information and  
32 characteristics of the study, including the country/place, type of service where it was conducted, target  
33 participants and their main sociodemographic characteristics; (2) methodological characteristics,  
34 including the type of method and how data/information were collected, components that were  
35 analysed/; (3) impacts/outcomes for survivors, including IPV rates, women's health, safety and  
36 wellbeing and also impacts for their children; (4) impacts/outcomes for PHC workers, including types  
37 of workers, their roles and concerning measures; (5) impacts/outcomes for the public health systems,  
38 including measures of articulation with other levels of care (for example, hospitals, emergency units,  
39 intensive care units, etc) and other sectors beyond the public health (for example, housing, financing,  
40 police, justice, social services, etc), and also evaluation of costs and sustainability of the intervention.  
41 For items 3, 4 and 5, we will also collect information about barriers and facilitators for each of the  
42 three components (survivors, workers and systems), if available.  
43  
44  
45  
46  
47

### 48 **Data synthesis and analysis**

49 Data extracted will be analysed and summarised aiming to answer the research questions. Data will be  
50 summarised according to the outcomes: 1) for survivors, including their health, safety and wellbeing  
51 as well as impacts on IPV rates; 2) for PHC workers considering their role to improve survivors'  
52 health care, and 3) for public health systems, including evaluation of costs and sustainability.  
53

54 When appropriate, a meta-analysis can be conducted, if a sufficient number of trials are identified  
55 with sufficient homogeneity. The meta-analysis will be conducted with aggregate data, rather than at  
56 the individual participant level. Continuous and categorical variables will be summarised according to  
57  
58  
59

1  
2  
3 the presentation of data of each study. Dichotomous outcome data (yes/no experience of IPV) will be  
4 described as risk ratios with their 95% confidence intervals. It will also be indicated if those findings  
5 were adjusted for confounders. It is anticipated that there will be some variability of reporting  
6 impacts/outcomes of interventions across studies. In this case, a narrative description of the available  
7 evidence will be conducted instead. This will consider which results are significant and their  
8 association with the outcomes, based on data availability across studies.

9 This review will present the results reported in the original studies which implies that we will not  
10 reanalyse or recalculate the data if a study does not report appropriate results. However, as indicated  
11 previously, we will calculate data, where possible, using the original information from the study such  
12 as for IPV or women's health, safety and wellbeing. In addition, quantitative data from figures can be  
13 utilised if there is sufficient information reported/explained in the study. Additional data analysis can  
14 be made in order to assess the comparisons between studies, if possible.

15  
16 For duplicate studies that have used the same study population or data, the most recent or relevant  
17 publication will be utilised for studies published in more than one journal, if possible the data will be  
18 linked together.

19 In summary, data analysis will be performed according to the data availability of eligible studies, and  
20 statistical expertise will be consulted as needed. The software STATA (version 15) will be utilised for  
21 all the quantitative analyses.  
22

### 23 24 **Cochrane's recommendations for reviews in public health**

25  
26 This review will follow some of the Cochrane guidelines for reviews conducted in public health and  
27 health promotion scenarios. One of the key points is sustainability, referred by The Cochrane  
28 Collaboration Group<sup>23</sup> as an important aspect to be included in systematic reviews in public health  
29 contexts, because it is likely to increase the concern of policymakers, practitioners and funders. When  
30 sustainability was measured in eligible studies we will look for additional explanations about which  
31 outcomes were measured over what period. However, if it was not measured, but authors explore the  
32 potential for sustainability it will also be summarised.  
33

34 Another Cochrane<sup>23</sup> recommendation for systematic reviews in public health is the consideration of  
35 applicability and transferability. Applicability refers to how the findings of a given study or review  
36 can be translated into specific population or settings. Transferability is also referred as the potential  
37 for this translation occurs. If the reviewed studies mention these aspects, they will also be included in  
38 the analysis.  
39

### 40 **Economic evidences**

41  
42 Cochrane<sup>23</sup> recommends the review of economic evidences, because it provides additional  
43 information for decision makers, considering not only if a strategy or intervention works, but also  
44 whether its adoption will improve the use of resources. The economic issues are not the main  
45 objective of this review, therefore, it will not be an inclusion or exclusion criteria, but will compose  
46 an additional source of information when mentioned in the studies. We believe this information will  
47 be particularly important for LMIC and summary will be presented when described in eligible studies.  
48

### 49 **PRESENTING AND REPORTING THE RESULTS**

50  
51 The process of selection of eligible studies for the systematic review will follow the flow diagram  
52 according to guidelines of the PRISMA-P (appendix 1). The main steps of the review will include: the  
53 identification of studies, screening, evaluation according to inclusion/exclusion criteria and analysis of  
54 eligible studies. Results will be presented according to the outcomes: for survivors; for PHC workers;  
55 and for public health systems. Data will be summarized in tables depending on data from each study,  
56 but presenting first author's name, country, year of publication, study design, aims and main  
57  
58  
59

1  
2  
3 outcomes.

## 4 **POTENTIAL AMENDMENTS**

5  
6 This protocol is designed to guide with rigour all the steps of this systematic review. Amendments are  
7 not expected, but if necessary, just in case of any unexpected event, they will be reported in a detailed  
8 and consistent way, followed by appropriate justification. The same will be applied to any differences  
9 between the protocol and the review. In case of differences, they will be fully described in a specific  
10 section of the final review, providing rationale for them.  
11

## 12 **CONCLUSION AND IMPLICATIONS**

13  
14 Intimate partner violence is one of the main public health problems for women's health, safety and  
15 wellbeing. It requires effective and sustainable actions to reduce harm and life-threatening, targeting  
16 comprehensive interventions, particularly in primary health care settings in low-and-middle income  
17 contexts. This challenge is more severe in developing countries and exchanging effective  
18 interventions can be a coordinated way to foster debate and action. This review will systematise the  
19 knowledge previously produced, identifying research gaps and opportunities on interventions  
20 conducted in LMIC.  
21

22  
23 IPV is a potentially preventable issue, but its complexity requires the articulation of different sectors  
24 (including health systems, education, justice, among others), in different levels (highlighting the key  
25 potential role of the primary care level, but connecting to other levels), with collaboration of different  
26 actors (such as health professionals, managers, police, etc.) and with different targets (survivors,  
27 perpetrators, families, communities, etc.).  
28

29  
30 Facing this complex scenario, it is significant to recognize the limitations of this review, such as the  
31 types of studies included, that do not include all possible methodological approaches conducted in  
32 LMIC. Another limitation is the possible diversity of interventions, that can be challenging to be  
33 compared and systematised. It could be possible that other relevant studies will be excluded, since this  
34 review includes only studies published in English, Portuguese and Spanish. It is important to mention  
35 that the findings of this systematic review will be cautiously interpreted and the conclusions will be  
36 presented with parsimony, considering such limitations. This review will only focus in a 'tip of the  
37 iceberg', but it can raise questions for future studies with focus, for example, in other levels of care or  
38 in other sectors rather than the public health or even including other methodological approaches, such  
39 as qualitative studies, which have been extensively reported in LMIC.  
40

## 41 **ETHICS AND DISSEMINATION**

### 42 **Ethical issues**

43  
44 This systematic review is based on studies previously published and does not include collection of  
45 new primary data. Consequently, it is not necessary to obtain ethical evaluation.  
46

### 47 **Publication Plan**

48  
49 This review will be publicized in conferences (preliminary results) and the final article will be  
50 published in a peer-reviewed journal. We intend to publish both the protocol and the systematic  
51 review in open access journals, aiming to be accessible to investigators currently engaged in  
52 interventions in low-and-middle-income countries. This review affords a voice to researchers in the  
53 field of IPV who would otherwise go unheard, and provide greater insights into the range of possible  
54 interventions for nations facing comparable issues. It is expected that the final publication can support  
55 public systems and policies worldwide.  
56  
57  
58  
59  
60



### Author's contributions

MS conceived the review. SH, BQ and AT assisted on the design of the study protocol. MS and SH drafted the protocol paper and all authors edited the subsequent versions. AT critically revised the methodology. All authors have reviewed and approved the final version of the text.

**Funding:** This work was supported by the Brazilian CAPES Foundation which funded a scholarship for postdoctoral studies of the first author [Process number 88881.119273/2016-01]. The funder had no role on this protocol development.

**Competing interests:** none

### REFERENCES

1. World Health Organization (WHO). Global and regional estimates of violence against women: prevalence and health effects of intimate partner violence and non-partner sexual violence. Geneva: World Health Organization Department of Reproductive Health and Research, London School of Hygiene and Tropical Medicine, South African Medical Research Council., 2013.
2. Krug EG, Mercy JA, Dahlberg LL, et al. The world report on violence and health. *Lancet* 2002;360(9339):1083-8. doi: 10.1016/S0140-6736(02)11133-0
3. Garcia-Moreno C, Jansen HA, Ellsberg M, et al. Prevalence of intimate partner violence: findings from the WHO multi-country study on women's health and domestic violence. *Lancet* 2006;368(9543):1260-9. doi: 10.1016/S0140-6736(06)69523-8
4. Campbell JC. Health consequences of intimate partner violence. *Lancet* 2002;359(9314):1331-6. doi: 10.1016/S0140-6736(02)08336-8
5. Coker AL, Davis KE, Arias I, et al. Physical and mental health effects of intimate partner violence for men and women. *Am J Prev Med* 2002;23(4):260-8.
6. Dutton MA, Green BL, Kaltman SI, et al. Intimate partner violence, PTSD, and adverse health outcomes. *J Interpers Violence* 2006;21(7):955-68. doi: 10.1177/0886260506289178
7. Sarkar NN. The impact of intimate partner violence on women's reproductive health and pregnancy outcome. *J Obstet Gynaecol* 2008;28(3):266-71. doi: 10.1080/01443610802042415
8. World Bank Country and Lending Groups. Washington: World Bank, 2017.
9. United Nations. Transforming our world: the 2030 agenda for sustainable development. New York: United Nations, 2015:31.
10. Organization WH. Global plan of action to strengthen the role of the health system within a national multisectoral responseto address interpersonal violence, in particular against women and girls, and against children. In: research Dfrha, ed. Geneva: WHO, 2016:76.
11. Signorelli MC, Taft A, Pereira PP. Intimate partner violence against women and healthcare in Australia: charting the scene. *Cien Saude Colet* 2012;17(4):1037-48.
12. Keleher H. Why primary health care offers a more comprehensive approach to tackling health inequities than primary care. *Australian Journal of Primary Health* 2001;7(2):5.
13. Care ICOPH. Declaration of Alma-Ata. *WHO Chron* 1978;32(11):428-30.
14. Australian Primary Health Care Research Institute (APHCRI). What is primary health care? In: (APHCRI). Canberra: Australian Primary Health Care Research Institute (APHCRI), 2009.
15. Abramsky T, Devries K, Kiss L, et al. Findings from the SASA! Study: a cluster randomized controlled trial to assess the impact of a community mobilization intervention to prevent violence against women and reduce HIV risk in Kampala, Uganda. *BMC Med* 2014;12(1):122. doi: 10.1186/s12916-014-0122-5
16. Colombini M, Mayhew S, Watts C. Health-sector responses to intimate partner violence in low- and middle-income settings: a review of current models, challenges and opportunities. *Bull*

- 1  
2  
3 *World Health Organ* 2008;86(8):635-42.
- 4 17. Bacchus LJ, Colombini M, Contreras Urbina M, et al. Exploring opportunities for coordinated  
5 responses to intimate partner violence and child maltreatment in low and middle income  
6 countries: a scoping review. *Psychol Health Med* 2017;22(sup1):135-65. doi:  
7 10.1080/13548506.2016.1274410 [published Online First: 2017/02/02]
- 8 18. Bair-Merritt MH, Lewis-O'Connor A, Goel S, et al. Primary care-based interventions for intimate  
9 partner violence: a systematic review. *Am J Prev Med* 2014;46(2):188-94. doi:  
10 10.1016/j.amepre.2013.10.001
- 11 19. Bourey C, Williams W, Bernstein EE, et al. Systematic review of structural interventions for  
12 intimate partner violence in low- and middle-income countries: organizing evidence for  
13 prevention. *BMC Public Health* 2015;15:1165. doi: 10.1186/s12889-015-2460-4 [published  
14 Online First: 2015/11/23]
- 15 20. Moher D, Shamseer L, Clarke M, et al. Preferred reporting items for systematic review and meta-  
16 analysis protocols (PRISMA-P) 2015 statement. *Syst Rev* 2015;4:1. doi: 10.1186/2046-4053-  
17 4-1 [published Online First: 2015/01/01]
- 18 21. Shamseer L, Moher D, Clarke M, et al. Preferred reporting items for systematic review and meta-  
19 analysis protocols (PRISMA-P) 2015: elaboration and explanation. *BMJ* 2015;349:g7647.  
20 [published Online First: 2015/01/02]
- 21 22. Moher D, Liberati A, Tetzlaff J, et al. Preferred reporting items for systematic reviews and meta-  
22 analyses: the PRISMA statement. *J Clin Epidemiol* 2009;62(10):1006-12. doi:  
23 10.1016/j.jclinepi.2009.06.005 [published Online First: 2009/07/23]
- 24 23. Higgins J, Green S, editors. *Cochrane Handbook for Systematic Reviews of Interventions*. West  
25 Sussex: The Cochrane Collaboration and John Wiley & Sons, 2008.
- 26 24. Blankenship KM, Friedman SR, Dworkin S, et al. Structural interventions: concepts, challenges  
27 and opportunities for research. *J Urban Health* 2006;83(1):59-72. doi: 10.1007/s11524-005-  
28 9007-4
- 29 25. WHO Guidelines on Hand Hygiene in Health Care: First Global Patient Safety Challenge Clean  
30 Care Is Safer Care. Appendix 1 Definitions of health-care settings and other related terms.  
31 Geneva: World Health Organization, 2009.
- 32 26. Hegarty K, Fracgp, Bush R, et al. The composite abuse scale: further development and assessment  
33 of reliability and validity of a multidimensional partner abuse measure in clinical settings.  
34 *Violence Vict* 2005;20(5):529-47.
- 35 27. Campbell DW, Campbell J, King C, et al. The reliability and factor structure of the index of  
36 spouse abuse with African-American women. *Violence Vict* 1994;9(3):259-74.
- 37 28. Goldberg DP, Hillier VF. A scaled version of the General Health Questionnaire. *Psychol Med*  
38 1979;9(1):139-45.
- 39 29. Eaton W, Smith C, Ybarra M, et al. Center for Epidemiologic Studies Depression Scale: review  
40 and revision (CESD and CESD-R). In: Maruish M, ed. *The Use of Psychological Testing for*  
41 *Treatment Planning and Outcomes Assessment*. 3 ed. Mahwah, NJ: Lawrence Erlbaum  
42 Associates, Inc, 2004.
- 43 30. Lang AJ, Stein MB. An abbreviated PTSD checklist for use as a screening instrument in primary  
44 care. *Behav Res Ther* 2005;43(5):585-94. doi: 10.1016/j.brat.2004.04.005
- 45 31. Ware JE, Sherbourne CD. The MOS 36-item short-form health survey (SF-36). I. Conceptual  
46 framework and item selection. *Med Care* 1992;30(6):473-83.
- 47 32. Campbell JC. Nursing assessment for risk of homicide with battered women. *ANS Adv Nurs Sci*  
48 1986;8(4):36-51.
- 49 33. Landgraf J, Abetz L, Ware J. *The Child Health Questionnaire (CHQ) user's manual*. 1st ed. ed.  
50 Boston: TheHealth Institute, New England Medical Centre, 1996.
- 51 34. Ayala Quintanilla BP, Taft A, McDonald S, et al. Social determinants and maternal exposure to  
52 intimate partner violence of obstetric patients with severe maternal morbidity in the intensive  
53 care unit: a systematic review protocol. *BMJ Open* 2016;6(11):e013270. doi:  
54 10.1136/bmjopen-2016-013270 [published Online First: 2016/11/28]
- 55 35. Schünemann HJ, Schünemann AH, Oxman AD, et al. Grading quality of evidence and strength of  
56 recommendations for diagnostic tests and strategies. *BMJ* 2008;336(7653):1106-10. doi:  
57 10.1136/bmj.39500.677199.AE

- 1  
2  
3 36. Pandis N, Fedorowicz Z. The international EQUATOR network: enhancing the quality and  
4 transparency of health care research. *J Appl Oral Sci* 2011;19(5)  
5 37. Higgins JP, Altman DG, Gøtzsche PC, et al. The Cochrane Collaboration's tool for assessing risk  
6 of bias in randomised trials. *BMJ* 2011;343:d5928. [published Online First: 2011/10/18]  
7 38. Slim K, Nini E, Forestier D, et al. Methodological index for non-randomized studies (minors):  
8 development and validation of a new instrument. *ANZ J Surg* 2003;73(9):712-6.  
9  
10  
11  
12  
13  
14  
15  
16  
17  
18  
19  
20  
21  
22  
23  
24  
25  
26  
27  
28  
29  
30  
31  
32  
33  
34  
35  
36  
37  
38  
39  
40  
41  
42  
43  
44  
45  
46  
47  
48  
49  
50  
51  
52  
53  
54  
55  
56  
57  
58  
59  
60



**Appendix 1 - PRISMA-P (Preferred Reporting Items for Systematic review and Meta-Analysis Protocols) 2015 checklist: recommended items to address in a systematic review protocol\***

| Section and topic                 | Item No | Checklist item                                                                                                                                                                                                                | Page number                |
|-----------------------------------|---------|-------------------------------------------------------------------------------------------------------------------------------------------------------------------------------------------------------------------------------|----------------------------|
| <b>ADMINISTRATIVE INFORMATION</b> |         |                                                                                                                                                                                                                               |                            |
| Title:                            |         |                                                                                                                                                                                                                               |                            |
| Identification                    | 1a      | Identify the report as a protocol of a systematic review                                                                                                                                                                      | 1                          |
| Update                            | 1b      | If the protocol is for an update of a previous systematic review, identify as such                                                                                                                                            | Not an update              |
| Registration                      | 2       | If registered, provide the name of the registry (such as PROSPERO) and registration number                                                                                                                                    | PROSPERO<br>CRD42017069261 |
| Authors:                          |         |                                                                                                                                                                                                                               |                            |
| Contact                           | 3a      | Provide name, institutional affiliation, e-mail address of all protocol authors; provide physical mailing address of corresponding author                                                                                     | 1                          |
| Contributions                     | 3b      | Describe contributions of protocol authors and identify the guarantor of the review                                                                                                                                           | 10                         |
| Amendments                        | 4       | If the protocol represents an amendment of a previously completed or published protocol, identify as such and list changes; otherwise, state plan for documenting important protocol amendments                               | Not applicable             |
| Support:                          |         |                                                                                                                                                                                                                               |                            |
| Sources                           | 5a      | Indicate sources of financial or other support for the review                                                                                                                                                                 | 11                         |
| Sponsor                           | 5b      | Provide name for the review funder and/or sponsor                                                                                                                                                                             | 11                         |
| Role of sponsor or funder         | 5c      | Describe roles of funder(s), sponsor(s), and/or institution(s), if any, in developing the protocol                                                                                                                            | 11                         |
| <b>INTRODUCTION</b>               |         |                                                                                                                                                                                                                               |                            |
| Rationale                         | 6       | Describe the rationale for the review in the context of what is already known                                                                                                                                                 | 3,4                        |
| Objectives                        | 7       | Provide an explicit statement of the question(s) the review will address with reference to participants, interventions, comparators, and outcomes (PICO)                                                                      | 4                          |
| <b>METHODS</b>                    |         |                                                                                                                                                                                                                               |                            |
| Eligibility criteria              | 8       | Specify the study characteristics (such as PICO, study design, setting, time frame) and report characteristics (such as years considered, language, publication status) to be used as criteria for eligibility for the review | 4, 5, 6, 7                 |
| Information sources               | 9       | Describe all intended information sources (such as electronic databases, contact with study authors, trial registers or other grey literature sources) with planned dates of coverage                                         | 6                          |
| Search strategy                   | 10      | Present draft of search strategy to be used for at least one electronic database, including planned limits, such that it could be repeated                                                                                    | Detailed on<br>Appendix 2  |
| Study records:                    |         |                                                                                                                                                                                                                               |                            |
| Data management                   | 11a     | Describe the mechanism(s) that will be used to manage records and data throughout the review                                                                                                                                  | 7                          |

|                                    |     |                                                                                                                                                                                                                                                  |                  |
|------------------------------------|-----|--------------------------------------------------------------------------------------------------------------------------------------------------------------------------------------------------------------------------------------------------|------------------|
| Selection process                  | 11b | State the process that will be used for selecting studies (such as two independent reviewers) through each phase of the review (that is, screening, eligibility and inclusion in meta-analysis)                                                  | 7                |
| Data collection process            | 11c | Describe planned method of extracting data from reports (such as piloting forms, done independently, in duplicate), any processes for obtaining and confirming data from investigators                                                           | 8                |
| Data items                         | 12  | List and define all variables for which data will be sought (such as PICO items, funding sources), any pre-planned data assumptions and simplifications                                                                                          | 8 and Appendix 4 |
| Outcomes and prioritization        | 13  | List and define all outcomes for which data will be sought, including prioritization of main and additional outcomes, with rationale                                                                                                             | 5, 6             |
| Risk of bias in individual studies | 14  | Describe anticipated methods for assessing risk of bias of individual studies, including whether this will be done at the outcome or study level, or both; state how this information will be used in data synthesis                             | 7, 8             |
| Data synthesis                     | 15a | Describe criteria under which study data will be quantitatively synthesised                                                                                                                                                                      | 8,9              |
|                                    | 15b | If data are appropriate for quantitative synthesis, describe planned summary measures, methods of handling data and methods of combining data from studies, including any planned exploration of consistency (such as $I^2$ , Kendall's $\tau$ ) | 8, 9             |
|                                    | 15c | Describe any proposed additional analyses (such as sensitivity or subgroup analyses, meta-regression)                                                                                                                                            | Not applicable   |
|                                    | 15d | If quantitative synthesis is not appropriate, describe the type of summary planned                                                                                                                                                               | 8, 9             |
| Meta-bias(es)                      | 16  | Specify any planned assessment of meta-bias(es) (such as publication bias across studies, selective reporting within studies)                                                                                                                    | Not applicable   |
| Confidence in cumulative evidence  | 17  | Describe how the strength of the body of evidence will be assessed (such as GRADE)                                                                                                                                                               | 8                |

**\* It is strongly recommended that this checklist be read in conjunction with the PRISMA-P Explanation and Elaboration (cite when available) for important clarification on the items. Amendments to a review protocol should be tracked and dated. The copyright for PRISMA-P (including checklist) is held by the PRISMA-P Group and is distributed under a Creative Commons Attribution Licence 4.0.**

***From: Shamseer L, Moher D, Clarke M, Ghersi D, Liberati A, Petticrew M, Shekelle P, Stewart L, PRISMA-P Group. Preferred reporting items for systematic review and meta-analysis protocols (PRISMA-P) 2015: elaboration and explanation. BMJ. 2015 Jan 2;349(jan02 1):g7647.***

## Appendix 2 - General Search Strategy

1. ('primary health care\*' or 'primary care\*' or 'primary health\*' or 'primary health care interven\*' or 'health\* manag\*' or 'care manag\*' or 'primary health interven\*' or 'prevent\* program\*' or 'prevent\* interven\*' or 'early interven\*' or 'primary health\*' or 'strateg\*' or 'health promot\*' or 'comprehensive health\*' or 'community health\*' or 'famil\* health\*' or 'public health\*' or 'health\* system\*' or 'health\* worker\*' or 'health\* profession\*' or 'health\* polic\*' or 'antenatal car\*' or 'antenatal clinic\*' or 'basic health\*').mp. [mp=title, abstract, original title, name of substance word, subject heading word, keyword heading word, protocol supplementary concept word, rare disease supplementary concept word, unique identifier, synonyms]

2. Primary Health Care/ or Public Health/ or Health Policy/ or Health Promotion/ or Health Personnel/ or Developing Countries/

3. 1 {or/and} 2

4. ('partner violen\*' or 'partner abus\*' or 'spouse violen\*' or 'spouse abus\*' or 'partner harm\*' or 'violen\* against wom\*' or 'battered women' or 'dating violen\*' or 'dating abus\*' or 'gender based violen\*' or 'gender based abus\*').mp. [mp=title, abstract, original title, name of substance word, subject heading word, keyword heading word, protocol supplementary concept word, rare disease supplementary concept word, unique identifier, synonyms]

5. Intimate Partner Violence/ or Battered Women/

6. 4 {or/and} 5

7. ('low\* middle\* incom\* countr\*' OR 'low\* incom\* countr\*' OR 'middle\* incom\* countr\*' OR 'underdevelop\* countr\*' OR 'developing countr\*' OR 'third\* world countr\*' OR 'low\* middle\* income\* nation\*' OR 'third\*world\* nation\*' OR 'underdevelop\* nation\*' OR 'less\* developed nation\*' OR 'low\* income nation\*' OR 'developing nation\*' OR 'least\* developed countr\*' OR 'emerg\* countr\*' OR 'less-developed countr\*' OR 'developing world\*' OR 'undeveloped world\*' OR 'emerg\* world' OR 'Latin\* America\*' OR 'Central\* America\*' OR 'Caribbean' OR 'South\* America\*' OR 'Africa\*' OR 'Asia\*' OR 'Pacific' OR 'Middle\* East\*' OR 'Latin\* America\*' OR 'Central America\*' OR 'South America\*' OR 'Africa\*' OR 'Asia\*' OR 'Pacific\*' OR 'Middle East\*' OR 'Afghanistan' OR 'Albania' OR 'Algeria' OR 'American Samoa' OR 'Angola' OR 'Argentina' OR 'Armenia' OR 'Azerbaijan' OR 'Bangladesh' OR 'Belarus' OR 'Belize' OR 'Benin' OR 'Bhutan' OR 'Bolivia' OR 'Bosnia\*Herzegovina' OR 'Botswana' OR 'Brazil' OR 'Bulgaria' OR 'Burkina Faso' OR 'Burundi' OR 'Cabo Verde' OR 'Cambodia' OR 'Cameroon' OR 'Central African Republic' OR 'Chad' OR 'China' OR 'Colombia' OR 'Comoros' OR 'Congo, Dem\* Rep\*' OR 'Congo, Rep\*' OR 'Costa Rica' OR 'Cote d'Ivoire' OR 'Cuba' OR 'Djibouti' OR 'Dominica' OR 'Dominican Republic' OR 'Ecuador' OR 'Egypt' OR 'El Salvador' OR 'Equatorial Guinea' OR 'Eritrea' OR 'Ethiopia' OR 'Fiji' OR 'Gabon' OR 'Gambia' OR 'Georgia' OR 'Ghana' OR 'Grenada' OR 'Guatemala' OR 'Guinea' OR 'Guinea-Bissau' OR 'Guyana' OR 'Haiti' OR 'Honduras' OR 'India' OR 'Indonesia' OR 'Iran' OR 'Iraq' OR 'Jamaica' OR 'Jordan' OR 'Kazakhstan' OR 'Kenya' OR 'Kiribati' OR 'Korea, Dem\* People's Rep\*' OR 'North Korea' OR 'Kosovo' OR 'Kyrgyz' OR 'Lao' OR 'Lebanon' OR 'Lesotho' OR 'Liberia' OR 'Libya' OR 'Macedonia' OR 'Madagascar' OR 'Malawi' OR 'Malaysia' OR 'Maldives' OR 'Mali' OR 'Marshall Islands' OR 'Mauritania' OR 'Mauritius' OR Mexico' OR 'Micronesia' OR 'Moldova' OR 'Mongolia' OR 'Montenegro' OR 'Morocco' OR 'Mozambique' OR 'Myanmar' OR 'Namibia' OR 'Nepal' OR 'Nicaragua' OR 'Niger' OR 'Nigeria' OR 'Pakistan' OR 'Palau' OR 'Palestine' OR 'Panama' OR 'Papua New Guinea' OR 'Paraguay' OR 'Peru' OR 'Philippines' OR 'Romania' OR 'Russian Federation' OR 'Russia' OR 'Rwanda' OR 'Samoa' OR 'Sao Tome and Principe' OR 'Senegal' OR 'Serbia' OR 'Sierra Leone' OR 'Solomon Islands' OR 'Somalia' OR 'South Africa' OR 'South Sudan' OR 'Sri Lanka' OR 'St. Lucia' OR 'St. Vincent and the Grenadines' OR 'Sudan' OR 'Suriname' OR 'Swaziland' OR 'Syrian Arab Republic' OR 'Syria' OR 'Tajikistan' OR 'Tanzania' OR 'Thailand' OR 'Timor-Leste' OR 'East Timor' OR 'Togo' OR 'Tonga' OR 'Tunisia' OR 'Turkey' OR 'Turkmenistan' OR 'Tuvalu' OR 'Uganda' OR 'Ukraine' OR 'Uzbekistan' OR 'Vanuatu' OR 'Venezuela' OR 'Vietnam' OR 'West Bank\* Gaza' OR 'Yemen' OR 'Zambia' OR 'Zimbabwe').mp. [mp=title, abstract, original title, name

of substance word, subject heading word, keyword heading word, protocol supplementary concept word, rare disease supplementary concept word, unique identifier, synonyms]

8. Developing countries/ OR Argentina/ OR Bolivia/ OR Brazil/ OR Colombia/ OR Ecuador/ OR Guyana/ OR Paraguay/ OR Peru/ OR Suriname/ OR Venezuela/ OR exp Latin America/ OR exp Caribbean Region/ OR exp Central America/ OR exp Africa/ OR esp Central Asia/ OR exp Northern Asia/ OR Cambodia/ OR Timor-Leste/ OR Indonesia/ OR Laos/ OR Malaysia/ OR Myanmar/ OR Philippines/ OR Thailand/ OR Vietnam/ OR Bangladesh/ OR Buthan/ OR exp India/ OR Nepal/ OR Pakistan/ OR Sri Lanka/ OR Afghanistan/ OR Iran/ OR Iraq/ OR Jordan/ OR Lebanon/ OR Syria/ OR Turkey/ OR Yemen/ OR exp China/ OR Mongolia/ OR Democratic People's Republic of Korea/ OR Balkan Peninsula/ OR Albania/ OR Bosnia and Herzegovina/ OR Bulgaria/ OR Kosovo/ OR Macedonia/ OR Moldova/ OR Montenegro/ OR exp Republic of Belarus OR Romania/ OR exp Russia/ OR Serbia/ OR Ukraine/ OR exp Transcaucasia/ OR Comoros/ OR Madagascar/ OR Mauritius/ OR Indonesia/ OR Fiji/ OR Papua New Guinea/ OR Vanuatu/ OR Palau/ OR exp Samoa/ OR Tonga/ OR Cuba/ OR Dominica/ OR Dominican Republic/ OR Grenada/ OR Haiti/ OR Jamaica/ OR St. Lucia/ OR St. Vincent and the Grenadines/

9. 7 {or/and} 8

10. 3 and 6 and 9

11. Limit 10 to (full text and yr="2007 -Current" and (English or Portuguese or Spanish))

| Search | Free text words - Portuguese (MeSH terms only available in English)                                                                                                                                                                                                                                                                                                                                                                                                                                                                                                                                                                                                                                                                                                                                                                                                                                                                                                                                                                                                                                                                                                                    |
|--------|----------------------------------------------------------------------------------------------------------------------------------------------------------------------------------------------------------------------------------------------------------------------------------------------------------------------------------------------------------------------------------------------------------------------------------------------------------------------------------------------------------------------------------------------------------------------------------------------------------------------------------------------------------------------------------------------------------------------------------------------------------------------------------------------------------------------------------------------------------------------------------------------------------------------------------------------------------------------------------------------------------------------------------------------------------------------------------------------------------------------------------------------------------------------------------------|
| #1     | <p>“atenção primár* saúde” OR “cuidado* primár*” OR “saúde primár*” OR “gestão* saúde” OR “manej* saúde” OR “interven* saúde* primár*” OR “program* preven*” OR “interven* preven*” OR “interven* precoce*” OR “estratégi* saúde primár*” OR “promoç* d* saúde” OR “saúde integral*” OR “saúde* comuni*” OR “saúde* família*” OR “saúde públic*” OR “sistema* saúde*” OR “trabalhador* saúde” OR “agente* saúde” OR “profissão* saúde” OR “polític* saúde” OR “cuidado* pré-nata*” OR “ambulatór* pré-nata*” OR “saúde básic*” OR “atenç* básic*” OR “centro* saúde” OR “posto* saúde” OR “unidade* saúde”</p>                                                                                                                                                                                                                                                                                                                                                                                                                                                                                                                                                                         |
| #2     | <p>“violen* parceir*” OR “abus* parceir*” OR “violen* conjug*” OR “abus* conjug*” OR “agress* parceir*” OR “violen* contra* mulher*” OR “mulher* espancada*” OR “violen* namor*” OR “abus* namor*” OR “violen* gênero” OR “abus* gênero”</p>                                                                                                                                                                                                                                                                                                                                                                                                                                                                                                                                                                                                                                                                                                                                                                                                                                                                                                                                           |
| #3     | <p>“país* renda baixa* média*” OR “país* baixa* média* renda*” OR “país* baixa* renda*” OR “país* renda* média” OR “país* subdesenvolv*” OR “país* em desenvolvimento” OR “país* terceiro mundo” OR “naç* renda baixa* média*” OR “naç* terceiro mundo” OR “naç* subdesenvolv*” OR “naç* menos desenvolvid*” OR “naç* baix* desenvolv*” OR “naç* em desenvolvimento” OR “país* menos desenvolvid*” OR “país* emergente*” OR “país* pobre*” OR “naç* pobre*” OR “mundo em desenvolvimento” OR “mundo subdesenvolvido” OR “mundo emergente” OR “naç* emergente* OR “América Latin*” OR "América Central" OR "América do Sul" OR “Carib*” OR "África*" OR "Ásia*" OR "Pacífico*" OR “Oceania” OR "Oriente Médio" OR "Afeganistão" OR "Albânia" OR "Argélia" OR "Samoa Americana" OR "Angola" OR "Argentina" OR "Armênia" OR "Azerbaijão" OR "Bangladesh" OR "Bielorrússia" OR "Belize" OR "Benin" OR "Butão" OR "Bolívia" OR "Bósnia* Herzegovina" OR "Botswana" OR "Brasil" OR "Bulgária" OR “Burkina Faso" OR "Burundi" OR "Cabo Verde" OR "Camboja" OR "Camarões" OR "República Centro-Africana" OR "Chade" OR "China" OR "Colômbia" OR "Comores" OR "Congo, Dem* Rep*" OR "Congo,</p> |

|                                                                                                                                                                                                                                                                                                                                                                                                                                                                                                                                                                                                                                                                                                                                                                                                                                                                                                                                                                                                                                                                                                                                                                                                                                                                                                                                                                                                                                                                                                                                                                                                                                                                                                                                              |
|----------------------------------------------------------------------------------------------------------------------------------------------------------------------------------------------------------------------------------------------------------------------------------------------------------------------------------------------------------------------------------------------------------------------------------------------------------------------------------------------------------------------------------------------------------------------------------------------------------------------------------------------------------------------------------------------------------------------------------------------------------------------------------------------------------------------------------------------------------------------------------------------------------------------------------------------------------------------------------------------------------------------------------------------------------------------------------------------------------------------------------------------------------------------------------------------------------------------------------------------------------------------------------------------------------------------------------------------------------------------------------------------------------------------------------------------------------------------------------------------------------------------------------------------------------------------------------------------------------------------------------------------------------------------------------------------------------------------------------------------|
| <p>Rep*" OR "Costa Rica" OR "Costa do Marfim" OR "Cuba" OR "Djibouti" OR "Dominica" OR "República Dominicana" OR "Ecuador" OR "Egito" OR "El Salvador" OR "Guiné Equatorial" OR "Eritreia" OR "Etiópia" OR "Fiji" OR "Gabão" OR "Gâmbia" OR "Geórgia" OR "Gana" OR "Granada" OR "Guatemala" OR "Guiné" OR "Guiné-Bissau" OR "Guiana" OR "Haiti" OR "Honduras" OR "Índia" OR "Indonésia" OR "Irã" OR "Iraque" OR "Jamaica" OR "Jordânia" OR "Cazaquistão" OR "Quênia" OR "Kiribati" OR "Coréia, Rep* Dem*" OR "Coréia do Norte" OR "Kosovo" OR "Quirguistão" OR "Laos" OR "Líbano" OR "Lesoto" OR "Libéria" OR "Líbia" OR "Macedônia" OR "Madagascar" OR "Malawi" OR "Malásia" OR "Maldivas" OR "Mali" OR "Ilhas Marshall" OR "Mauritânia" OR "Mauríci*" OR "México" OR "Micronésia" OR "Moldávia" OR "Mongólia" OR "Montenegro" OR "Marrocos" OR "Moçambique" OR "Mianmar" OR "Namíbia" OR "Nepal" OR "Nicarágua" OR "Níger" OR "Nigéria" OR "Paquistão" OR "Palau" OR "Panamá" OR "Papua Nova Guiné" OR "Paraguai" OR "Peru" OR "Filipinas" OR "Romênia" OR "Federação Russa" OR "Rússia" OR "Ruanda" OR "Samoa" OR "São Tomé e Príncipe" OR "Senegal" OR "Sérvia" OR "Serra Leoa" OR "Ilhas Salomão" OR "Somália" OR "África do Sul" OR "Sudão do Sul" OR "Sri Lanka" OR "St. Lucia" OR "São. Vicente e Granadinas" OR "Sudão" OR "Suriname" OR "Suazilândia" OR "República Árabe da Síria" OR "Síria" OR "Tajiquistão" OR "Tanzânia" OR "Tailândia" OR "Timor-Leste" OR "Timor* Leste" OR "Togo" OR "Tonga" OR "Tunísia" OR "Turquia" OR "Turcomenistão" OR "Tuvalu" OR "Uganda" OR "Ucrânia" OR "Uzbequistão" OR "Vanuatu" OR "Venezuela" OR "Vietn*" OR "Cisjordânia" OR "Gaza" OR "Palestina" OR "Iêmen" OR "Zâmbia" OR "Zimbábue"</p> |
|----------------------------------------------------------------------------------------------------------------------------------------------------------------------------------------------------------------------------------------------------------------------------------------------------------------------------------------------------------------------------------------------------------------------------------------------------------------------------------------------------------------------------------------------------------------------------------------------------------------------------------------------------------------------------------------------------------------------------------------------------------------------------------------------------------------------------------------------------------------------------------------------------------------------------------------------------------------------------------------------------------------------------------------------------------------------------------------------------------------------------------------------------------------------------------------------------------------------------------------------------------------------------------------------------------------------------------------------------------------------------------------------------------------------------------------------------------------------------------------------------------------------------------------------------------------------------------------------------------------------------------------------------------------------------------------------------------------------------------------------|

| Search | Free text words - Spanish (MeSH terms only available in English)                                                                                                                                                                                                                                                                                                                                                                                                                                                                                                                                                                                                                                                                                                                                                                                                                                 |
|--------|--------------------------------------------------------------------------------------------------------------------------------------------------------------------------------------------------------------------------------------------------------------------------------------------------------------------------------------------------------------------------------------------------------------------------------------------------------------------------------------------------------------------------------------------------------------------------------------------------------------------------------------------------------------------------------------------------------------------------------------------------------------------------------------------------------------------------------------------------------------------------------------------------|
| #1     | <p>“atenci* primar* salud” OR “atenci* primar*” OR “cuidado* primar*” OR “salud primar*” OR “gestión* salud” OR “manej* salud” OR “interven* primar* salud*” OR “program* OR interven*” OR “interven* tempran*” OR “estrateg* salud primar*” OR “promoc* salud” OR “salud integral*” OR “salud* comuni*” OR “salud* famili*” OR “salud public*” OR “sistema* salud” OR “trabajad* salud” OR “agente* salud” OR “profession* salud” OR “politic* salud” OR “cuidado prenatal*” OR “clínica* prenatal*” OR “salud basic*” OR “atenci* basic*” OR “primer nivel de atención” OR “centro* de salud” OR “puesto* de salud” OR “posta* médica*”</p>                                                                                                                                                                                                                                                    |
| #2     | <p>“violencia* pareja*” OR “abuso* pareja*” OR “violencia conyug*” OR “abuso conyug*” OR “daño* pareja*” OR “violencia* contra la* mujer*” OR “abus* contra la* mujer*” OR “mujer* golpeada*” OR “mujer* maltratada*” OR “violencia* contra la* enamora*” OR “abus* contra la* enamora*” OR “violencia de género” OR “abuso de género” OR “violencia de* compañer* íntim*” OR “mujer* violentada*”</p>                                                                                                                                                                                                                                                                                                                                                                                                                                                                                           |
| #3     | <p>“país* con ingreso mediano* bajo*” OR “país* con ingreso bajo*” OR “país* subdesarrollado*” OR “país* en desarrollo*” OR “país* tercer mundo” OR “nación* con ingreso mediano* bajo*” OR “nación* del tercer mundo” OR “nación* subdesarrollada*” OR “nación* menos desarroll*” OR “nación* con bajo desarroll*” OR “nación* en desarrollo” OR “país* menos desarroll*” OR “país* menos desarroll*” OR “país* emergente*” OR “nación* emergente*” OR “mundo emergente” OR “mundo subdesarrollado” OR “país* en vías de desarrollo” OR “Caribe” OR “América Latina*” OR “América del Sur” OR “Sudamérica” OR “África*” OR “Asia*” OR “Pacífico” OR “Oriente Medio” OR “Afganistán” OR “Albania” OR “Argelia” OR “Angola” OR “Argentina” OR “Samoa Americana” OR “Armenia” OR “Azerbaiyán” OR “Bangladesh” OR “Bielorrusia” OR “Belice” OR “Benin” OR “Bolivia” OR “Bosnia* Herzegovina” OR</p> |

"Botswana" OR "Brasil" OR "Bulgaria" OR "Burkina Faso" OR "Burundi" OR "Bhutan"  
 OR "Cabo Verde" OR "Camboya" OR "Camerún" OR "República Centroafricana"  
 OR "Chad" OR "China" OR "Costa Rica" OR "Costa de Marfil" OR "Cuba" OR  
 "Djibouti" OR "Dominica" OR "Costa Rica" OR "Colombia" OR "Comoras" OR "Congo,  
 Rep\*" OR "República Dominicana" OR "Ecuador" OR "Egipto" OR "El Salvador" OR  
 "Guinea Ecuatorial" OR "Eritrea" OR "Etiopía" OR "Fiji" OR "Gabón" OR "Georgia"  
 OR "Gambia" OR "Ghana" OR "Grenada" OR "Guatemala" OR "Guinea" OR "Guinea-  
 Bissau" OR "Guyana" OR "Haití" OR "Honduras" OR "India" OR "Indonesia" OR "Iran"  
 OR "Irak" OR "Jamaica" OR "Jordania" OR "Kazajstán" OR "Kenia" OR "Kiribati" OR  
 "Corea, República Democrática" OR "Corea del Norte" OR "Kosovo" OR "Laos" OR  
 "Líbano" OR "Lesotho" OR "Liberia" OR "Libia" OR "Macedonia" OR "Madagascar"  
 OR "Malawi" OR "Malasia" OR "Maldivas" OR "Mali" OR "Islas Marshall" OR  
 "Mauritania" OR "Maurici\*" OR "México" OR "Micronesia" OR "Moldavia" OR  
 "Mongolia" OR "Montenegro" OR "Marruecos" OR "Mozambique" OR "Myanmar" OR  
 "Namibia" OR "Nepal" OR "Nicaragua" OR "Níger" OR "Nigeria" OR "Pakistán" OR  
 "Palau" OR "Panamá" OR "Papúa Nueva Guinea" OR "Paraguay" OR "Perú" OR  
 "Filipinas" OR "Rumania" OR "Rusia" OR "Rwanda" OR "Samoa" OR "Santo Tomé y  
 Príncipe" OR "Senegal" OR "Serbia" OR "Sierra Leona" OR "Somalia" OR "Sudáfrica"  
 OR "Sudán del Sur" OR "Sri Lanka" OR "St. Lucia" OR "Siria" OR "Tayikistán" OR  
 "Tanzania" OR "Tailandia" OR "Timor Oriental" OR "República Democrática del  
 Congo" OR "Tonga" OR "Túnez" OR "Turquía" OR "Turkmenistán" OR "Tuvalu" OR  
 "Uganda" OR "Ucrania" OR "Uzbekistán" OR "Vanuatu" OR "Venezuela" OR  
 "Vietnam" OR "Cisjordania\*" OR "Gaza" OR "Palestina" OR "Yemen" OR "Zambia"  
 OR "Zimbabwe"

This search strategy can be adapted and modified according to each electronic database.



**Appendix 3 -PRISMA Flow Diagram: flow of information through different phases of a systematic review**

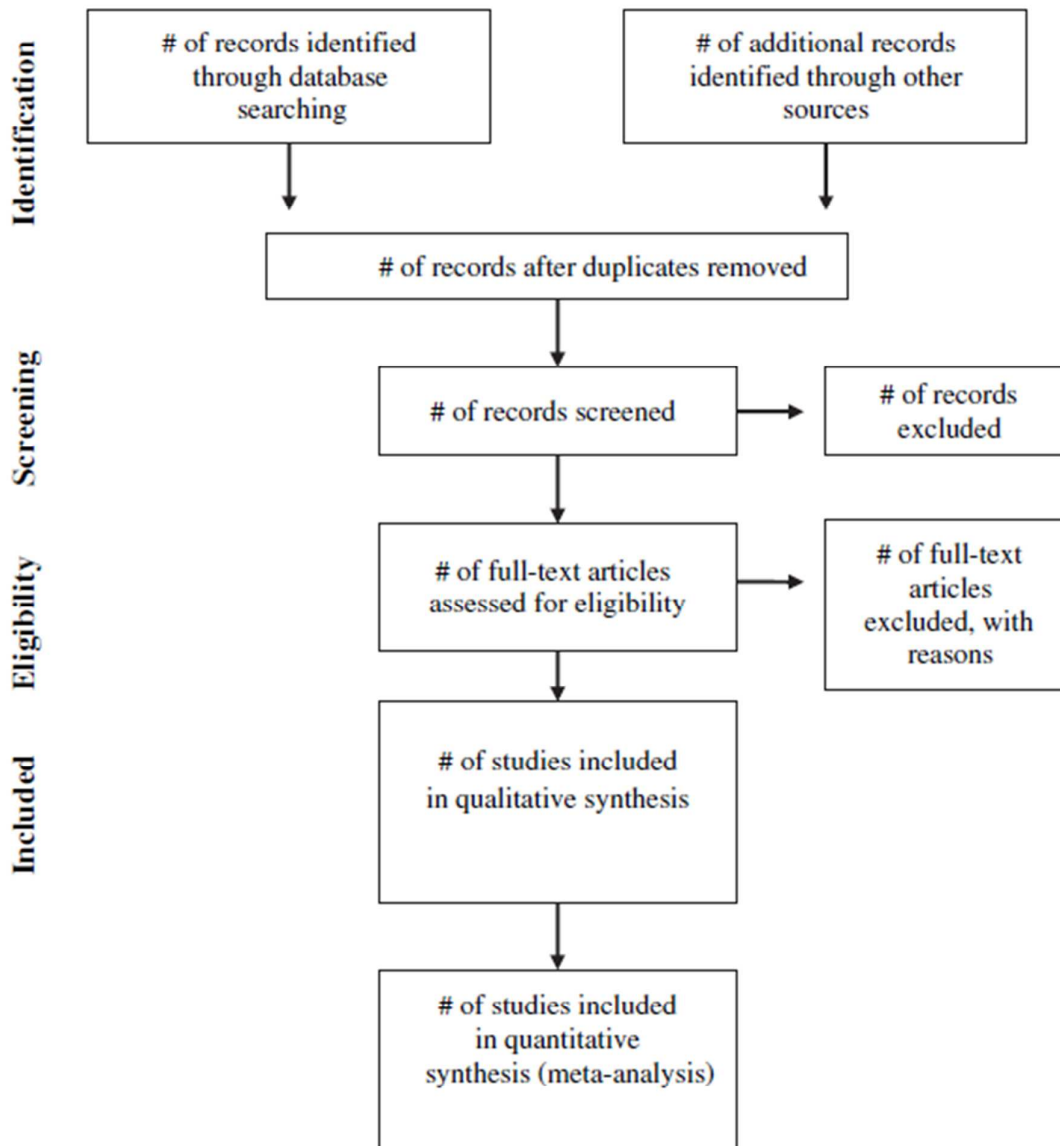

45 Source: Moher D, Liberati A, Tetzlaff J, et al. Preferred reporting items for systematic reviews and meta-  
 46 analyses: the PRISMA statement. PLoS Med 2009;6:e1000097 doi:10.1371/journal.pmed.1000097 [published  
 47 Online: 21 July 2009].

## Appendix 4 - Data Items

### 1. General Information and characteristics of the studies

- a. Author's name
- b. Journal
- c. Year of publication
- d. Country of the intervention
- e. Context (urban/rural)
- f. Type of service/setting
- g. Participants (e.g. workers, users - victims, family members, perpetrators)

### 2. Methodology

- a. Study design
- b. Type of intervention
- c. Sample/number of participants
- d. Year(s) when intervention was conducted
- e. Data collection
- f. Measures
- g. Analysis
- h. Ethics clearance

### 3. Impacts/outcomes of the intervention for survivors:

- a. IPV rates
- b. health (e.g. physical, mental)
- c. safety (e.g. safety plans)
- d. wellbeing (e.g. quality of life)
- e. children (e.g. children's health and wellbeing)
- f. Other Impacts/outcomes (if described)
- g. Barriers and facilitators for survivors (if investigated)

### 4. Impacts/outcomes of the intervention for PHC workers:

- a. Types of workers (e.g. nurses, community health workers, receptionists)
- b. Worker's' role in the intervention
- c. Measures of impacts/outcomes concerned to workers
- d. Barriers and facilitators for workers (if described)

### 5. Role of the PHC services and public health systems to improve survivors' healthcare:

- a. Measures of impacts/outcomes of the intervention for services/systems
- b. Impacts/outcomes of the intervention for policies and organizational structure
- c. Articulation with other levels of care in the healthcare system (e.g. hospital, emergency, etc.)
- d. Articulation with other sectors beyond public health (e.g. police, justice, housing, etc.)
- e. Costs
- f. Sustainability
- g. Barriers and facilitators for services/systems (if described)

### 6. Other relevant information



**Appendix 1 - PRISMA-P (Preferred Reporting Items for Systematic review and Meta-Analysis Protocols) 2015 checklist: recommended items to address in a systematic review protocol\***

| Section and topic                 | Item No | Checklist item                                                                                                                                                                                                                | Page number                |
|-----------------------------------|---------|-------------------------------------------------------------------------------------------------------------------------------------------------------------------------------------------------------------------------------|----------------------------|
| <b>ADMINISTRATIVE INFORMATION</b> |         |                                                                                                                                                                                                                               |                            |
| Title:                            |         |                                                                                                                                                                                                                               |                            |
| Identification                    | 1a      | Identify the report as a protocol of a systematic review                                                                                                                                                                      | 1                          |
| Update                            | 1b      | If the protocol is for an update of a previous systematic review, identify as such                                                                                                                                            | Not an update              |
| Registration                      | 2       | If registered, provide the name of the registry (such as PROSPERO) and registration number                                                                                                                                    | PROSPERO<br>CRD42017069261 |
| Authors:                          |         |                                                                                                                                                                                                                               |                            |
| Contact                           | 3a      | Provide name, institutional affiliation, e-mail address of all protocol authors; provide physical mailing address of corresponding author                                                                                     | 1                          |
| Contributions                     | 3b      | Describe contributions of protocol authors and identify the guarantor of the review                                                                                                                                           | 10                         |
| Amendments                        | 4       | If the protocol represents an amendment of a previously completed or published protocol, identify as such and list changes; otherwise, state plan for documenting important protocol amendments                               | Not applicable             |
| Support:                          |         |                                                                                                                                                                                                                               |                            |
| Sources                           | 5a      | Indicate sources of financial or other support for the review                                                                                                                                                                 | 11                         |
| Sponsor                           | 5b      | Provide name for the review funder and/or sponsor                                                                                                                                                                             | 11                         |
| Role of sponsor or funder         | 5c      | Describe roles of funder(s), sponsor(s), and/or institution(s), if any, in developing the protocol                                                                                                                            | 11                         |
| <b>INTRODUCTION</b>               |         |                                                                                                                                                                                                                               |                            |
| Rationale                         | 6       | Describe the rationale for the review in the context of what is already known                                                                                                                                                 | 3,4                        |
| Objectives                        | 7       | Provide an explicit statement of the question(s) the review will address with reference to participants, interventions, comparators, and outcomes (PICO)                                                                      | 4                          |
| <b>METHODS</b>                    |         |                                                                                                                                                                                                                               |                            |
| Eligibility criteria              | 8       | Specify the study characteristics (such as PICO, study design, setting, time frame) and report characteristics (such as years considered, language, publication status) to be used as criteria for eligibility for the review | 4, 5, 6, 7                 |
| Information sources               | 9       | Describe all intended information sources (such as electronic databases, contact with study authors, trial registers or other grey literature sources) with planned dates of coverage                                         | 6                          |
| Search strategy                   | 10      | Present draft of search strategy to be used for at least one electronic database, including planned limits, such that it could be repeated                                                                                    | Detailed on<br>Appendix 2  |
| Study records:                    |         |                                                                                                                                                                                                                               |                            |
| Data management                   | 11a     | Describe the mechanism(s) that will be used to manage records and data throughout the review                                                                                                                                  | 7                          |

|                                    |     |                                                                                                                                                                                                                                                  |                  |
|------------------------------------|-----|--------------------------------------------------------------------------------------------------------------------------------------------------------------------------------------------------------------------------------------------------|------------------|
| Selection process                  | 11b | State the process that will be used for selecting studies (such as two independent reviewers) through each phase of the review (that is, screening, eligibility and inclusion in meta-analysis)                                                  | 7                |
| Data collection process            | 11c | Describe planned method of extracting data from reports (such as piloting forms, done independently, in duplicate), any processes for obtaining and confirming data from investigators                                                           | 8                |
| Data items                         | 12  | List and define all variables for which data will be sought (such as PICO items, funding sources), any pre-planned data assumptions and simplifications                                                                                          | 8 and Appendix 4 |
| Outcomes and prioritization        | 13  | List and define all outcomes for which data will be sought, including prioritization of main and additional outcomes, with rationale                                                                                                             | 5, 6             |
| Risk of bias in individual studies | 14  | Describe anticipated methods for assessing risk of bias of individual studies, including whether this will be done at the outcome or study level, or both; state how this information will be used in data synthesis                             | 7, 8             |
| Data synthesis                     | 15a | Describe criteria under which study data will be quantitatively synthesised                                                                                                                                                                      | 8,9              |
|                                    | 15b | If data are appropriate for quantitative synthesis, describe planned summary measures, methods of handling data and methods of combining data from studies, including any planned exploration of consistency (such as $I^2$ , Kendall's $\tau$ ) | 8, 9             |
|                                    | 15c | Describe any proposed additional analyses (such as sensitivity or subgroup analyses, meta-regression)                                                                                                                                            | Not applicable   |
|                                    | 15d | If quantitative synthesis is not appropriate, describe the type of summary planned                                                                                                                                                               | 8, 9             |
| Meta-bias(es)                      | 16  | Specify any planned assessment of meta-bias(es) (such as publication bias across studies, selective reporting within studies)                                                                                                                    | Not applicable   |
| Confidence in cumulative evidence  | 17  | Describe how the strength of the body of evidence will be assessed (such as GRADE)                                                                                                                                                               | 8                |

**\* It is strongly recommended that this checklist be read in conjunction with the PRISMA-P Explanation and Elaboration (cite when available) for important clarification on the items. Amendments to a review protocol should be tracked and dated. The copyright for PRISMA-P (including checklist) is held by the PRISMA-P Group and is distributed under a Creative Commons Attribution Licence 4.0.**

*From: Shamseer L, Moher D, Clarke M, Ghersi D, Liberati A, Petticrew M, Shekelle P, Stewart L, PRISMA-P Group. Preferred reporting items for systematic review and meta-analysis protocols (PRISMA-P) 2015: elaboration and explanation. BMJ. 2015 Jan 2;349(jan02 1):g7647.*

## Appendix 2 - General Search Strategy

1. ('primary health care\*' or 'primary care\*' or 'primary health\*' or 'primary health care interven\*' or 'health\* manag\*' or 'care manag\*' or 'primary health interven\*' or 'prevent\* program\*' or 'prevent\* interven\*' or 'early interven\*' or 'primary health\*' or 'strateg\*' or 'health promot\*' or 'comprehensive health\*' or 'community health\*' or 'famil\* health\*' or 'public health\*' or 'health\* system\*' or 'health\* worker\*' or 'health\* profession\*' or 'health\* polic\*' or 'antenatal car\*' or 'antenatal clinic\*' or 'basic health\*').mp. [mp=title, abstract, original title, name of substance word, subject heading word, keyword heading word, protocol supplementary concept word, rare disease supplementary concept word, unique identifier, synonyms]

2. Primary Health Care/ or Public Health/ or Health Policy/ or Health Promotion/ or Health Personnel/ or Developing Countries/

3. 1 {or/and} 2

4. ('partner violen\*' or 'partner abus\*' or 'spouse violen\*' or 'spouse abus\*' or 'partner harm\*' or 'violen\* against wom\*' or 'battered women' or 'dating violen\*' or 'dating abus\*' or 'gender based violen\*' or 'gender based abus\*').mp. [mp=title, abstract, original title, name of substance word, subject heading word, keyword heading word, protocol supplementary concept word, rare disease supplementary concept word, unique identifier, synonyms]

5. Intimate Partner Violence/ or Battered Women/

6. 4 {or/and} 5

7. ('low\* middle\* incom\* countr\*' OR 'low\* incom\* countr\*' OR 'middle\* incom\* countr\*' OR 'underdevelop\* countr\*' OR 'developing countr\*' OR 'third\* world countr\*' OR 'low\* middle\* income\* nation\*' OR 'third\*world\* nation\*' OR 'underdevelop\* nation\*' OR 'less\* developed nation\*' OR 'low\* income nation\*' OR 'developing nation\*' OR 'least\* developed countr\*' OR 'emerg\* countr\*' OR 'less-developed countr\*' OR 'developing world\*' OR 'undeveloped world\*' OR 'emerg\* world' OR 'Latin\* America\*' OR 'Central\* America\*' OR 'Caribbean' OR 'South\* America\*' OR 'Africa\*' OR 'Asia\*' OR 'Pacific' OR 'Middle\* East\*' OR 'Latin\* America\*' OR 'Central America\*' OR 'South America\*' OR 'Africa\*' OR 'Asia\*' OR 'Pacific' OR 'Middle East\*' OR 'Afghanistan' OR 'Albania' OR 'Algeria' OR 'American Samoa' OR 'Angola' OR 'Argentina' OR 'Armenia' OR 'Azerbaijan' OR 'Bangladesh' OR 'Belarus' OR 'Belize' OR 'Benin' OR 'Bhutan' OR 'Bolivia' OR 'Bosnia\*Herzegovina' OR 'Botswana' OR 'Brazil' OR 'Bulgaria' OR 'Burkina Faso' OR 'Burundi' OR 'Cabo Verde' OR 'Cambodia' OR 'Cameroon' OR 'Central African Republic' OR 'Chad' OR 'China' OR 'Colombia' OR 'Comoros' OR 'Congo, Dem\* Rep\*' OR 'Congo, Rep\*' OR 'Costa Rica' OR 'Cote d'Ivoire' OR 'Cuba' OR 'Djibouti' OR 'Dominica' OR 'Dominican Republic' OR 'Ecuador' OR 'Egypt' OR 'El Salvador' OR 'Equatorial Guinea' OR 'Eritrea' OR 'Ethiopia' OR 'Fiji' OR 'Gabon' OR 'Gambia' OR 'Georgia' OR 'Ghana' OR 'Grenada' OR 'Guatemala' OR 'Guinea' OR 'Guinea-Bissau' OR 'Guyana' OR 'Haiti' OR 'Honduras' OR 'India' OR 'Indonesia' OR 'Iran' OR 'Iraq' OR 'Jamaica' OR 'Jordan' OR 'Kazakhstan' OR 'Kenya' OR 'Kiribati' OR 'Korea, Dem\* People's Rep\*' OR 'North Korea' OR 'Kosovo' OR 'Kyrgyz' OR 'Lao' OR 'Lebanon' OR 'Lesotho' OR 'Liberia' OR 'Libya' OR 'Macedonia' OR 'Madagascar' OR 'Malawi' OR 'Malaysia' OR 'Maldives' OR 'Mali' OR 'Marshall Islands' OR 'Mauritania' OR 'Mauritius' OR Mexico' OR 'Micronesia' OR 'Moldova' OR 'Mongolia' OR 'Montenegro' OR 'Morocco' OR 'Mozambique' OR 'Myanmar' OR 'Namibia' OR 'Nepal' OR 'Nicaragua' OR Niger' OR 'Nigeria' OR 'Pakistan' OR 'Palau' OR 'Palestine' OR 'Panama' OR 'Papua New Guinea' OR 'Paraguay' OR 'Peru' OR 'Philippines' OR 'Romania' OR 'Russian Federation' OR 'Russia' OR 'Rwanda' OR 'Samoa' OR 'Sao Tome and Principe' OR 'Senegal' OR 'Serbia' OR 'Sierra Leone' OR 'Solomon Islands' OR 'Somalia' OR 'South Africa' OR 'South Sudan' OR 'Sri Lanka' OR 'St. Lucia' OR 'St. Vincent and the Grenadines' OR 'Sudan' OR 'Suriname' OR 'Swaziland' OR 'Syrian Arab Republic' OR 'Syria' OR 'Tajikistan' OR 'Tanzania' OR 'Thailand' OR 'Timor-Leste' OR 'East Timor' OR 'Togo' OR 'Tonga' OR 'Tunisia' OR 'Turkey' OR 'Turkmenistan' OR 'Tuvalu' OR 'Uganda' OR 'Ukraine' OR 'Uzbekistan' OR 'Vanuatu' OR 'Venezuela' OR 'Vietnam' OR 'West Bank\* Gaza' OR 'Yemen' OR 'Zambia' OR 'Zimbabwe').mp. [mp=title, abstract, original title, name of substance word, subject heading word, keyword heading word, protocol supplementary concept word,

rare disease supplementary concept word, unique identifier, synonyms]

8. Developing countries/ OR Argentina/ OR Bolivia/ OR Brazil/ OR Colombia/ OR Ecuador/ OR Guyana/ OR Paraguay/ OR Peru/ OR Suriname/ OR Venezuela/ OR exp Latin America/ OR exp Caribbean Region/ OR exp Central America/ OR exp Africa/ OR esp Central Asia/ OR exp Northern Asia/ OR Cambodia/ OR Timor-Leste/ OR Indonesia/ OR Laos/ OR Malaysia/ OR Myanmar/ OR Philippines/ OR Thailand/ OR Vietnan/ OR Bangladesh/ OR Buthan/ OR exp India/ OR Nepal/ OR Pakistan/ OR Sri Lanka/ OR Afghanistan/ OR Iran/ OR Iraq/ OR Jordan/ OR Lebanon/ OR Syria/ OR Turkey/ OR Yemen/ OR exp China/ OR Mongolia/ OR Democratic People’s Republic of Korea/ OR Balkan Peninsula/ OR Albania/ OR Bosnia and Herzegovina/ OR Bulgaria/ OR Kosovo/ OR Macedonia/ OR Moldova/ OR Montenegro/ OR exp Republic of Belarus OR Romania/ OR exp Russia/ OR Serbia/ OR Ukraine/ OR exp Transcaucasia/ OR Comoros/ OR Madagascar/ OR Mauritius/ OR Indonesia/ OR Fiji/ OR Papua New Guinea/ OR Vanuatu/ OR Palau/ OR exp Samoa/ OR Tonga/ OR Cuba/ OR Dominica/ OR Dominican Republic/ OR Grenada/ OR Haiti/ OR Jamaica/ OR St. Lucia/ OR St. Vincent and the Grenadines/

9. 7 {or/and} 8

10. 3 and 6 and 9

11. Limit 10 to (full text and yr="2007 -Current" and (English or Portuguese or Spanish))

| Search | Free text words - Portuguese (MeSH terms only available in English)                                                                                                                                                                                                                                                                                                                                                                                                                                                                                                                                                                                                                                                                                                                                                                                                                                                                                                                                                                                                                                                                                                                                                                                          |
|--------|--------------------------------------------------------------------------------------------------------------------------------------------------------------------------------------------------------------------------------------------------------------------------------------------------------------------------------------------------------------------------------------------------------------------------------------------------------------------------------------------------------------------------------------------------------------------------------------------------------------------------------------------------------------------------------------------------------------------------------------------------------------------------------------------------------------------------------------------------------------------------------------------------------------------------------------------------------------------------------------------------------------------------------------------------------------------------------------------------------------------------------------------------------------------------------------------------------------------------------------------------------------|
| #1     | <p>“atenção primár* saúde” OR “cuidado* primár*” OR “saúde primár*” OR “gestão* saúde” OR “manej* saúde” OR “interven* saúde* primár*” OR “program* preven*” OR “interven* preven*” OR “interven* precoce*” OR “estratégi* saúde primár*” OR “promoç* d* saúde” OR “saúde integral*” OR “saúde* comuni*” OR “saúde* família*” OR “saúde públic*” OR “sistema* saúde*” OR “trabalhador* saúde” OR “agente* saúde” OR “profissiona* saúde” OR “polític* saúde” OR “cuidado* pré-nata*” OR “ambulator* pré-nata*” OR “saúde básic*” OR “atenç* básic*” OR “centro* saúde” OR “posto* saúde” OR “unidade* saúde”</p>                                                                                                                                                                                                                                                                                                                                                                                                                                                                                                                                                                                                                                             |
| #2     | <p>“violen* parceir*” OR “abus* parceir*” OR “violen* conjug*” OR “abus* conjug*” OR “agress* parceir*” OR “violen* contra* mulher*” OR “mulher* espancada*” OR “violen* namor*” OR “abus* namor*” OR “violen* gênero” OR “abus* gênero”</p>                                                                                                                                                                                                                                                                                                                                                                                                                                                                                                                                                                                                                                                                                                                                                                                                                                                                                                                                                                                                                 |
| #3     | <p>“país* renda baixa* média*” OR “país* baixa* média* renda*” OR “país* baixa* renda*” OR “país* renda* média” OR “país* subdesenvolv*” OR “país* em desenvolvimento” OR “país* terceiro mundo” OR “naç* renda baixa* média*” OR “naç* terceiro mundo” OR “naç* subdesenvolv*” OR “naç* menos desenvolvid*” OR “naç* baix* desenvolv*” OR “naç* em desenvolvimento” OR “país* menos desenvolvid*” OR “país* emergente*” OR “país* pobre*” OR “naç* pobre*” OR “mundo em desenvolvimento” OR “mundo subdesenvolvido” OR “mundo emergente” OR “naç* emergente* OR “América Latin*” OR "América Central" OR "América do Sul" OR “Carib*” OR “África*” OR “Ásia*” OR “Pacífico*” OR “Oceania” OR "Oriente Médio" OR "Afeganistão" OR "Albânia" OR "Argélia" OR "Samoa Americana" OR "Angola" OR "Argentina" OR "Armênia" OR "Azerbaijão" OR "Bangladesh" OR "Bielorrússia" OR "Belize" OR "Benin" OR "Butão" OR "Bolívia" OR "Bósnia* Herzegovina" OR "Botswana" OR "Brasil" OR "Bulgária" OR “Burkina Faso” OR "Burundi" OR "Cabo Verde" OR "Camboja" OR "Camarões" OR "República Centro-Africana" OR "Chade" OR "China" OR "Colômbia" OR "Comores" OR "Congo, Dem* Rep*” OR "Congo, Rep*” OR "Costa Rica" OR "Costa do Marfim" OR "Cuba" OR "Djibouti” OR</p> |

|                                                                                                                                                                                                                                                                                                                                                                                                                                                                                                                                                                                                                                                                                                                                                                                                                                                                                                                                                                                                                                                                                                                                                                                                                                                                                                                                                                                                                                                                                                                                                                                                                                                                         |
|-------------------------------------------------------------------------------------------------------------------------------------------------------------------------------------------------------------------------------------------------------------------------------------------------------------------------------------------------------------------------------------------------------------------------------------------------------------------------------------------------------------------------------------------------------------------------------------------------------------------------------------------------------------------------------------------------------------------------------------------------------------------------------------------------------------------------------------------------------------------------------------------------------------------------------------------------------------------------------------------------------------------------------------------------------------------------------------------------------------------------------------------------------------------------------------------------------------------------------------------------------------------------------------------------------------------------------------------------------------------------------------------------------------------------------------------------------------------------------------------------------------------------------------------------------------------------------------------------------------------------------------------------------------------------|
| <p>"Dominica" OR "República Dominicana" OR "Equador" OR "Egito" OR "El Salvador" OR "Guiné Equatorial" OR "Eritreia" OR "Etiópia" OR "Fiji" OR "Gabão" OR "Gâmbia" OR "Geórgia" OR "Gana" OR "Granada" OR "Guatemala" OR "Guiné" OR "Guiné-Bissau" OR "Guiana" OR "Haiti" OR "Honduras" OR "Índia" OR "Indonésia" OR "Irã" OR "Iraque" OR "Jamaica" OR "Jordânia" OR "Cazaquistão" OR "Quênia" OR "Kiribati" OR "Coréia, Rep* Dem*" OR "Coréia do Norte" OR "Kosovo" OR "Quirguistão" OR "Laos" OR "Líbano" OR "Lesoto" OR "Libéria" OR "Líbia" OR "Macedônia" OR "Madagascar" OR "Malawi" OR "Malásia" OR "Maldivas" OR "Mali" OR "Ilhas Marshall" OR "Mauritânia" OR "Mauríci*" OR "México" OR "Micronésia" OR "Moldávia" OR "Mongólia" OR "Montenegro" OR "Marrocos" OR "Moçambique" OR "Mianmar" OR "Namíbia" OR "Nepal" OR "Nicarágua" OR Níger " OR "Nigéria" OR "Paquistão" OR "Palau" OR "Panamá" OR "Papua Nova Guiné" OR "Paraguai" OR "Peru" OR "Filipinas" OR "Romênia" OR "Federação Russa" OR "Rússia" OR "Ruanda" OR "Samoa" OR "São Tomé e Príncipe" OR "Senegal" OR "Sérvia" OR "Serra Leoa" OR "Ilhas Salomão" OR "Somália" OR "África do Sul" OR "Sudão do Sul" OR "Sri Lanka" OR "St. Lucia" OR "São. Vincente e Granadinas" OR "Sudão" OR "Suriname" OR "Suazilândia" OR "República Árabe da Síria" OR "Síria" OR "Tajiquistão" OR "Tanzânia" OR "Tailândia" OR "Timor-Leste" OR "Timor* Leste" OR "Togo" OR "Tonga" OR "Tunísia" OR "Turquia" OR "Turcomenistão" OR "Tuvalu" OR "Uganda" OR "Ucrânia" OR "Uzbequistão" OR "Vanuatu" OR "Venezuela" OR "Vietn*" OR "Cisjordânia" OR "Gaza" OR "Palestina" OR "Iêmen" OR "Zâmbia" OR "Zimbábue"</p> |
|-------------------------------------------------------------------------------------------------------------------------------------------------------------------------------------------------------------------------------------------------------------------------------------------------------------------------------------------------------------------------------------------------------------------------------------------------------------------------------------------------------------------------------------------------------------------------------------------------------------------------------------------------------------------------------------------------------------------------------------------------------------------------------------------------------------------------------------------------------------------------------------------------------------------------------------------------------------------------------------------------------------------------------------------------------------------------------------------------------------------------------------------------------------------------------------------------------------------------------------------------------------------------------------------------------------------------------------------------------------------------------------------------------------------------------------------------------------------------------------------------------------------------------------------------------------------------------------------------------------------------------------------------------------------------|

| Search | Free text words - Spanish (MeSH terms only available in English)                                                                                                                                                                                                                                                                                                                                                                                                                                                                                                                                                                                                                                                                                                                                                                                                                                                                                                             |
|--------|------------------------------------------------------------------------------------------------------------------------------------------------------------------------------------------------------------------------------------------------------------------------------------------------------------------------------------------------------------------------------------------------------------------------------------------------------------------------------------------------------------------------------------------------------------------------------------------------------------------------------------------------------------------------------------------------------------------------------------------------------------------------------------------------------------------------------------------------------------------------------------------------------------------------------------------------------------------------------|
| #1     | <p>“atenci* primar* salud” OR “atenci* primar*” OR “cuidado* primar*” OR “salud primar*” OR “gestion* salud” OR “manej* salud” OR “interven* primar* salud*” OR “program* OR interven*” OR “interven* tempran*” OR “estrateg* salud primar*” OR “promoc* salud” OR “salud integral*” OR “salud* comuni*” OR “salud* famili*” OR “salud public*” OR “sistema* salud” OR “trabajad* salud” OR “agente* salud” OR “profession* salud” OR “politic* salud” OR “cuidado prenatal*” OR “clínica* prenatal*” OR “salud basic*” OR “atenci* basic*” OR “primer nivel de atención” OR “centro* de salud” OR “puesto* de salud” OR “posta* médica*”</p>                                                                                                                                                                                                                                                                                                                                |
| #2     | <p>“violen* pareja*” OR “abuso* pareja*” OR “violencia conyug*” OR “abuso conyug*” OR “daño* pareja*” OR “violen* contra la* mujer*” OR “abus* contra la* mujer*” OR “mujer* golpeada*” OR “mujer* maltratada*” OR “violen* contra la* enamora*” OR “abus* contra la* enamora*” OR “violencia de género” OR “abuso de género” OR “violencia de* compañer* íntim*” OR “mujer* violentada*”</p>                                                                                                                                                                                                                                                                                                                                                                                                                                                                                                                                                                                |
| #3     | <p>“país* con ingreso mediano* bajo*” OR “país* con ingreso bajo* OR “país* subdesarrollado*” OR “país* en desarrollo*” OR “país* tercer mundo” OR “nacion* con ingreso mediano* bajo*” OR “nacion* del tercer mundo” OR “nacion* subdesarrollada*” OR “nacion* menos desarroll*” OR “nacion* con bajo desarroll*” OR “nacion* en desarrollo” OR “país* menos desarroll*” OR “país* menos desarroll*” OR “país* emergente*” OR “nacion* emergente*” OR “mundo emergente” OR “mundo subdesarrollado” OR “país* en vías de desarrollo” OR “Caribe” OR “América Latina*” OR “América del Sur” OR “Sudamérica” “África*” OR “Asia*” OR “Pacífico” OR “Oriente Medio” OR “Afganistán” OR “Albania” OR “Argelia” OR “Angola” OR “Argentina” OR “Samoa Americana” OR “Armenia” OR “Azerbaiyán” OR “Bangladesh” OR “Bielorrusia” OR “Belice” OR “Benin” OR “Bolivia” OR “Bosnia* Herzegovina” OR “Botswana” OR “Brasil” OR “Bulgaria” OR “Burkina Faso” OR “Burundi” OR “Bhutan”</p> |

OR "Cabo Verde" OR "Camboya" OR "Camerún" OR "República Centroafricana" OR "Chad" OR "China" OR "Costa Rica" OR "Costa de Marfil" OR "Cuba" OR "Djibouti" OR "Dominica" OR "Costa Rica" OR "Colombia" OR "Comoras" OR "Congo, Rep\*" OR "República Dominicana" OR "Ecuador" OR "Egipto" OR "El Salvador" OR "Guinea Ecuatorial" OR "Eritrea" OR "Etiopía" OR "Fiji" OR "Gabón" OR "Georgia" OR "Gambia" OR "Ghana" OR "Grenada" OR "Guatemala" OR "Guinea" OR "Guinea-Bissau" OR "Guyana" OR "Haití" OR "Honduras" OR "India" OR "Indonesia" OR "Iran" OR "Irak" OR "Jamaica" OR "Jordania" OR "Kazajstán" OR "Kenia" OR "Kiribati" OR "Corea, República Democrática" OR "Corea del Norte" OR "Kosovo" OR "Laos" OR "Líbano" OR "Lesotho" OR "Liberia" OR "Libia" OR "Macedonia" OR "Madagascar" OR "Malawi" OR "Malasia" OR "Maldivas" OR "Mali" OR "Islas Marshall" OR "Mauritania" OR "Maurici\*" OR "México" OR "Micronesia" OR "Moldavia" OR "Mongolia" OR "Montenegro" OR "Marruecos" OR "Mozambique" OR "Myanmar" OR "Namibia" OR "Nepal" OR "Nicaragua" OR "Níger" OR "Nigeria" OR "Pakistán" OR "Palau" OR "Panamá" OR "Papúa Nueva Guinea" OR "Paraguay" OR "Perú" OR "Filipinas" OR "Rumania" OR "Rusia" OR "Rwanda" OR "Samoa" OR "Santo Tomé y Príncipe" OR "Senegal" OR "Serbia" OR "Sierra Leona" OR "Somalia" OR "Sudáfrica" OR "Sudán del Sur" OR "Sri Lanka" OR "St. Lucia" OR "Siria" OR "Tayikistán" OR "Tanzania" OR "Tailandia" OR "Timor Oriental" OR "República Democrática del Congo" OR "Tonga" OR "Túnez" OR "Turquía" OR "Turkmenistán" OR "Tuvalu" OR "Uganda" OR "Ucrania" OR "Uzbekistán" OR "Vanuatu" OR "Venezuela" OR "Vietnam" OR "Cisjordania\*" OR "Gaza" OR "Palestina" OR "Yemen" OR "Zambia" OR "Zimbabwe"

This search strategy can be adapted and modified according to each electronic database.



**Appendix 3 -PRISMA Flow Diagram: flow of information through different phases of a systematic review**

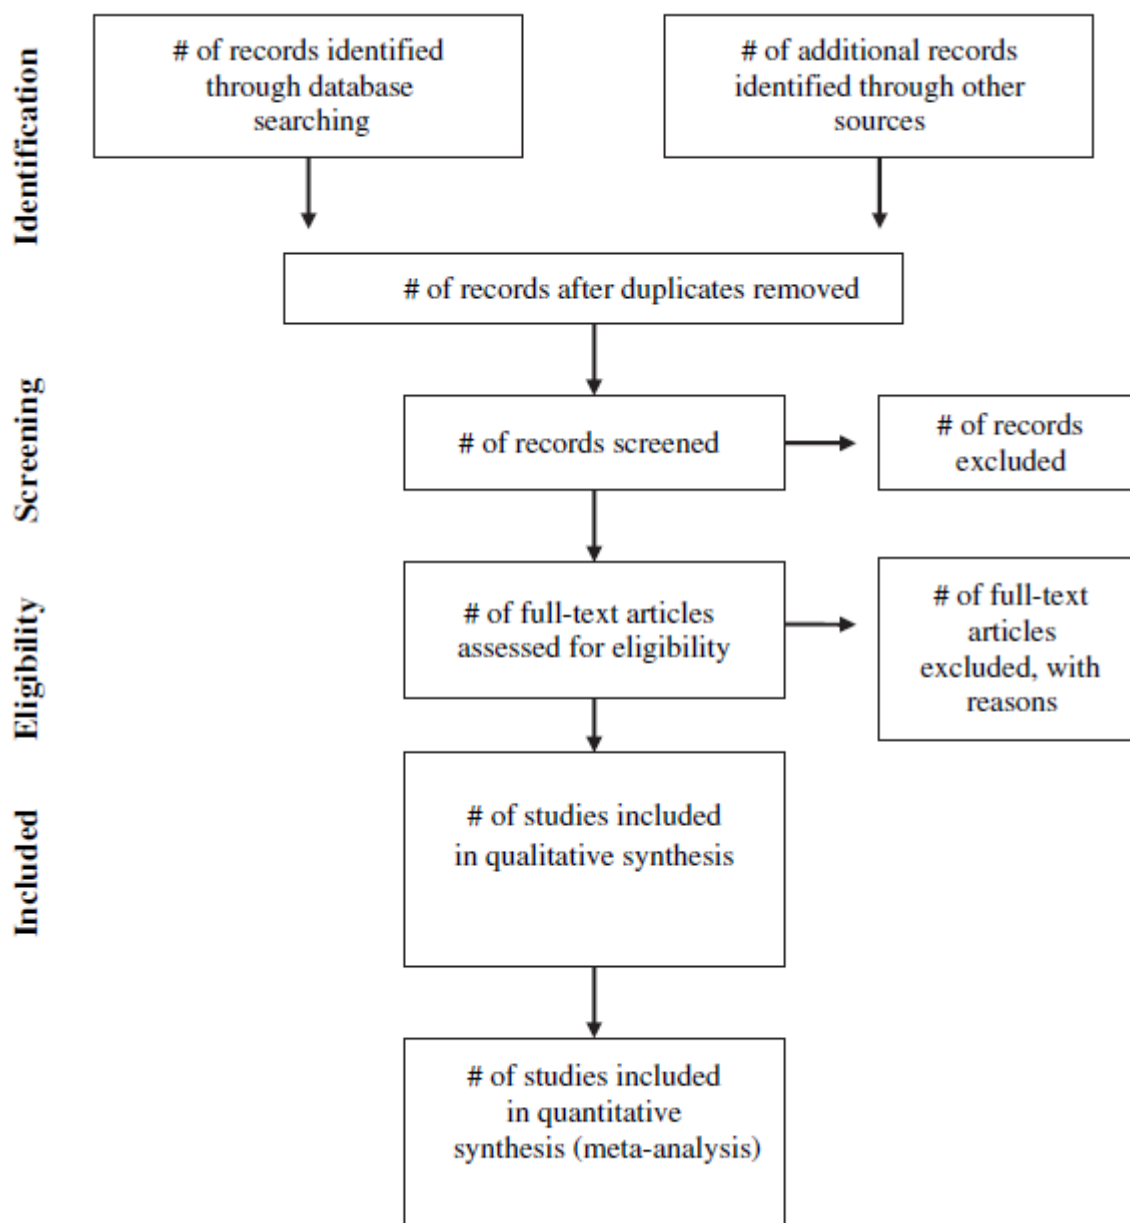

48 Source: Moher D, Liberati A, Tetzlaff J, et al. Preferred reporting items for systematic reviews and meta-  
49 analyses: the PRISMA statement. PLoS Med 2009;6:e1000097 doi:10.1371/journal.pmed.1000097 [published  
50 Online: 21 July 2009].  
51  
52  
53  
54  
55  
56  
57  
58  
59  
60

## Appendix 4 - Data Items

### 1. General Information and characteristics of the studies

- a. Author's name
- b. Journal
- c. Year of publication
- d. Country of the intervention
- e. Context (urban/rural)
- f. Type of service/setting
- g. Participants (e.g. workers, users - victims, family members, perpetrators)

### 2. Methodology

- a. Study design
- b. Type of intervention
- c. Sample/number of participants
- d. Year(s) when intervention was conducted
- e. Data collection
- f. Measures
- g. Analysis
- h. Ethics clearance

### 3. Impacts/outcomes of the intervention for survivors:

- a. IPV rates
- b. health (e.g. physical, mental)
- c. safety (e.g. safety plans)
- d. wellbeing (e.g. quality of life)
- e. children (e.g. children's health and wellbeing)
- f. Other Impacts/outcomes (if described)
- g. Barriers and facilitators for survivors (if investigated)

### 4. Impacts/outcomes of the intervention for PHC workers:

- a. Types of workers (e.g. nurses, community health workers, receptionists)
- b. Worker's role in the intervention
- c. Measures of impacts/outcomes concerned to workers
- d. Barriers and facilitators for workers (if described)

### 5. Role of the PHC services and public health systems to improve survivors' healthcare:

- a. Measures of impacts/outcomes of the intervention for services/systems
- b. Impacts/outcomes of the intervention for policies and organizational structure
- c. Articulation with other levels of care in the healthcare system (e.g. hospital, emergency, etc.)
- d. Articulation with other sectors beyond public health (e.g. police, justice, housing, etc.)
- e. Costs
- f. Sustainability
- g. Barriers and facilitators for services/systems (if described)

### 6. Other relevant information



# BMJ Open

## Voices from low-and-middle-income countries: a systematic review protocol of primary health care interventions within public health systems addressing intimate partner violence against women

|                                 |                                                                                                                                                                                                                                                                                                                                                                                                                                                                                                                                                                      |
|---------------------------------|----------------------------------------------------------------------------------------------------------------------------------------------------------------------------------------------------------------------------------------------------------------------------------------------------------------------------------------------------------------------------------------------------------------------------------------------------------------------------------------------------------------------------------------------------------------------|
| Journal:                        | <i>BMJ Open</i>                                                                                                                                                                                                                                                                                                                                                                                                                                                                                                                                                      |
| Manuscript ID                   | bmjopen-2017-019266.R1                                                                                                                                                                                                                                                                                                                                                                                                                                                                                                                                               |
| Article Type:                   | Protocol                                                                                                                                                                                                                                                                                                                                                                                                                                                                                                                                                             |
| Date Submitted by the Author:   | 21-Nov-2017                                                                                                                                                                                                                                                                                                                                                                                                                                                                                                                                                          |
| Complete List of Authors:       | Signorelli, Marcos; Universidade Federal do Parana, Collective Health<br>Hillel, Stav; La Trobe University - Melbourne Campus, Library<br>de Oliveira, Daniel; Universidade Federal do Rio Grande do Sul, Collective Health<br>Ayala Quintanilla, Beatriz; La Trobe University College of Science Health and Engineering, Judith Lumley Centre; Peruvian National Institute of Health, Lima<br>Hegarty, Kelsey; University of Melbourne, Dept of General Practice; The Royal Women's Hospital<br>Taft, Angela; La Trobe University, Mother and Child Health Research |
| <b>Primary Subject Heading</b>: | Public health                                                                                                                                                                                                                                                                                                                                                                                                                                                                                                                                                        |
| Secondary Subject Heading:      | Health services research, General practice / Family practice                                                                                                                                                                                                                                                                                                                                                                                                                                                                                                         |
| Keywords:                       | PUBLIC HEALTH, INTIMATE PARTNER VIOLENCE, LOW-AND-MIDDLE-INCOME COUNTRIES, PRIMARY CARE, SYSTEMATIC REVIEW                                                                                                                                                                                                                                                                                                                                                                                                                                                           |
|                                 |                                                                                                                                                                                                                                                                                                                                                                                                                                                                                                                                                                      |

SCHOLARONE™  
Manuscripts

**Title:** Voices from low-and-middle-income countries: a systematic review protocol of primary health care interventions within public health systems addressing intimate partner violence against women

**Authors:**

1. Signorelli, MC.

Ph.D. in Public Health

Postdoctoral Fellow, La Trobe University

Lecturer, Federal University of Parana

Rua Jaguariaíva, 512. Matinhos/PR - Brazil

T:+55 41 3511 8326

E: [signorelli.marcos@gmail.com](mailto:signorelli.marcos@gmail.com)

2. Hillel, S.

Senior Learning Advisor (Library), La Trobe University

Plenty Road & Kingsbury Drive, Bundoora VIC 3086

T: 03 9479 6097

E: [s.hillel@latrobe.edu.au](mailto:s.hillel@latrobe.edu.au)

3. Oliveira, DC.

PhD in Health Sciences

Lecturer, Federal University of Rio Grande do Sul

Porto Alegre/RS, Brazil

T: +55 51 98344 5848

E: [daniel.canavese@gmail.com](mailto:daniel.canavese@gmail.com)

4. Ayala Quintanilla, BP.

Ph.D. candidate, Judith Lumley Centre, La Trobe University

Melbourne/VIC, Australia

T: 03 9479 8784

E: [17801497@students.latrobe.edu.au](mailto:17801497@students.latrobe.edu.au)

5. Hegarty K,

Ph.D. in Preventive Medicine

Professor of Family Violence Prevention, The Royal Women's Hospital, Melbourne

Professor, Department of General Practice, The University of Melbourne

Melbourne/VIC, Australia

E: [k.hegarty@unimelb.edu.au](mailto:k.hegarty@unimelb.edu.au)

6. Taft A.

Ph.D. in Public Health

1  
2  
3 Professor, Judith Lumley Centre, La Trobe University

4 Melbourne/VIC, Australia

5  
6 E: a.taft@latrobe.edu.au  
7

8  
9 Word count: 4847 (excluding title, abstract, strengths & limitations, references and appendixes)  
10  
11  
12  
13  
14  
15  
16  
17  
18  
19  
20  
21  
22  
23  
24  
25  
26  
27  
28  
29  
30  
31  
32  
33  
34  
35  
36  
37  
38  
39  
40  
41  
42  
43  
44  
45  
46  
47  
48  
49  
50  
51  
52  
53  
54  
55  
56  
57  
58  
59  
60

## ABSTRACT

**Introduction:** Intimate partner violence (IPV) considerably harms the health, safety, and wellbeing of women. In response, public health systems around the globe have been gradually implementing strategies. In particular, low- and middle-income countries (LMIC) have been developing innovative interventions in primary health care (PHC) addressing the problem. This paper describes a protocol for a systematic review of studies addressing the impacts and outcomes of PHC centre interventions addressing IPV against women from LMIC.

**Methods and analysis:** A systematic search for studies will be conducted in African Index Medicus, Africa Portal Digital Library, CINAHL, Embase, Index Medicus for the South-East Asia Region, IndMed, LILACS, Medecins Sans Frontieres, Medline, Minority Health and Health Equity Archive, ProQuest, PsychInfo, SciELO, and Social Policy and Practice. Studies will be in English, Spanish, and Portuguese, published between 2007 and 2017, addressing IPV against women from LMIC, whose data quantitatively report on the impacts and outcomes for survivors and/or workers and/or public health systems pre- and post-intervention. Two trilingual reviewers will independently screen for study eligibility and data extraction, and a librarian will cross check for compliance. Risk of bias and quality assessment of studies will be measured according to: (1) the Cochrane Collaboration's tool for assessing risk of bias for randomised controlled trials; and (2) the methodological index for non-randomised studies (MINORS). Data will be analysed and summarised using meta-analysis and narrative description of the evidence across studies. This systematic review will be reported according to the Preferred Reporting Items for Systematic Reviews and Meta-Analyses Protocols (PRISMA-P) guidelines.

**Ethics and dissemination:** This systematic review will be based on published studies, thus not requiring ethical approval. Findings will be presented in conferences and published in a peer-reviewed journal.

**Trial registration number:** International Prospective Register for Systematic Reviews (PROSPERO) number CRD42017069261

### Strengths and limitations of this study

- The comprehensive search strategy of this systematic review will allow identification of a range of interventions from different LMIC published in peer-reviewed journals in English, Spanish and Portuguese.
- This protocol is co-authored by researchers from LMIC, who are native-speakers of the languages included in this systematic review. This can strengthen the review process given linguistic and cultural aspects of the diverse studies will be recognised.
- The review intends to promote voices from LMIC, who otherwise may go unheard, given relative financial barriers of LMIC research institutions and the publication bias to English.
- It is expected that there will be some variability related to methodological diversity and outcomes of the reviewed studies, due to the broad scope of PHC interventions addressing IPV, making it challenging to compare outcomes across different scenarios.

## INTRODUCTION

Intimate partner violence (IPV) is the most prevalent type of violence against women<sup>1,2</sup>. The World Health Organization (WHO) estimates that one in three women experience physical or sexual IPV during their lifetime<sup>1</sup>. IPV against women is defined by the WHO as any behaviour within an intimate relationship that causes physical damage, psychological or sexual abuse to a woman in the

relationship, including physical assault, psychological abuse, forced intercourse, and other forms of sexual coercion and of controlling behaviours<sup>2</sup>.

The consequences of IPV for women's health have been extensively described, demonstrating that abused women have poorer health compared to women who have never been abused<sup>3 4</sup>. There are a wide range of consequences including: a) physical health, such as injuries, traumas, cardiovascular effects<sup>5</sup>; b) mental health, including depression, anxiety, post-traumatic stress disorder (PTSD), alcohol and drug abuse and suicide<sup>6</sup>; c) sexual and reproductive health, including sexually transmitted diseases (STD), miscarriage, reduced contraception and sexual autonomy<sup>7</sup>. The consequences are not only for women, but also for their children, including increased risk for low birth weight, preterm delivery, and neonatal death<sup>7</sup>.

IPV against women is a common problem all over the world, but multicountry studies, such as the one developed by the WHO<sup>3</sup>, which compared ten different income range countries, reveal higher prevalence and the worst consequences for women from low-and-middle-income countries (LMIC)<sup>3</sup>. The World Bank classifies all countries by income, based on the gross national income (GNI) per capita per year<sup>8</sup>. This review comprises the LMIC, which are the countries with a GNI per capita  $\leq$  US\$12,475 per year, as of March, 2017.

IPV has been recognized as a public health issue and included in the agendas of public health systems worldwide<sup>2</sup>. The WHO Sustainable Development Goal number 5 aims to achieve gender equality and empower all women and girls. It includes two subitems targeting violence specifically: 5.1 'End all forms of discrimination against all women and girls everywhere'; and 5.2 'Eliminate all forms of violence against all women and girls in the public and private spheres, including trafficking and sexual and other types of exploitation'<sup>9</sup>. The World Health Assembly in 2016 recommended actions<sup>10</sup>, such as: strengthening health system leadership to prevent interpersonal violence and improving health workers'/providers' capacity to respond to violence, in particular against women and children.

Each country responds differently to the problem in the health arena, and exchanging experiences can be a significant opportunity to foster local debate and action<sup>11</sup>. This systematic review focuses on experiences conducted within public health systems, and more specifically, in primary health care setting. Public health systems consist of systems provided and/or funded by governments aiming to promote the health of their citizens, considering health as a human right<sup>12 13</sup>. Public health systems intend to ensure that everyone has access to appropriate, efficient and quality health services, aiming for equity of access to health services for all populations<sup>14</sup>. Public health systems can have a crucial role in a multisector response to IPV, but it requires changes in the systems, coordinated planning and actions, for example, targeting different levels of care, such as primary health care (PHC)<sup>15</sup>.

Primary health care can be considered both a philosophy and a system response to reducing health inequities and ameliorating the effects of disadvantage<sup>16</sup>. PHC is the first level of contact individuals, families and communities have with the healthcare system<sup>17</sup>. As it has a broad scope, in this study we adopt a more recent definition of PHC, consisting of 'a socially appropriate, universally accessible, scientifically sound first level care provided by health services and systems with a suitably trained workforce comprised of multidisciplinary teams supported by integrated referral systems in a way that: gives priority to those most in need and addresses health inequalities; maximises community and individual self-reliance, participation and control; and involves collaboration and partnership with other sectors to promote public health'<sup>18</sup>.

Globally, numerous LMIC are developing innovative interventions addressing IPV against women with a focus on PHC<sup>19</sup>. However, some of these interventions may go unnoticed by mainstream researchers from high-income countries. Our hypothesis is that this could be related to different factors, such as: 1) the high costs for the development of complex interventions considered the gold standard of research (e.g.: randomised controlled trials); 2) high publication costs in prestigious academic journals, accompanied by high standards which are difficult to achieve by LMIC researchers given scarce resources, and; 3) linguistic barriers, as writing papers in English—the dominant language for publication in prestigious journals of high income countries—can be very expensive for non-English speaking researchers. However, such interventions developed in LMIC are

not necessarily low quality studies. Indeed, they can be scalable and generalisable, affording insights for public health systems in other contexts, including both high-income countries and LMIC.

While previous reviews have been published in this area, they are either not systematic reviews<sup>20 21</sup>, or if systematic, did not focus solely on LMIC<sup>22</sup>. Or if focusing on LMIC, did not target specifically health systems nor PHC<sup>23</sup>. Moreover, none of the extant systematic reviews include studies in Spanish or Portuguese, nor searched regional databases for literature. Thus, this will be the first systematic review addressing IPV interventions in PHC from LMIC to include studies in English, Spanish, and Portuguese, retrieved from, amongst others, regional databases.

The focus of this systematic review on PHC rather than the whole health system, because PHC is usually the first point of entrance for women in the health system, especially in LMIC. From our previous studies<sup>24-26</sup> and the literature<sup>22</sup>, we noticed that PHC approaches to deal with IPV have some particularities, which are different from other levels of care, such as hospital settings, for example. The routines, professional training and strategies to prevent or reduce IPV can be very different across different levels of care, especially regarding low-and-middle-income contexts<sup>21 23</sup>. Consequently, the target of this review on PHC is to bring visibility to strategies conducted in this specific level of care, which is the least expensive and with greatest coverage<sup>27-29</sup>. We consider that this is of particular interest for LMIC, that could have an opportunity to manage the problem in the PHC system, with fewer resources and covering more people, compared to other levels of care. We believe that evidence from interventions developed within primary health systems from certain LMIC could provide reflections to support public health policy makers and managers to implement feasible interventions in greater scale and/or other countries.

## REVIEW QUESTIONS

- 1) To what extent do primary health care interventions within public health systems improve the health, safety and wellbeing of women survivors of IPV in LMIC?
- 2) What are the main impacts and outcomes of these interventions for PHC workers' practices and the sustainability of these practices for public health systems?

## OBJECTIVES

To conduct a systematic review of quantitative studies focusing on primary health care interventions in LMIC, with the aim of prevention or reduction of IPV alongside the improvement of survivors' health, safety and wellbeing.

## METHODS

This systematic review will be conducted and reported according to the guidelines of the Preferred Reporting Items for Systematic Reviews and Meta-Analysis Protocols (PRISMA-P)<sup>30 31</sup>, which includes the use of the PRISMA-P checklist (see appendix 1), following methodological approaches published in previous studies<sup>32</sup>. The review will be published according to the recommended items for systematic reviews based on the PRISMA statement<sup>32</sup>. This review will also be informed by the guidelines of the Cochrane Handbook<sup>33</sup> for systematic reviews of interventions to reinforce rigour along the process.

## Study registration

This systematic review is registered in the PROSPERO International Prospective Register of Systematic Reviews with number CRD42017069261.  
([http://www.crd.york.ac.uk/PROSPERO/display\\_record.asp?ID=CRD42017069261](http://www.crd.york.ac.uk/PROSPERO/display_record.asp?ID=CRD42017069261))

## Types of studies

In this review we will include studies with quantitative pre-and-post evaluation concerning PHC interventions of IPV against women from LMIC developed within their respective public health systems. For the purposes of this review, we will consider interventions as proposed by Blankenship<sup>34</sup>, consisting on actions generally taken by outsiders (often read experts), but including individuals and collectives who take actions on their own behalf, purposefully to address a particular risk or disease. This can include individual interventions (focused on individuals' knowledge, attitudes and behaviors) or structural interventions (aiming to change structural factors, such as economic, politico-legal, physical, and social environment). The interventions can include the following experimental and quasi-experimental approaches: randomised controlled trial, non-randomised controlled trial, and quasi-experimental, but also include pre-post designs. We will not include observational studies, qualitative methodologies, or prevalence studies.

We license the inclusion of a broad type of interventions by acknowledging the relatively poor funding allotted to research in LMIC. While cognisant that RCTs, for example, are the gold standard in research, and further, that the Cochrane Collaboration largely recommends methodologically-randomised studies to be the focus of review, we argue that filtering solely for such studies would miss many interventions employed in LMIC - the economic capital in LMIC simply does not allow for it. Given our aim is to "hear voices for the LMIC," and encouraged by the Cochrane's recognition that non-RCTs may be more appropriate at times<sup>33</sup>, our approach is expansive.

## Types of participants and settings

We recognise that the definition of PHC can be very complex, and subject to conceptual debate. For the purpose of this review, we will include any healthcare facility considered as a Primary Healthcare Centre, but restricted to public health services from LMIC. The WHO<sup>35</sup> defines Primary Healthcare Centres as centres providing services which are usually the first point of contact with a health professional. They include services provided by general practitioners, dentists, community nurses, pharmacists and midwives, among others. It can include, for example, General Practice Clinics, Community Based Units, Basic Health Units, Family Health Strategy, Primary Care Home Visits, Day Care Centres, Multicentre Health Clinics and One Stop Crisis Center. This review will not include studies of interventions conducted outside of PHC centres and from the public health systems, such as media campaigns, interventions in schools or in hospitals, which are considered tertiary level of care.

Interventions in PHC for IPV usually focus on workers' strategies to improve survivors' health. This can include healthcare professionals, paraprofessionals, managers and other workers, like receptionists, for example. By 'survivors'<sup>10</sup> we mean any adult women older than 16 years-old affected by IPV and part of the population of an intervention of PHC centres from low- and middle-income countries. This review will target interventions addressed to adult women, because of their particularities, approaches and outcomes, which may be different from those targeting children. The impacts of interventions for children will not be excluded, but they can provide additional information. Consequently, the impact on children will be included in secondary outcomes.

## Intervention(s), exposure

The types of interventions may include: studies about implementation of public policies to reduce/prevent IPV targeting PHC centres; education/training of PHC workers to manage IPV survivors; screening or case-finding IPV in PHC settings; strategies for organizational changes in PHC centres aiming to improve survivors' health, safety or wellbeing; therapeutic interventions for IPV focused in PHC centres.



## Comparator(s)/control

Studies with all types of control conditions will also be included in this review, including no treatment group, treatment as usual, or comparison. We will not limit our review only to studies that compare active interventions with a control condition.

## Types of outcomes measures

### Primary outcomes

Primary outcomes will include the impacts and outcomes of the intervention for:

- a) IPV, measured by validated instruments (such as the Composite Abuse Scale<sup>36</sup>, Index of Spouse Abuse<sup>37</sup>, etc.) or self-reported IPV (even if adopting unvalidated scale).
- b) women's perceived and diagnosed physical, psychological or sexual health and wellbeing, using validated instruments for each domain (such as General Health Questionnaire<sup>38</sup>, Center for Epidemiologic Studies Depression Scale - CESD<sup>39</sup> - Post Traumatic Stress Disorder Checklist<sup>40</sup>, the Short-Form Health Survey - SF-36<sup>41</sup>, etc.).
- c) women's safety, adopting validated or unvalidated measures (such as safety plans, danger assessment<sup>42</sup>, etc.).
- d) PHC workers' practices, that may include identification of abuse by workers; information-giving or safety planning and referral to other services within the public health system (such as hospitals, emergency settings, etc.) or to other services beyond the public health (such as family violence support agencies, police, justice, housing, etc.);

### Other outcomes (secondary outcomes)

Secondary outcomes will include the impacts and outcomes of the intervention for:

- a) children's health and wellbeing, considering intimate partner abuse also affects children, assessments through validated instruments regarding children's health and wellbeing will also be reviewed (such as Child Health Questionnaire – CHQ<sup>43</sup>, etc.).
- b) changes in public health systems' policies and practices, considering policies about system and worker responses; training programs in place; routine data collection; guidelines for workers; funding allocation and cost/benefit measures; and sustainability, considering for this analysis only follow-up evaluations conducted no less than 12 months after the conclusion of the intervention.

## Search strategy

A systematic search will be conducted for literature published between 1 January 2007 and 31 July 2017. We choose this time range given the first multi-country study addressing our question in the context of LMIC was published in 2006<sup>3</sup>.

The following databases will be searched: African Index Medicus, Africa Portal Digital Library, Cumulative Index to Nursing and Allied Health Literature (CINAHL), Embase, Index Medicus for the South-East Asia Region, IndMed, Latin American and Caribbean Health Science Information Database (LILACS), Medecins Sans Frontieres, Medline, Minority Health and Health Equity Archive, ProQuest, PsychInfo, Scientific Electronic Library Online (SciELO), Social Policy and Practice.

This review considers studies published in English, Spanish, and Portuguese, given these are the official languages of 69 of the 145 LMIC (World Bank). Earlier systematic reviews<sup>23</sup> concerning interventions to IPV in LMIC did not consider articles in languages other than English. This review team consists of authors native in the three languages included, minimizing bias related to language. Accordingly, keywords and MeSH will be translated from English by author 1 and reviewed by authors 3 (to Portuguese) and 4 (to Spanish).



1  
2  
3 Authors 1 and 2 independently consider keywords and MeSH headings. Any discrepancies are  
4 subjected to justification. The general search strategy is shown in appendix 2, and will be adapted and  
5 modified appropriately according to each database.

### 6 **Data collection and analysis**

#### 7 **Eligibility criteria of the studies:**

8  
9 The inclusion criteria will be:

- 10 1. Studies from the eligible bibliographic databases with selected (combination of) terms and  
11 keywords (appendix 2).
- 12 2. Peer reviewed articles published in English, Spanish or Portuguese
- 13 3. Studies published between 2007 and 2017.
- 14 4. Interventions related to IPV conducted in PHC centres within the public health systems from  
15 LMIC.
- 16 5. Quantitative pre-and-post studies assessing the impacts and outcomes for survivors (adult  
17 women) and/or workers and/or public health systems.
- 18 6. Primary data collection or existing data set analysis.

19  
20  
21  
22 The exclusion criteria will be:

- 23 1. Studies published in languages other than English, Spanish or Portuguese.
- 24 2. Interventions from non-LMIC or not-conducted in PHC centres or conducted only in the  
25 private health system.
- 26 3. Studies that did not quantitatively assess pre-and-post interventions or that did not describe  
27 the impacts and outcomes for survivors (adult women), workers or public health systems.
- 28 4. Studies that do not include a primary or secondary outcome related to interventions for IPV  
29 against adult women.
- 30 5. Grey literature, including any study protocols, theses, case reports, letters, opinions,  
31 editorials, weekly reports, policy documents, congress abstracts, theoretical papers,  
32 observational studies, qualitative studies or reviews.
- 33 6. Studies published in 2006 or earlier or with the full text not available in the eligible databases.
- 34 7. Duplicate studies that have used the same study population or data. In this case, it will be used  
35 only the most recent or relevant publication, for researches published in more than one  
36 journal.

#### 37 38 39 40 41 **Data management of the studies**

42  
43 COVIDENCE ([www.covidence.org](http://www.covidence.org)) will be employed to manage retrieved studies and to conduct the  
44 systematic review process. The bibliographic software platform Endnote (online version  
45 [www.myendnoteweb.com](http://www.myendnoteweb.com)) will also be used to manage and store relevant studies for this review.  
46 These softwares will remove duplicates thereby cleaning the sample. A checklist will be developed  
47 based on the eligibility criteria of this review. The flow diagram showing the main steps of this  
48 systematic review is available on Appendix 3, following the PRISMA statement<sup>30,31</sup>.

#### 49 50 **Data selection of the studies**

51  
52 The first step consists of the screening of potential studies. This will be done independently and  
53 blinded by two investigators fluent in the three languages included in this review (Authors 1 and 3).  
54 They will analyse titles and abstracts of all non-duplicate papers from the electronic search, assessing  
55 their eligibility. This process of double blinded screening was previously described<sup>44</sup> for rigorous  
56 systematic reviews. Some papers may not describe precisely their abstracts, so a careful search is  
57

1  
2  
3 proposed to maximise the inclusion of studies. Following Ayala-Quintanilla and colleagues<sup>44</sup>, if there  
4 is uncertainty about the inclusion of a certain study in this step, that study will be temporarily  
5 included and will proceed to the next step for more evaluation. Considering all the selected databases  
6 provide an English version of their titles and abstracts, a librarian (Author 2) will cross-check this first  
7 step, comparing the independent results obtained from each investigator and ensuring that all steps  
8 were conducted in compliance with the protocol. If there is any uncertainty between the resultant  
9 studies, the librarian will seek for an opinion from one of the advisors (Authors 5 and 6) that compose  
10 this review team.

11  
12 The second step consists of examining the full version of all selected studies from the first step,  
13 concerning the selection criteria. Two investigators will analyse independently all the articles for each  
14 language. The librarian will double check it this process.

15  
16 The final list of selected studies will be reviewed independently. For each exclusion, justification will  
17 be documented. The results will be compared by the librarian, and any disagreements will be  
18 discussed and if necessary, consultation with a third author will occur to reach the consensus.

### 19 **Appraisal/assessment of the risk of bias of the included studies**

20  
21 It is expected that eligible studies will vary according to their methodological approach. There is a  
22 vast range of tools to assess the quality and bias of studies. Nevertheless, evaluating such biases and  
23 qualities is a challenging task and there is no consensus to conduct it.

24  
25 Grading of Recommendations, Assessment, Development and Evaluation (GRADE)<sup>45</sup> and the  
26 EQUATOR (Enhancing the Quality and Transparency of health Research) Network<sup>46</sup> provide support  
27 with guidelines and tools to evaluate the studies, rating up according to the level of evidence.

28  
29 In this review, to minimize the risk of bias and evaluate the quality of evidence of each article  
30 included, we will adopt: 1) the Cochrane Collaboration's tool for assessing risk of bias for randomised  
31 controlled trials<sup>47</sup>; 2) the Methodological index for non-randomised studies (MINORS)<sup>48</sup> to assess  
32 non-randomised interventional studies. This process will be independently performed by different  
33 authors (two authors for articles written in English, two for studies written in Portuguese, and two for  
34 articles in Spanish) and any disagreement will be discussed and resolved by a third author, if needed.

### 35 **Data extraction**

36  
37 For this third step, three investigators (Authors 1, 3 and 4) will independently and blindly extract all  
38 data items (see appendix 4) of each included study with a standardised data collection form. The first  
39 author will extract data from studies in English and Portuguese. The third author will extract data  
40 from studies in Portuguese and Spanish, while the fourth author will collect from Spanish and  
41 English. All extracted data will be converted into English by authors for articles in Spanish or  
42 Portuguese, to allow the analysis by all authors in a common language for all. To guarantee that no  
43 errors will be made, the librarian (Author 2) will randomly cross-check these data. Any disagreements  
44 will be resolved by consensus between the two authors collecting each language and a third author  
45 (Author 5 or 6) can be arbitrator if consensus is not reached, following other systematic review  
46 protocols<sup>44</sup>.

### 47 **Data items**

48  
49 The descriptive items that will be collected are (see appendix 4): (1) general information and  
50 characteristics of the study, including the country/place, type of service where it was conducted, target  
51 participants and their main sociodemographic characteristics; (2) methodological characteristics,  
52 including the type of method and how data/information were collected, components that were  
53 analysed/; (3) impacts and outcomes for survivors, including IPV rates, women's health, safety and  
54 wellbeing and also impacts for their children; (4) impacts and outcomes for PHC workers, including  
55  
56  
57  
58  
59

1  
2  
3 types of workers, their roles and concerning measures; (5) impacts and outcomes for the public health  
4 systems, including measures of articulation with other levels of care (for example, hospitals,  
5 emergency units, intensive care units, etc) and other sectors beyond the public health (for example,  
6 housing, financing, police, justice, social services, etc), and also evaluation of costs and sustainability  
7 of the intervention. For items 3, 4 and 5, we will also collect information about barriers and  
8 facilitators for each of the three components (survivors, workers and systems), if available.  
9

### 10 11 **Data synthesis and analysis**

12  
13 Data extracted will be analysed and summarised aiming to answer the research questions. Data will be  
14 summarised according to the outcomes: 1) for survivors, including their health, safety and wellbeing  
15 as well as impacts on IPV rates; 2) for PHC workers' practices considering their role to improve  
16 survivors' health care, and 3) for public health systems, including evaluation of costs and  
17 sustainability.  
18

19 When appropriate, a meta-analysis can be conducted, if a sufficient number of trials are identified  
20 with sufficient homogeneity. The meta-analysis will be conducted with aggregate data, rather than at  
21 the individual participant level. Continuous and categorical variables will be summarised according to  
22 the presentation of data of each study. Dichotomous outcome data (yes/no experience of IPV) will be  
23 described as risk ratios with their 95% confidence intervals. It will also be indicated if those findings  
24 were adjusted for confounders. It is anticipated that there will be some variability of reporting impacts  
25 and outcomes of interventions across studies. In this case, a narrative description of the available  
26 evidence will be conducted instead. This will consider which results are significant and their  
27 association with the outcomes, based on data availability across studies.  
28

29 This review will present the results reported in the original studies, however authors may be contacted  
30 for relevant primary source of data. As indicated previously, we will calculate data, where possible,  
31 using the original information from the study such as for IPV or women's health, safety and  
32 wellbeing. In addition, quantitative data from figures can be utilised if there is sufficient information  
33 reported/explained in the study.  
34

35 Additional data analysis can be made in order to assess the comparisons between studies, if possible.  
36 Qualitative synthesis of relevant process evaluations of included studies will be reported descriptively,  
37 restricting to qualitative components from eligible quantitative studies.  
38

39 For duplicate studies that have used the same study population or data, the most recent or relevant  
40 publication will be utilised for studies published in more than one journal, if possible the data will be  
41 linked together.  
42

43 In summary, data analysis will be performed according to the data availability of eligible studies, and  
44 statistical expertise will be consulted as needed. The software STATA (version 15) will be utilised for  
45 all the quantitative analyses. We will relatively give more weight in the synthesis to results from  
46 studies with stronger design.  
47

### 48 **Cochrane's recommendations for reviews in public health**

49  
50 This review will follow some of the Cochrane guidelines for reviews conducted in public health and  
51 health promotion scenarios. One of the key points is sustainability, referred by The Cochrane  
52 Collaboration Group<sup>33</sup> as an important aspect to be included in systematic reviews in public health  
53 contexts, because it is likely to increase the concern of policymakers, practitioners and funders. When  
54 sustainability was measured in eligible studies we will look for additional explanations about which  
55 outcomes were measured over what period. However, if it was not measured, but authors explore the  
56  
57  
58  
59

potential for sustainability it will also be summarised.

Another Cochrane<sup>33</sup> recommendation for systematic reviews in public health is the consideration of applicability and transferability. Applicability refers to how the findings of a given study or review can be translated into specific population or settings. Transferability is also referred as the potential for this translation occurs. If the reviewed studies mention these aspects, they will also be included in the analysis.

### **Economic evidence**

Cochrane<sup>33</sup> recommends the review of economic evidence, because it provides additional information for decision makers, considering not only if a strategy or intervention works, but also whether its adoption will improve the use of resources. The economic issues are not the main objective of this review, therefore, it will not be an inclusion or exclusion criteria, but will compose an additional source of information when mentioned in the studies. We believe this information will be particularly important for LMIC and summary will be presented when described in eligible studies.

### **PRESENTING AND REPORTING THE RESULTS**

The process of selection of eligible studies for the systematic review will follow the flow diagram according to guidelines of the PRISMA-P (appendix 1). The main steps of the review will include: the identification of studies, screening, evaluation according to inclusion/exclusion criteria and analysis of eligible studies. Results will be presented according to the outcomes: for survivors; for PHC workers; and for public health systems. Data will be summarized in tables depending on data from each study, but presenting first author's name, country, year of publication, study design, aims and main outcomes.

### **POTENTIAL AMENDMENTS**

This protocol is designed to guide with rigour all the steps of this systematic review. Amendments are not expected, but if necessary, just in case of any unexpected event, they will be reported in a detailed and consistent way, followed by appropriate justification. The same will be applied to any differences between the protocol and the review. In case of differences, they will be fully described in a specific section of the final review, providing rationale for them.

### **CONCLUSION AND IMPLICATIONS**

Intimate partner violence is one of the main public health problems for women's health, safety and wellbeing. It requires effective and sustainable actions to reduce harm and life-threatening, targeting comprehensive interventions, particularly in primary health care settings in low-and-middle income contexts. This challenge is more severe in developing countries and exchanging effective interventions can be a coordinated way to foster debate and action. This review will systematise the knowledge previously produced, identifying research gaps and opportunities on interventions conducted in LMIC.

IPV is a potentially preventable issue, but its complexity requires the articulation of different sectors (including health systems, education, justice, among others), in different levels (highlighting the key potential role of the primary care level, but connecting to other levels), with collaboration of different actors (such as health professionals, managers, police, etc.) and with different targets (survivors, perpetrators, families, communities, etc.).

Facing this complex scenario, it is significant to recognize the limitations of this review, such as the types of studies included, that do not include all possible methodological approaches conducted in LMIC. Another limitation is the possible diversity of interventions, that can be challenging to be compared and systematised. It could be possible that other relevant studies will be excluded, since this

1  
2  
3 review includes only studies published in English, Portuguese and Spanish. Another potential  
4 limitation may be that funding for rigorous studies of IPV interventions has only been fostered in the  
5 past few years, potentially limiting the ability to identify relevant studies in the review time period. In  
6 a systematic review, this limitation may also become a study finding, since a dearth of evidence is, in  
7 itself, useful to inform the field.

8  
9 It is important to mention that the findings of this systematic review will be cautiously interpreted and  
10 the conclusions will be presented with parsimony, considering such limitations. This review will only  
11 focus in a 'tip of the iceberg', but it can raise questions for future studies with focus, for example, in  
12 other levels of care or in other sectors rather than the public health or even including other  
13 methodological approaches, such as qualitative studies, which have been extensively reported in  
14 LMIC.  
15

## 16 17 **ETHICS AND DISSEMINATION**

### 18 19 **Ethical issues**

20  
21 This systematic review is based on studies previously published and does not include collection of  
22 new primary data. Consequently, the host university has stated that is not necessary to obtain ethical  
23 clearance.  
24

### 25 26 **Publication Plan**

27  
28 This review will be publicized in conferences (preliminary results) and the final article will be  
29 published in a peer-reviewed journal. We intend to publish both the protocol and the systematic  
30 review in open access journals, aiming to be accessible to investigators currently engaged in  
31 interventions in low-and-middle-income countries. This review affords a voice to researchers in the  
32 field of IPV who would otherwise go unheard, and provide greater insights into the range of possible  
33 interventions for nations facing comparable issues. It is expected that the final publication can support  
34 public systems and policies worldwide.  
35

### 36 37 **Author's contributions**

38  
39 MS conceived the review. SH, BQ, DO and AT assisted on the design of the study protocol. MS and  
40 SH drafted the protocol paper and all authors edited the subsequent versions. AT and KH critically  
41 revised the methodology. All authors have reviewed and approved the final version of the text.  
42

43  
44 **Funding:** This work was supported by the Brazilian CAPES Foundation which funded a scholarship  
45 for postdoctoral studies of the first author [Process number 88881.119273/2016-01]. The funder had  
46 no role on this protocol development.  
47

48  
49 **Competing interests:** none  
50

## 51 52 **REFERENCES**

- 53  
54 1. WHO. Global and regional estimates of violence against women: prevalence and health effects of  
55 intimate partner violence and non-partner sexual violence. Geneva: World Health  
56 Organization Department of Reproductive Health and Research, London School of Hygiene  
57 and Tropical Medicine, South African Medical Research Council., 2013.  
58  
59



- 1
  - 2
  - 3
  - 4
  - 5
  - 6
  - 7
  - 8
  - 9
  - 10
  - 11
  - 12
  - 13
  - 14
  - 15
  - 16
  - 17
  - 18
  - 19
  - 20
  - 21
  - 22
  - 23
  - 24
  - 25
  - 26
  - 27
  - 28
  - 29
  - 30
  - 31
  - 32
  - 33
  - 34
  - 35
  - 36
  - 37
  - 38
  - 39
  - 40
  - 41
  - 42
  - 43
  - 44
  - 45
  - 46
  - 47
  - 48
  - 49
  - 50
  - 51
  - 52
  - 53
  - 54
  - 55
  - 56
  - 57
  - 58
  - 59
  - 60
2. Krug EG, Mercy JA, Dahlberg LL, et al. The world report on violence and health. *Lancet* 2002;360(9339):1083-8. doi: 10.1016/S0140-6736(02)11133-0
3. Garcia-Moreno C, Jansen HA, Ellsberg M, et al. Prevalence of intimate partner violence: findings from the WHO multi-country study on women's health and domestic violence. *Lancet* 2006;368(9543):1260-9. doi: 10.1016/S0140-6736(06)69523-8
4. Campbell JC. Health consequences of intimate partner violence. *Lancet* 2002;359(9314):1331-6. doi: 10.1016/S0140-6736(02)08336-8
5. Coker AL, Davis KE, Arias I, et al. Physical and mental health effects of intimate partner violence for men and women. *Am J Prev Med* 2002;23(4):260-8.
6. Dutton MA, Green BL, Kaltman SI, et al. Intimate partner violence, PTSD, and adverse health outcomes. *J Interpers Violence* 2006;21(7):955-68. doi: 10.1177/0886260506289178
7. Sarkar NN. The impact of intimate partner violence on women's reproductive health and pregnancy outcome. *J Obstet Gynaecol* 2008;28(3):266-71. doi: 10.1080/01443610802042415
8. World Bank Country and Lending Groups. Washington: World Bank, 2017.
9. UN. Transforming our world: the 2030 agenda for sustainable development. New York: United Nations, 2015:31.
10. Organization WH. Global plan of action to strengthen the role of the health system within a national multisectoral response to address interpersonal violence, in particular against women and girls, and against children. In: research Dfrha, ed. Geneva: WHO, 2016:76.
11. Signorelli MC, Taft A, Pereira PP. Intimate partner violence against women and healthcare in Australia: charting the scene. *Cien Saude Colet* 2012;17(4):1037-48.
12. Carvalho G. A saúde pública no Brasil. *Estudos Avançados* 2013;27(78):20. doi: <http://dx.doi.org/10.1590/S0103-40142013000200002>
13. Aboal-Viñas JL. Salud pública y sistema sanitario. *Gaceta Sanitaria* 2010;4(Supplement 1):7. doi: <https://doi.org/10.1016/j.gaceta.2010.08.003>
14. Naidoo S. The South African national health insurance: a revolution in health-care delivery! *J Public Health (Oxf)* 2012;34(1):149-50. doi: 10.1093/pubmed/fds008
15. García-Moreno C, Hegarty K, d'Oliveira AF, et al. The health-systems response to violence against women. *Lancet* 2015;385(9977):1567-79. doi: 10.1016/S0140-6736(14)61837-7 [published Online First: 2014/11/21]
16. Keleher H. Why primary health care offers a more comprehensive approach to tackling health inequities than primary care. *Australian Journal of Primary Health* 2001;7(2):5.
17. Care ICoPH. Declaration of Alma-Ata. *WHO Chron* 1978;32(11):428-30.
18. (APHCRI) APHCRI. What is primary health care? In: (APHCRI) APHCRI, ed. Canberra: Australian Primary Health Care Research Institute (APHCRI), 2009.
19. Abramsky T, Devries K, Kiss L, et al. Findings from the SASA! Study: a cluster randomized controlled trial to assess the impact of a community mobilization intervention to prevent violence against women and reduce HIV risk in Kampala, Uganda. *BMC Med* 2014;12(1):122. doi: 10.1186/s12916-014-0122-5
20. Colombini M, Mayhew S, Watts C. Health-sector responses to intimate partner violence in low- and middle-income settings: a review of current models, challenges and opportunities. *Bull World Health Organ* 2008;86(8):635-42.
21. Bacchus LJ, Colombini M, Contreras Urbina M, et al. Exploring opportunities for coordinated responses to intimate partner violence and child maltreatment in low and middle income countries: a scoping review. *Psychol Health Med* 2017;22(sup1):135-65. doi: 10.1080/13548506.2016.1274410 [published Online First: 2017/02/02]
22. Bair-Merritt MH, Lewis-O'Connor A, Goel S, et al. Primary care-based interventions for intimate partner violence: a systematic review. *Am J Prev Med* 2014;46(2):188-94. doi: 10.1016/j.amepre.2013.10.001
23. Bourey C, Williams W, Bernstein EE, et al. Systematic review of structural interventions for intimate partner violence in low- and middle-income countries: organizing evidence for prevention. *BMC Public Health* 2015;15:1165. doi: 10.1186/s12889-015-2460-4 [published Online First: 2015/11/23]
24. Hegarty K, Tarzia L, Hooker L, et al. Interventions to support recovery after domestic and sexual violence in primary care. *Int Rev Psychiatry* 2016;28(5):519-32. doi:



- 10.1080/09540261.2016.1210103 [published Online First: 2016/08/09]
25. Taft AJ, Hooker L, Humphreys C, et al. Maternal and child health nurse screening and care for mothers experiencing domestic violence (MOVE): a cluster randomised trial. *BMC Med* 2015;13:150. doi: 10.1186/s12916-015-0375-7 [published Online First: 2015/06/25]
  26. Signorelli MC, Auad D, Pereira PP. Domestic violence against women and professional intervention in primary healthcare: an ethnographic study in Matinhos, Paraná State, Brazil. *Cad Saude Publica* 2013;29(6):1230-40.
  27. Starfield B, Shi L, Macinko J. Contribution of primary care to health systems and health. *Milbank Q* 2005;83(3):457-502. doi: 10.1111/j.1468-0009.2005.00409.x
  28. Kruk ME, Porignon D, Rockers PC, et al. The contribution of primary care to health and health systems in low- and middle-income countries: a critical review of major primary care initiatives. *Soc Sci Med* 2010;70(6):904-11. doi: 10.1016/j.socscimed.2009.11.025 [published Online First: 2010/01/19]
  29. Chan M. Ten years in public health, 2007–2017. In: Organization WH, ed. Geneva: World Health Organization, 2017:152.
  30. Moher D, Shamseer L, Clarke M, et al. Preferred reporting items for systematic review and meta-analysis protocols (PRISMA-P) 2015 statement. *Syst Rev* 2015;4:1. doi: 10.1186/2046-4053-4-1 [published Online First: 2015/01/01]
  31. Shamseer L, Moher D, Clarke M, et al. Preferred reporting items for systematic review and meta-analysis protocols (PRISMA-P) 2015: elaboration and explanation. *BMJ* 2015;349:g7647. [published Online First: 2015/01/02]
  32. Moher D, Liberati A, Tetzlaff J, et al. Preferred reporting items for systematic reviews and meta-analyses: the PRISMA statement. *J Clin Epidemiol* 2009;62(10):1006-12. doi: 10.1016/j.jclinepi.2009.06.005 [published Online First: 2009/07/23]
  33. Higgins J, Green S, editors. *Cochrane Handbook for Systematic Reviews of Interventions*. West Sussex: The Cochrane Collaboration and John Wiley & Sons, 2008.
  34. Blankenship KM, Friedman SR, Dworkin S, et al. Structural interventions: concepts, challenges and opportunities for research. *J Urban Health* 2006;83(1):59-72. doi: 10.1007/s11524-005-9007-4
  35. WHO Guidelines on Hand Hygiene in Health Care: First Global Patient Safety Challenge Clean Care Is Safer Care. Appendix 1 Definitions of health-care settings and other related terms. Geneva: World Health Organization, 2009.
  36. Hegarty K, Fracgp, Bush R, et al. The composite abuse scale: further development and assessment of reliability and validity of a multidimensional partner abuse measure in clinical settings. *Violence Vict* 2005;20(5):529-47.
  37. Campbell DW, Campbell J, King C, et al. The reliability and factor structure of the index of spouse abuse with African-American women. *Violence Vict* 1994;9(3):259-74.
  38. Goldberg DP, Hillier VF. A scaled version of the General Health Questionnaire. *Psychol Med* 1979;9(1):139-45.
  39. Eaton W, Smith C, Ybarra M, et al. Center for Epidemiologic Studies Depression Scale: review and revision (CESD and CESD-R). In: Maruish M, ed. *The Use of Psychological Testing for Treatment Planning and Outcomes Assessment*. 3 ed. Mahwah, NJ: Lawrence Erlbaum Associates, Inc 2004.
  40. Lang AJ, Stein MB. An abbreviated PTSD checklist for use as a screening instrument in primary care. *Behav Res Ther* 2005;43(5):585-94. doi: 10.1016/j.brat.2004.04.005
  41. Ware JE, Sherbourne CD. The MOS 36-item short-form health survey (SF-36). I. Conceptual framework and item selection. *Med Care* 1992;30(6):473-83.
  42. Campbell JC. Nursing assessment for risk of homicide with battered women. *ANS Adv Nurs Sci* 1986;8(4):36-51.
  43. Landgraf J, Abetz L, Ware J. *The Child Health Questionnaire (CHQ) user's manual*. 1st ed. ed. Boston: TheHealth Institute, New England Medical Centre, 1996.
  44. Ayala Quintanilla BP, Taft A, McDonald S, et al. Social determinants and maternal exposure to intimate partner violence of obstetric patients with severe maternal morbidity in the intensive care unit: a systematic review protocol. *BMJ Open* 2016;6(11):e013270. doi:

- 1  
2  
3 10.1136/bmjopen-2016-013270 [published Online First: 2016/11/28]  
4 45. Schünemann HJ, Schünemann AH, Oxman AD, et al. Grading quality of evidence and strength of  
5 recommendations for diagnostic tests and strategies. *BMJ* 2008;336(7653):1106-10. doi:  
6 10.1136/bmj.39500.677199.AE  
7 46. Pandis N, Fedorowicz Z. The international EQUATOR network: enhancing the quality and  
8 transparency of health care research. *J Appl Oral Sci* 2011;19(5)  
9 47. Higgins JP, Altman DG, Gøtzsche PC, et al. The Cochrane Collaboration's tool for assessing risk  
10 of bias in randomised trials. *BMJ* 2011;343:d5928. [published Online First: 2011/10/18]  
11 48. Slim K, Nini E, Forestier D, et al. Methodological index for non-randomized studies (minors):  
12 development and validation of a new instrument. *ANZ J Surg* 2003;73(9):712-6.  
13  
14  
15  
16  
17  
18  
19  
20  
21  
22  
23  
24  
25  
26  
27  
28  
29  
30  
31  
32  
33  
34  
35  
36  
37  
38  
39  
40  
41  
42  
43  
44  
45  
46  
47  
48  
49  
50  
51  
52  
53  
54  
55  
56  
57  
58  
59  
60

**Appendix 1 - PRISMA-P (Preferred Reporting Items for Systematic review and Meta-Analysis Protocols) 2015 checklist: recommended items to address in a systematic review protocol\***

| Section and topic                 | Item No | Checklist item                                                                                                                                                                                                                | Page number                                       |
|-----------------------------------|---------|-------------------------------------------------------------------------------------------------------------------------------------------------------------------------------------------------------------------------------|---------------------------------------------------|
| <b>ADMINISTRATIVE INFORMATION</b> |         |                                                                                                                                                                                                                               |                                                   |
| Title:                            |         |                                                                                                                                                                                                                               |                                                   |
| Identification                    | 1a      | Identify the report as a protocol of a systematic review                                                                                                                                                                      | 1                                                 |
| Update                            | 1b      | If the protocol is for an update of a previous systematic review, identify as such                                                                                                                                            | Not an update                                     |
| Registration                      | 2       | If registered, provide the name of the registry (such as PROSPERO) and registration number                                                                                                                                    | <del>PROSPERO</del><br><del>CRD420170692613</del> |
| Authors:                          |         |                                                                                                                                                                                                                               |                                                   |
| Contact                           | 3a      | Provide name, institutional affiliation, e-mail address of all protocol authors; provide physical mailing address of corresponding author                                                                                     | 1                                                 |
| Contributions                     | 3b      | Describe contributions of protocol authors and identify the guarantor of the review                                                                                                                                           | <del>120</del>                                    |
| Amendments                        | 4       | If the protocol represents an amendment of a previously completed or published protocol, identify as such and list changes; otherwise, state plan for documenting important protocol amendments                               | Not applicable                                    |
| Support:                          |         |                                                                                                                                                                                                                               |                                                   |
| Sources                           | 5a      | Indicate sources of financial or other support for the review                                                                                                                                                                 | <del>124</del>                                    |
| Sponsor                           | 5b      | Provide name for the review funder and/or sponsor                                                                                                                                                                             | <del>124</del>                                    |
| Role of sponsor or funder         | 5c      | Describe roles of funder(s), sponsor(s), and/or institution(s), if any, in developing the protocol                                                                                                                            | <del>124</del>                                    |
| <b>INTRODUCTION</b>               |         |                                                                                                                                                                                                                               |                                                   |
| Rationale                         | 6       | Describe the rationale for the review in the context of what is already known                                                                                                                                                 | <del>3, 4, 5</del>                                |
| Objectives                        | 7       | Provide an explicit statement of the question(s) the review will address with reference to participants, interventions, comparators, and outcomes (PICO)                                                                      | <del>45</del>                                     |
| <b>METHODS</b>                    |         |                                                                                                                                                                                                                               |                                                   |
| Eligibility criteria              | 8       | Specify the study characteristics (such as PICO, study design, setting, time frame) and report characteristics (such as years considered, language, publication status) to be used as criteria for eligibility for the review | <del>4, 5, 6, 7</del>                             |
| Information sources               | 9       | Describe all intended information sources (such as electronic databases, contact with study authors, trial registers or other grey literature sources) with planned dates of coverage                                         | <del>67</del>                                     |
| Search strategy                   | 10      | Present draft of search strategy to be used for at least one electronic database, including planned limits, such that it could be repeated                                                                                    | Detailed on Appendix 2                            |
| Study records:                    |         |                                                                                                                                                                                                                               |                                                   |
| Data management                   | 11a     | Describe the mechanism(s) that will be used to manage records and data throughout the review                                                                                                                                  | <del>78</del>                                     |

|                                    |     |                                                                                                                                                                                                                                                  |                           |
|------------------------------------|-----|--------------------------------------------------------------------------------------------------------------------------------------------------------------------------------------------------------------------------------------------------|---------------------------|
| Selection process                  | 11b | State the process that will be used for selecting studies (such as two independent reviewers) through each phase of the review (that is, screening, eligibility and inclusion in meta-analysis)                                                  | <u>78</u>                 |
| Data collection process            | 11c | Describe planned method of extracting data from reports (such as piloting forms, done independently, in duplicate), any processes for obtaining and confirming data from investigators                                                           | <u>89</u>                 |
| Data items                         | 12  | List and define all variables for which data will be sought (such as PICO items, funding sources), any pre-planned data assumptions and simplifications                                                                                          | <u>8,9</u> and Appendix 4 |
| Outcomes and prioritization        | 13  | List and define all outcomes for which data will be sought, including prioritization of main and additional outcomes, with rationale                                                                                                             | <u>5,6,7</u>              |
| Risk of bias in individual studies | 14  | Describe anticipated methods for assessing risk of bias of individual studies, including whether this will be done at the outcome or study level, or both; state how this information will be used in data synthesis                             | <u>7,8,9</u>              |
| Data synthesis                     | 15a | Describe criteria under which study data will be quantitatively synthesised                                                                                                                                                                      | <u>8,9,10</u>             |
|                                    | 15b | If data are appropriate for quantitative synthesis, describe planned summary measures, methods of handling data and methods of combining data from studies, including any planned exploration of consistency (such as $I^2$ , Kendall's $\tau$ ) | <u>8,9,10</u>             |
|                                    | 15c | Describe any proposed additional analyses (such as sensitivity or subgroup analyses, meta-regression)                                                                                                                                            | Not applicable            |
|                                    | 15d | If quantitative synthesis is not appropriate, describe the type of summary planned                                                                                                                                                               | <u>8,9,10</u>             |
| Meta-bias(es)                      | 16  | Specify any planned assessment of meta-bias(es) (such as publication bias across studies, selective reporting within studies)                                                                                                                    | Not applicable            |
| Confidence in cumulative evidence  | 17  | Describe how the strength of the body of evidence will be assessed (such as GRADE)                                                                                                                                                               | <u>8,9</u>                |

**\* It is strongly recommended that this checklist be read in conjunction with the PRISMA-P Explanation and Elaboration (cite when available) for important clarification on the items. Amendments to a review protocol should be tracked and dated. The copyright for PRISMA-P (including checklist) is held by the PRISMA-P Group and is distributed under a Creative Commons Attribution Licence 4.0.**

*From: Shamseer L, Moher D, Clarke M, Ghersi D, Liberati A, Petticrew M, Shekelle P, Stewart L, PRISMA-P Group. Preferred reporting items for systematic review and meta-analysis protocols (PRISMA-P) 2015: elaboration and explanation. BMJ. 2015 Jan 2;349(jan02 1):g7647.*

## Appendix 2 - General Search Strategy

1. ('primary health care\*' or 'primary care\*' or 'primary health\*' or 'primary health care interven\*' or 'health\* manag\*' or 'care manag\*' or 'primary health interven\*' or 'prevent\* program\*' or 'prevent\* interven\*' or 'early interven\*' or 'primary health\*' or 'strateg\*' or 'health promot\*' or 'comprehensive health\*' or 'community health\*' or 'famil\* health\*' or 'public health\*' or 'health\* system\*' or 'health\* worker\*' or 'health\* profession\*' or 'health\* polic\*' or 'antenatal car\*' or 'antenatal clinic\*' or 'basic health\*').mp. [mp=title, abstract, original title, name of substance word, subject heading word, keyword heading word, protocol supplementary concept word, rare disease supplementary concept word, unique identifier, synonyms]

2. Primary Health Care/ or Public Health/ or Health Policy/ or Health Promotion/ or Health Personnel/ or Developing Countries/

3. 1 {or/and} 2

4. ('partner violen\*' or 'partner abus\*' or 'spouse violen\*' or 'spouse abus\*' or 'partner harm\*' or 'violen\* against wom\*' or 'battered women' or 'dating violen\*' or 'dating abus\*' or 'gender based violen\*' or 'gender based abus\*').mp. [mp=title, abstract, original title, name of substance word, subject heading word, keyword heading word, protocol supplementary concept word, rare disease supplementary concept word, unique identifier, synonyms]

5. Intimate Partner Violence/ or Battered Women/

6. 4 {or/and} 5

7. ('low\* middle\* incom\* countr\*' OR 'low\* incom\* countr\*' OR 'middle\* incom\* countr\*' OR 'underdevelop\* countr\*' OR 'developing countr\*' OR 'third\* world countr\*' OR 'low\* middle\* income\* nation\*' OR 'third\*world\* nation\*' OR 'underdevelop\* nation\*' OR 'less\* developed nation\*' OR 'low\* income nation\*' OR 'developing nation\*' OR 'least\* developed countr\*' OR 'emerg\* countr\*' OR 'less-developed countr\*' OR 'developing world\*' OR 'undeveloped world\*' OR 'emerg\* world' OR 'Latin\* America\*' OR 'Central\* America\*' OR 'Caribbean' OR 'South\* America\*' OR 'Africa\*' OR 'Asia\*' OR 'Pacific' OR 'Middle\* East\*' OR 'Latin\* America\*' OR 'Central America\*' OR 'South America\*' OR 'Africa\*' OR 'Asia\*' OR 'Pacific' OR 'Middle East\*' OR 'Afghanistan' OR 'Albania' OR 'Algeria' OR 'American Samoa' OR 'Angola' OR 'Argentina' OR 'Armenia' OR 'Azerbaijan' OR 'Bangladesh' OR 'Belarus' OR 'Belize' OR 'Benin' OR 'Bhutan' OR 'Bolivia' OR 'Bosnia\*Herzegovina' OR 'Botswana' OR 'Brazil' OR 'Bulgaria' OR 'Burkina Faso' OR 'Burundi' OR 'Cabo Verde' OR 'Cambodia' OR 'Cameroon' OR 'Central African Republic' OR 'Chad' OR 'China' OR 'Colombia' OR 'Comoros' OR 'Congo, Dem\* Rep\*' OR 'Congo, Rep\*' OR 'Costa Rica' OR 'Cote d'Ivoire' OR 'Cuba' OR 'Djibouti' OR 'Dominica' OR 'Dominican Republic' OR 'Ecuador' OR 'Egypt' OR 'El Salvador' OR 'Equatorial Guinea' OR 'Eritrea' OR 'Ethiopia' OR 'Fiji' OR 'Gabon' OR 'Gambia' OR 'Georgia' OR 'Ghana' OR 'Grenada' OR 'Guatemala' OR 'Guinea' OR 'Guinea-Bissau' OR 'Guyana' OR 'Haiti' OR 'Honduras' OR 'India' OR 'Indonesia' OR 'Iran' OR 'Iraq' OR 'Jamaica' OR 'Jordan' OR 'Kazakhstan' OR 'Kenya' OR 'Kiribati' OR 'Korea, Dem\* People's Rep\*' OR 'North Korea' OR 'Kosovo' OR 'Kyrgyz' OR 'Lao' OR 'Lebanon' OR 'Lesotho' OR 'Liberia' OR 'Libya' OR 'Macedonia' OR 'Madagascar' OR 'Malawi' OR 'Malaysia' OR 'Maldives' OR 'Mali' OR 'Marshall Islands' OR 'Mauritania' OR 'Mauritius' OR Mexico' OR 'Micronesia' OR 'Moldova' OR 'Mongolia' OR 'Montenegro' OR 'Morocco' OR 'Mozambique' OR 'Myanmar' OR 'Namibia' OR 'Nepal' OR 'Nicaragua' OR Niger' OR 'Nigeria' OR 'Pakistan' OR 'Palau' OR 'Palestine' OR 'Panama' OR 'Papua New Guinea' OR 'Paraguay' OR 'Peru' OR 'Philippines' OR 'Romania' OR 'Russian Federation' OR 'Russia' OR 'Rwanda' OR 'Samoa' OR 'Sao Tome and Principe' OR 'Senegal' OR 'Serbia' OR 'Sierra Leone' OR 'Solomon Islands' OR 'Somalia' OR 'South Africa' OR 'South Sudan' OR 'Sri Lanka' OR 'St. Lucia' OR 'St. Vincent and the Grenadines' OR 'Sudan' OR 'Suriname' OR 'Swaziland' OR 'Syrian Arab Republic' OR 'Syria' OR 'Tajikistan' OR 'Tanzania' OR 'Thailand' OR 'Timor-Leste' OR 'East Timor' OR 'Togo' OR 'Tonga' OR 'Tunisia' OR 'Turkey' OR 'Turkmenistan' OR 'Tuvalu' OR 'Uganda' OR 'Ukraine' OR 'Uzbekistan' OR 'Vanuatu' OR 'Venezuela' OR 'Vietnam' OR 'West Bank\* Gaza' OR 'Yemen' OR 'Zambia' OR 'Zimbabwe').mp. [mp=title, abstract, original title, name of substance word, subject heading word, keyword heading word, protocol supplementary concept word,

rare disease supplementary concept word, unique identifier, synonyms]

8. Developing countries/ OR Argentina/ OR Bolivia/ OR Brazil/ OR Colombia/ OR Ecuador/ OR Guyana/ OR Paraguay/ OR Peru/ OR Suriname/ OR Venezuela/ OR exp Latin America/ OR exp Caribbean Region/ OR exp Central America/ OR exp Africa/ OR esp Central Asia/ OR exp Northern Asia/ OR Cambodia/ OR Timor-Leste/ OR Indonesia/ OR Laos/ OR Malaysia/ OR Myanmar/ OR Philippines/ OR Thailand/ OR Vietnan/ OR Bangladesh/ OR Buthan/ OR exp India/ OR Nepal/ OR Pakistan/ OR Sri Lanka/ OR Afghanistan/ OR Iran/ OR Iraq/ OR Jordan/ OR Lebanon/ OR Syria/ OR Turkey/ OR Yemen/ OR exp China/ OR Mongolia/ OR Democratic People’s Republic of Korea/ OR Balkan Peninsula/ OR Albania/ OR Bosnia and Herzegovina/ OR Bulgaria/ OR Kosovo/ OR Macedonia/ OR Moldova/ OR Montenegro/ OR exp Republic of Belarus OR Romania/ OR exp Russia/ OR Serbia/ OR Ukraine/ OR exp Transcaucasia/ OR Comoros/ OR Madagascar/ OR Mauritius/ OR Indonesia/ OR Fiji/ OR Papua New Guinea/ OR Vanuatu/ OR Palau/ OR exp Samoa/ OR Tonga/ OR Cuba/ OR Dominica/ OR Dominican Republic/ OR Grenada/ OR Haiti/ OR Jamaica/ OR St. Lucia/ OR St. Vincent and the Grenadines/

9. 7 {or/and} 8

10. 3 and 6 and 9

11. Limit 10 to (full text and yr="2007 -Current" and (English or Portuguese or Spanish))

| Search | Free text words - Portuguese (MeSH terms only available in English)                                                                                                                                                                                                                                                                                                                                                                                                                                                                                                                                                                                                                                                                                                                                                                                                                                                                                                                                                                                                                                                                                                                                                                                          |
|--------|--------------------------------------------------------------------------------------------------------------------------------------------------------------------------------------------------------------------------------------------------------------------------------------------------------------------------------------------------------------------------------------------------------------------------------------------------------------------------------------------------------------------------------------------------------------------------------------------------------------------------------------------------------------------------------------------------------------------------------------------------------------------------------------------------------------------------------------------------------------------------------------------------------------------------------------------------------------------------------------------------------------------------------------------------------------------------------------------------------------------------------------------------------------------------------------------------------------------------------------------------------------|
| #1     | <p>“atenção primár* saúde” OR “cuidado* primár*” OR “saúde primár*” OR “gestão* saúde” OR “manej* saúde” OR “interven* saúde* primár*” OR “program* preven*” OR “interven* preven*” OR “interven* precoce*” OR “estratégi* saúde primár*” OR “promoç* d* saúde” OR “saúde integral*” OR “saúde* comuni*” OR “saúde* família*” OR “saúde públic*” OR “sistema* saúde*” OR “trabalhador* saúde” OR “agente* saúde” OR “profissiona* saúde” OR “polític* saúde” OR “cuidado* pré-nata*” OR “ambulator* pré-nata*” OR “saúde básic*” OR “atenç* básic*” OR “centro* saúde” OR “posto* saúde” OR “unidade* saúde”</p>                                                                                                                                                                                                                                                                                                                                                                                                                                                                                                                                                                                                                                             |
| #2     | <p>“violen* parceir*” OR “abus* parceir*” OR “violen* conjug*” OR “abus* conjug*” OR “agress* parceir*” OR “violen* contra* mulher*” OR “mulher* espancada*” OR “violen* namor*” OR “abus* namor*” OR “violen* gênero” OR “abus* gênero”</p>                                                                                                                                                                                                                                                                                                                                                                                                                                                                                                                                                                                                                                                                                                                                                                                                                                                                                                                                                                                                                 |
| #3     | <p>“país* renda baixa* média*” OR “país* baixa* média* renda*” OR “país* baixa* renda*” OR “país* renda* média” OR “país* subdesenvolv*” OR “país* em desenvolvimento” OR “país* terceiro mundo” OR “naç* renda baixa* média*” OR “naç* terceiro mundo” OR “naç* subdesenvolv*” OR “naç* menos desenvolvid*” OR “naç* baix* desenvolv*” OR “naç* em desenvolvimento” OR “país* menos desenvolvid*” OR “país* emergente*” OR “país* pobre*” OR “naç* pobre*” OR “mundo em desenvolvimento” OR “mundo subdesenvolvido” OR “mundo emergente” OR “naç* emergente* OR “América Latin*” OR "América Central" OR "América do Sul" OR “Carib*” OR “África*” OR “Ásia*” OR “Pacífico*” OR “Oceania” OR "Oriente Médio" OR "Afeganistão" OR "Albânia" OR "Argélia" OR "Samoa Americana" OR "Angola" OR "Argentina" OR "Armênia" OR "Azerbaijão" OR "Bangladesh" OR "Bielorrússia" OR "Belize" OR "Benin" OR "Butão" OR "Bolívia" OR "Bósnia* Herzegovina" OR "Botswana" OR "Brasil" OR "Bulgária" OR “Burkina Faso” OR "Burundi" OR "Cabo Verde" OR "Camboja" OR "Camarões" OR "República Centro-Africana" OR "Chade" OR "China" OR "Colômbia" OR "Comores" OR "Congo, Dem* Rep*” OR "Congo, Rep*” OR "Costa Rica" OR "Costa do Marfim" OR "Cuba" OR "Djibouti” OR</p> |



|                                                                                                                                                                                                                                                                                                                                                                                                                                                                                                                                                                                                                                                                                                                                                                                                                                                                                                                                                                                                                                                                                                                                                                                                                                                                                                                                                                                                                                                                                                                                                                                                                                                                         |
|-------------------------------------------------------------------------------------------------------------------------------------------------------------------------------------------------------------------------------------------------------------------------------------------------------------------------------------------------------------------------------------------------------------------------------------------------------------------------------------------------------------------------------------------------------------------------------------------------------------------------------------------------------------------------------------------------------------------------------------------------------------------------------------------------------------------------------------------------------------------------------------------------------------------------------------------------------------------------------------------------------------------------------------------------------------------------------------------------------------------------------------------------------------------------------------------------------------------------------------------------------------------------------------------------------------------------------------------------------------------------------------------------------------------------------------------------------------------------------------------------------------------------------------------------------------------------------------------------------------------------------------------------------------------------|
| <p>"Dominica" OR "República Dominicana" OR "Equador" OR "Egito" OR "El Salvador" OR "Guiné Equatorial" OR "Eritreia" OR "Etiópia" OR "Fiji" OR "Gabão" OR "Gâmbia" OR "Geórgia" OR "Gana" OR "Granada" OR "Guatemala" OR "Guiné" OR "Guiné-Bissau" OR "Guiana" OR "Haiti" OR "Honduras" OR "Índia" OR "Indonésia" OR "Irã" OR "Iraque" OR "Jamaica" OR "Jordânia" OR "Cazaquistão" OR "Quênia" OR "Kiribati" OR "Coréia, Rep* Dem*" OR "Coréia do Norte" OR "Kosovo" OR "Quirguistão" OR "Laos" OR "Líbano" OR "Lesoto" OR "Libéria" OR "Líbia" OR "Macedônia" OR "Madagascar" OR "Malawi" OR "Malásia" OR "Maldivas" OR "Mali" OR "Ilhas Marshall" OR "Mauritânia" OR "Mauríci*" OR "México" OR "Micronésia" OR "Moldávia" OR "Mongólia" OR "Montenegro" OR "Marrocos" OR "Moçambique" OR "Mianmar" OR "Namíbia" OR "Nepal" OR "Nicarágua" OR "Níger" OR "Nigéria" OR "Paquistão" OR "Palau" OR "Panamá" OR "Papua Nova Guiné" OR "Paraguai" OR "Peru" OR "Filipinas" OR "Romênia" OR "Federação Russa" OR "Rússia" OR "Ruanda" OR "Samoa" OR "São Tomé e Príncipe" OR "Senegal" OR "Sérvia" OR "Serra Leoa" OR "Ilhas Salomão" OR "Somália" OR "África do Sul" OR "Sudão do Sul" OR "Sri Lanka" OR "St. Lucia" OR "São. Vincente e Granadinas" OR "Sudão" OR "Suriname" OR "Suazilândia" OR "República Árabe da Síria" OR "Síria" OR "Tajiquistão" OR "Tanzânia" OR "Tailândia" OR "Timor-Leste" OR "Timor* Leste" OR "Togo" OR "Tonga" OR "Tunísia" OR "Turquia" OR "Turcomenistão" OR "Tuvalu" OR "Uganda" OR "Ucrânia" OR "Uzbequistão" OR "Vanuatu" OR "Venezuela" OR "Vietn*" OR "Cisjordânia" OR "Gaza" OR "Palestina" OR "Iêmen" OR "Zâmbia" OR "Zimbábue"</p> |
|-------------------------------------------------------------------------------------------------------------------------------------------------------------------------------------------------------------------------------------------------------------------------------------------------------------------------------------------------------------------------------------------------------------------------------------------------------------------------------------------------------------------------------------------------------------------------------------------------------------------------------------------------------------------------------------------------------------------------------------------------------------------------------------------------------------------------------------------------------------------------------------------------------------------------------------------------------------------------------------------------------------------------------------------------------------------------------------------------------------------------------------------------------------------------------------------------------------------------------------------------------------------------------------------------------------------------------------------------------------------------------------------------------------------------------------------------------------------------------------------------------------------------------------------------------------------------------------------------------------------------------------------------------------------------|

| Search | Free text words - Spanish (MeSH terms only available in English)                                                                                                                                                                                                                                                                                                                                                                                                                                                                                                                                                                                                                                                                                                                                                                                                                                                                                                             |
|--------|------------------------------------------------------------------------------------------------------------------------------------------------------------------------------------------------------------------------------------------------------------------------------------------------------------------------------------------------------------------------------------------------------------------------------------------------------------------------------------------------------------------------------------------------------------------------------------------------------------------------------------------------------------------------------------------------------------------------------------------------------------------------------------------------------------------------------------------------------------------------------------------------------------------------------------------------------------------------------|
| #1     | <p>“atenci* primar* salud” OR “atenci* primar*” OR “cuidado* primar*” OR “salud primar*” OR “gestion* salud” OR “manej* salud” OR “interven* primar* salud*” OR “program* OR interven*” OR “interven* tempran*” OR “estrateg* salud primar*” OR “promoc* salud” OR “salud integral*” OR “salud* comuni*” OR “salud* famili*” OR “salud public*” OR “sistema* salud” OR “trabajad* salud” OR “agente* salud” OR “profession* salud” OR “politic* salud” OR “cuidado prenatal*” OR “clínica* prenatal*” OR “salud basic*” OR “atenci* basic*” OR “primer nivel de atención” OR “centro* de salud” OR “puesto* de salud” OR “posta* médica*”</p>                                                                                                                                                                                                                                                                                                                                |
| #2     | <p>“violen* pareja*” OR “abuso* pareja*” OR “violencia conyug*” OR “abuso conyug*” OR “daño* pareja*” OR “violen* contra la* mujer*” OR “abus* contra la* mujer*” OR “mujer* golpeada*” OR “mujer* maltratada*” OR “violen* contra la* enamora*” OR “abus* contra la* enamora*” OR “violencia de género” OR “abuso de género” OR “violencia de* compañer* íntim*” OR “mujer* violentada*”</p>                                                                                                                                                                                                                                                                                                                                                                                                                                                                                                                                                                                |
| #3     | <p>“país* con ingreso mediano* bajo*” OR “país* con ingreso bajo* OR “país* subdesarrollado*” OR “país* en desarrollo*” OR “país* tercer mundo” OR “nacion* con ingreso mediano* bajo*” OR “nacion* del tercer mundo” OR “nacion* subdesarrollada*” OR “nacion* menos desarroll*” OR “nacion* con bajo desarroll*” OR “nacion* en desarrollo” OR “país* menos desarroll*” OR “país* menos desarroll*” OR “país* emergente*” OR “nacion* emergente*” OR “mundo emergente” OR “mundo subdesarrollado” OR “país* en vías de desarrollo” OR “Caribe” OR “América Latina*” OR “América del Sur” OR “Sudamérica” “África*” OR “Asia*” OR “Pacífico” OR “Oriente Medio” OR “Afganistán” OR “Albania” OR “Argelia” OR “Angola” OR “Argentina” OR “Samoa Americana” OR “Armenia” OR “Azerbaiyán” OR “Bangladesh” OR “Bielorrusia” OR “Belice” OR “Benin” OR “Bolivia” OR “Bosnia* Herzegovina” OR “Botswana” OR “Brasil” OR “Bulgaria” OR “Burkina Faso” OR “Burundi” OR “Bhutan”</p> |

|                                                                                                                                                                                                                                                                                                                                                                                                                                                                                                                                                                                                                                                                                                                                                                                                                                                                                                                                                                                                                                                                                                                                                                                                                                                                                                                                                                                                                                                                                                                                                                                                                                                                                                                                                                                                                                                                                                                                                                                                                                                                                                                       |
|-----------------------------------------------------------------------------------------------------------------------------------------------------------------------------------------------------------------------------------------------------------------------------------------------------------------------------------------------------------------------------------------------------------------------------------------------------------------------------------------------------------------------------------------------------------------------------------------------------------------------------------------------------------------------------------------------------------------------------------------------------------------------------------------------------------------------------------------------------------------------------------------------------------------------------------------------------------------------------------------------------------------------------------------------------------------------------------------------------------------------------------------------------------------------------------------------------------------------------------------------------------------------------------------------------------------------------------------------------------------------------------------------------------------------------------------------------------------------------------------------------------------------------------------------------------------------------------------------------------------------------------------------------------------------------------------------------------------------------------------------------------------------------------------------------------------------------------------------------------------------------------------------------------------------------------------------------------------------------------------------------------------------------------------------------------------------------------------------------------------------|
| <p>           OR "Cabo Verde" OR "Camboya" OR "Camerún" OR "República Centroafricana"<br/>           OR "Chad" OR "China" OR "Costa Rica" OR "Costa de Marfil" OR "Cuba" OR<br/>           "Djibouti" OR "Dominica" OR "Costa Rica" OR "Colombia" OR "Comoras" OR "Congo,<br/>           Rep*" OR "República Dominicana" OR "Ecuador" OR "Egipto" OR "El Salvador" OR<br/>           "Guinea Ecuatorial" OR "Eritrea" OR "Etiopía" OR "Fiji" OR "Gabón" OR "Georgia"<br/>           OR "Gambia" OR "Ghana" OR "Grenada" OR "Guatemala" OR "Guinea" OR "Guinea-<br/>           Bissau" OR "Guyana" OR "Haití" OR "Honduras" OR "India" OR "Indonesia" OR "Iran"<br/>           OR "Irak" OR "Jamaica" OR "Jordania" OR "Kazajstán" OR "Kenia" OR "Kiribati" OR<br/>           "Corea, República Democrática" OR "Corea del Norte" OR "Kosovo" OR "Laos" OR<br/>           "Líbano" OR "Lesotho" OR "Liberia" OR "Libia" OR "Macedonia" OR "Madagascar"<br/>           OR "Malawi" OR "Malasia" OR "Maldivas" OR "Mali" OR "Islas Marshall" OR<br/>           "Mauritania" OR "Maurici*" OR "México" OR "Micronesia" OR "Moldavia" OR<br/>           "Mongolia" OR "Montenegro" OR "Marruecos" OR "Mozambique" OR "Myanmar" OR<br/>           "Namibia" OR "Nepal" OR "Nicaragua" OR "Níger" OR "Nigeria" OR "Pakistán" OR<br/>           "Palau" OR "Panamá" OR "Papúa Nueva Guinea" OR "Paraguay" OR "Perú" OR<br/>           "Filipinas" OR "Rumania" OR "Rusia" OR "Rwanda" OR "Samoa" OR "Santo Tomé y<br/>           Príncipe" OR "Senegal" OR "Serbia" OR "Sierra Leona" OR "Somalia" OR "Sudáfrica"<br/>           OR "Sudán del Sur" OR "Sri Lanka" OR "St. Lucia" OR "Siria" OR "Tayikistán" OR<br/>           "Tanzania" OR "Tailandia" OR "Timor Oriental" OR "República Democrática del<br/>           Congo" OR "Tonga" OR "Túnez" OR "Turquía" OR "Turkmenistán" OR "Tuvalu" OR<br/>           "Uganda" OR "Ucrania" OR "Uzbekistán" OR "Vanuatu" OR "Venezuela" OR<br/>           "Vietnam" OR "Cisjordania*" OR "Gaza" OR "Palestina" OR "Yemen" OR "Zambia"<br/>           OR "Zimbabwe"         </p> |
|-----------------------------------------------------------------------------------------------------------------------------------------------------------------------------------------------------------------------------------------------------------------------------------------------------------------------------------------------------------------------------------------------------------------------------------------------------------------------------------------------------------------------------------------------------------------------------------------------------------------------------------------------------------------------------------------------------------------------------------------------------------------------------------------------------------------------------------------------------------------------------------------------------------------------------------------------------------------------------------------------------------------------------------------------------------------------------------------------------------------------------------------------------------------------------------------------------------------------------------------------------------------------------------------------------------------------------------------------------------------------------------------------------------------------------------------------------------------------------------------------------------------------------------------------------------------------------------------------------------------------------------------------------------------------------------------------------------------------------------------------------------------------------------------------------------------------------------------------------------------------------------------------------------------------------------------------------------------------------------------------------------------------------------------------------------------------------------------------------------------------|

This search strategy can be adapted and modified according to each electronic database.

**Appendix 3 -PRISMA Flow Diagram: flow of information through different phases of a systematic review**

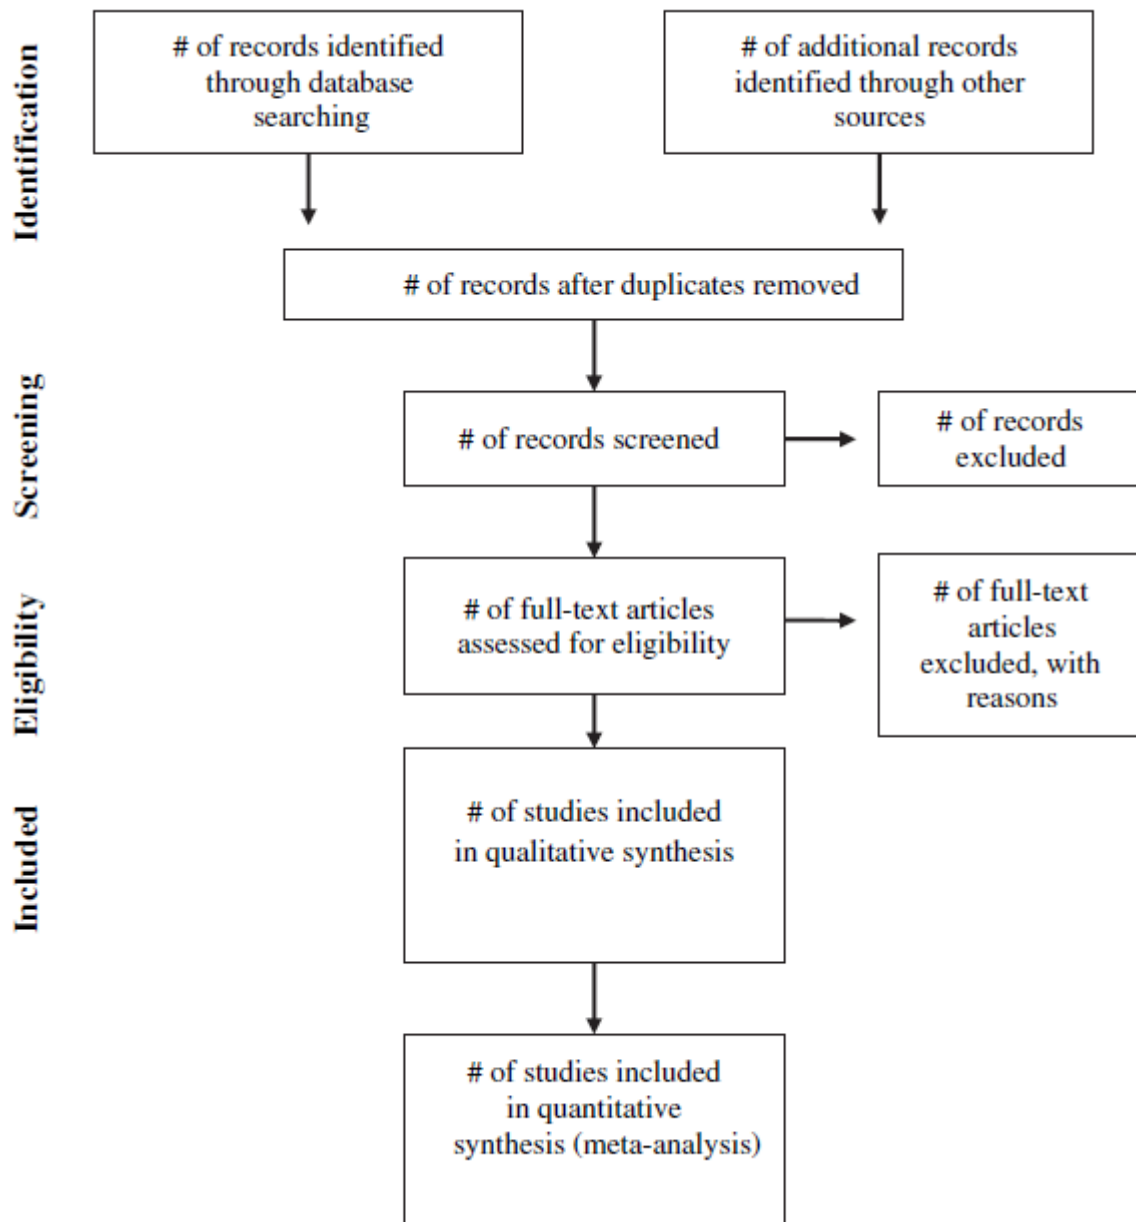

Source: Moher D, Liberati A, Tetzlaff J, et al. Preferred reporting items for systematic reviews and meta-analyses: the PRISMA statement. PLoS Med 2009;6:e1000097 doi:10.1371/journal.pmed.1000097 [published Online: 21 July 2009].

## Appendix 4 - Data Items

### 1. General Information and characteristics of the studies

- a. Author's name
- b. Journal
- c. Year of publication
- d. Country of the intervention
- e. Context (urban/rural)
- f. Type of service/setting
- g. Participants (e.g. workers, users - victims, family members, perpetrators)

### 2. Methodology

- a. Study design
- b. Type of intervention
- c. Sample/number of participants
- d. Year(s) when intervention was conducted
- e. Data collection
- f. Measures
- g. Analysis
- h. Ethics clearance

### 3. Impacts/ and outcomes of the intervention for survivors:

- a. IPV rates
- b. health (e.g. physical, mental)
- c. safety (e.g. safety plans)
- d. wellbeing (e.g. quality of life)
- e. children (e.g. children's health and wellbeing)
- f. Other Impacts/ and outcomes (if described)
- g. Barriers and facilitators for survivors (if investigated)

### 4. Impacts/ and outcomes of the intervention for PHC workers' practices:

- a. Types of workers (e.g. nurses, community health workers, receptionists)
- b. Worker's role in the intervention
- c. Measures of impacts and /outcomes concerned to workers
- d. Barriers and facilitators for workers (if described)

### 5. Role of the PHC services and public health systems to improve survivors' healthcare:

- a. Measures of impacts and /outcomes of the intervention for services/systems
- b. Impacts and /outcomes of the intervention for policies and organizational structure
- c. Articulation with other levels of care in the healthcare system (e.g. hospital, emergency, etc.)
- d. Articulation with other sectors beyond public health (e.g. police, justice, housing, etc.)
- e. Costs
- f. Sustainability
- g. Barriers and facilitators for services/systems (if described)

### 6. Other relevant information

# BMJ Open

## Voices from low-and-middle-income countries: a systematic review protocol of primary health care interventions within public health systems addressing intimate partner violence against women

|                                 |                                                                                                                                                                                                                                                                                                                                                                                                                                                                                                                                                                                               |
|---------------------------------|-----------------------------------------------------------------------------------------------------------------------------------------------------------------------------------------------------------------------------------------------------------------------------------------------------------------------------------------------------------------------------------------------------------------------------------------------------------------------------------------------------------------------------------------------------------------------------------------------|
| Journal:                        | <i>BMJ Open</i>                                                                                                                                                                                                                                                                                                                                                                                                                                                                                                                                                                               |
| Manuscript ID                   | bmjopen-2017-019266.R2                                                                                                                                                                                                                                                                                                                                                                                                                                                                                                                                                                        |
| Article Type:                   | Protocol                                                                                                                                                                                                                                                                                                                                                                                                                                                                                                                                                                                      |
| Date Submitted by the Author:   | 15-Feb-2018                                                                                                                                                                                                                                                                                                                                                                                                                                                                                                                                                                                   |
| Complete List of Authors:       | Signorelli, Marcos; Universidade Federal do Parana, Department of Collective Health<br>Hillel, Stav; La Trobe University - Melbourne Campus, Library de Oliveira, Daniel; Universidade Federal do Rio Grande do Sul, Department of Collective Health<br>Ayala Quintanilla, Beatriz; La Trobe University College of Science Health and Engineering, Judith Lumley Centre; Peruvian National Institute of Health, Lima<br>Hegarty, Kelsey; University of Melbourne, Dept of General Practice; The Royal Women's Hospital<br>Taft, Angela; La Trobe University, Mother and Child Health Research |
| <b>Primary Subject Heading</b>: | Public health                                                                                                                                                                                                                                                                                                                                                                                                                                                                                                                                                                                 |
| Secondary Subject Heading:      | Health services research, General practice / Family practice                                                                                                                                                                                                                                                                                                                                                                                                                                                                                                                                  |
| Keywords:                       | PUBLIC HEALTH, INTIMATE PARTNER VIOLENCE, LOW-AND-MIDDLE-INCOME COUNTRIES, PRIMARY CARE, SYSTEMATIC REVIEW                                                                                                                                                                                                                                                                                                                                                                                                                                                                                    |
|                                 |                                                                                                                                                                                                                                                                                                                                                                                                                                                                                                                                                                                               |

SCHOLARONE™  
Manuscripts

**Title:** Voices from low-and-middle-income countries: a systematic review protocol of primary health care interventions within public health systems addressing intimate partner violence against women

**Authors:**

1. Signorelli, MC.

Ph.D. in Public Health

Postdoctoral Fellow, La Trobe University

Lecturer, Federal University of Parana

Rua Jaguariaíva, 512. Matinhos/PR - Brazil

T:+55 41 3511 8326

E: [signorelli.marcos@gmail.com](mailto:signorelli.marcos@gmail.com)

2. Hillel, S.

Senior Learning Advisor (Library), La Trobe University

Plenty Road & Kingsbury Drive, Bundoora VIC 3086

T: 03 9479 6097

E: [s.hillel@latrobe.edu.au](mailto:s.hillel@latrobe.edu.au)

3. Oliveira, DC.

PhD in Health Sciences

Lecturer, Federal University of Rio Grande do Sul

Porto Alegre/RS, Brazil

T: +55 51 98344 5848

E: [daniel.canavese@gmail.com](mailto:daniel.canavese@gmail.com)

4. Ayala Quintanilla, BP.

Ph.D. candidate, Judith Lumley Centre, La Trobe University

Melbourne/VIC, Australia

T: 03 9479 8784

E: [17801497@students.latrobe.edu.au](mailto:17801497@students.latrobe.edu.au)

5. Hegarty K,

Ph.D. in Preventive Medicine

Professor of Family Violence Prevention, The Royal Women's Hospital, Melbourne

Professor, Department of General Practice, The University of Melbourne

Melbourne/VIC, Australia

E: [k.hegarty@unimelb.edu.au](mailto:k.hegarty@unimelb.edu.au)

6. Taft A.

Ph.D. in Public Health



1  
2  
3 Professor, Judith Lumley Centre, La Trobe University

4 Melbourne/VIC, Australia

5  
6 E: a.taft@latrobe.edu.au  
7

8  
9 Word count: 4850 (excluding title, abstract, strengths & limitations, references and appendixes)  
10  
11  
12  
13  
14  
15  
16  
17  
18  
19  
20  
21  
22  
23  
24  
25  
26  
27  
28  
29  
30  
31  
32  
33  
34  
35  
36  
37  
38  
39  
40  
41  
42  
43  
44  
45  
46  
47  
48  
49  
50  
51  
52  
53  
54  
55  
56  
57  
58  
59  
60

## ABSTRACT

**Introduction:** Intimate partner violence (IPV) considerably harms the health, safety, and wellbeing of women. In response, public health systems around the globe have been gradually implementing strategies. In particular, low- and middle-income countries (LMIC) have been developing innovative interventions in primary health care (PHC) addressing the problem. This paper describes a protocol for a systematic review of studies addressing the impacts and outcomes of PHC centre interventions addressing IPV against women from LMIC.

**Methods and analysis:** A systematic search for studies will be conducted in African Index Medicus, Africa Portal Digital Library, CINAHL, Embase, Index Medicus for the South-East Asia Region, IndMed, LILACS, Medecins Sans Frontieres, Medline, Minority Health and Health Equity Archive, ProQuest, PsychInfo, SciELO, and Social Policy and Practice. Studies will be in English, Spanish, and Portuguese, published between 2007 and 2017, addressing IPV against women from LMIC, whose data quantitatively report on the impacts and outcomes for survivors and/or workers and/or public health systems pre- and post-intervention. Two trilingual reviewers will independently screen for study eligibility and data extraction, and a librarian will cross check for compliance. Risk of bias and quality assessment of studies will be measured according to: (1) the Cochrane Collaboration's tool for assessing risk of bias for randomised controlled trials; and (2) the methodological index for non-randomised studies (MINORS). Data will be analysed and summarised using meta-analysis and narrative description of the evidence across studies. This systematic review will be reported according to the Preferred Reporting Items for Systematic Reviews and Meta-Analyses Protocols (PRISMA-P) guidelines.

**Ethics and dissemination:** This systematic review will be based on published studies, thus not requiring ethical approval. Findings will be presented in conferences and published in a peer-reviewed journal.

**Trial registration number:** International Prospective Register for Systematic Reviews (PROSPERO) number CRD42017069261

### Strengths and limitations of this study

- The comprehensive search strategy of this systematic review will allow identification of a range of interventions from different LMIC published in peer-reviewed journals in English, Spanish and Portuguese.
- This protocol is co-authored by researchers from LMIC, who are native-speakers of the languages included in this systematic review. This can strengthen the review process given linguistic and cultural aspects of the diverse studies will be recognised.
- The review intends to promote voices from LMIC, who otherwise may go unheard, given relative financial barriers of LMIC research institutions and the publication bias to English.
- It is expected that there will be some variability related to methodological diversity and outcomes of the reviewed studies, due to the broad scope of PHC interventions addressing IPV, making it challenging to compare outcomes across different scenarios.

## INTRODUCTION

Intimate partner violence (IPV) is the most prevalent type of violence against women<sup>1,2</sup>. The World Health Organization (WHO) estimates that one in three women experience physical or sexual IPV during their lifetime<sup>1</sup>. IPV against women is defined by the WHO as any behaviour within an intimate relationship that causes physical damage, psychological or sexual abuse to a woman in the

1  
2  
3 relationship, including physical assault, psychological abuse, forced intercourse, and other forms of  
4 sexual coercion and of controlling behaviours<sup>2</sup>.

5  
6 The consequences of IPV for women's health have been extensively described, demonstrating that  
7 abused women have poorer health compared to women who have never been abused<sup>3 4</sup>. There are a  
8 wide range of consequences including: a) physical health, such as injuries, traumas, cardiovascular  
9 effects<sup>5</sup>; b) mental health, including depression, anxiety, post-traumatic stress disorder (PTSD),  
10 alcohol and drug abuse and suicide<sup>6</sup>; c) sexual and reproductive health, including sexually transmitted  
11 diseases (STD), miscarriage, reduced contraception and sexual autonomy<sup>7</sup>. The consequences are not  
12 only for women, but also for their children, including increased risk for low birth weight, preterm  
13 delivery, and neonatal death<sup>7</sup>.

14  
15 IPV against women is a common problem all over the world, but multicountry studies, such as the one  
16 developed by the WHO<sup>3</sup>, which compared ten different income range countries, reveal higher  
17 prevalence and the worst consequences for women from low-and-middle-income countries (LMIC)<sup>3</sup>.  
18 The World Bank classifies all countries by income, based on the gross national income (GNI) per  
19 capita per year<sup>8</sup>. This review comprises the LMIC, which are the countries with a GNI per capita  $\leq$   
20 US\$12,475 per year, as of March, 2017.

21  
22 IPV has been recognized as a public health issue and included in the agendas of public health systems  
23 worldwide<sup>2</sup>. The WHO Sustainable Development Goal number 5 aims to achieve gender equality and  
24 empower all women and girls. It includes two subitems targeting violence specifically: 5.1 'End all  
25 forms of discrimination against all women and girls everywhere'; and 5.2 'Eliminate all forms of  
26 violence against all women and girls in the public and private spheres, including trafficking and  
27 sexual and other types of exploitation'<sup>9</sup>. The World Health Assembly in 2016 recommended actions<sup>10</sup>,  
28 such as: strengthening health system leadership to prevent interpersonal violence and improving health  
29 workers'/providers' capacity to respond to violence, in particular against women and children .

30  
31 Each country responds differently to the problem in the health arena, and exchanging experiences can  
32 be a significant opportunity to foster local debate and action<sup>11</sup>. This systematic review focuses on  
33 experiences conducted within public health systems, and more specifically, in primary health care  
34 setting. Public health systems consist of systems provided and/or funded by governments aiming to  
35 promote the health of their citizens, considering health as a human right<sup>12 13</sup>. Public health systems  
36 intend to ensure that everyone has access to appropriate, efficient and quality health services, aiming  
37 for equity of access to health services for all populations<sup>14</sup>. Public health systems can have a crucial  
38 role in a multisector response to IPV, but it requires changes in the systems, coordinated planning and  
39 actions, for example, targeting different levels of care, such as primary health care (PHC)<sup>15</sup>.

40  
41 Primary health care can be considered both a philosophy and a system response to reducing health  
42 inequities and ameliorating the effects of disadvantage<sup>16</sup>. PHC is the first level of contact individuals,  
43 families and communities have with the healthcare system<sup>17</sup>. As it has a broad scope, in this study we  
44 adopt a more recent definition of PHC, consisting of 'a socially appropriate, universally accessible,  
45 scientifically sound first level care provided by health services and systems with a suitably trained  
46 workforce comprised of multidisciplinary teams supported by integrated referral systems in a way  
47 that: gives priority to those most in need and addresses health inequalities; maximises community and  
48 individual self-reliance, participation and control; and involves collaboration and partnership with  
49 other sectors to promote public health'<sup>18</sup>.

50  
51 Globally, numerous LMIC are developing innovative interventions addressing IPV against women  
52 with a focus on PHC<sup>19</sup>. However, some of these interventions may go unnoticed by mainstream  
53 researchers from high-income countries. Our hypothesis is that this could be related to different  
54 factors, such as: 1) the high costs for the development of complex interventions considered the gold  
55 standard of research (e.g.: randomised controlled trials); 2) high publication costs in prestigious  
56 academic journals, accompanied by high standards which are difficult to achieve by LMIC  
57 researchers given scarce resources, and; 3) linguistic barriers, as writing papers in English—the  
58 dominant language for publication in prestigious journals of high income countries—can be very  
59 expensive for non-English speaking researchers. However, such interventions developed in LMIC are  
60

not necessarily low quality studies. Indeed, they can be scalable and generalisable, affording insights for public health systems in other contexts, including both high-income countries and LMIC.

While previous reviews have been published in this area, they are either not systematic reviews<sup>20 21</sup>, or if systematic, did not focus solely on LMIC<sup>22</sup>. Or if focusing on LMIC, did not target specifically health systems nor PHC<sup>23</sup>. Moreover, none of the extant systematic reviews include studies in Spanish or Portuguese, nor searched regional databases for literature. Thus, this will be the first systematic review addressing IPV interventions in PHC from LMIC to include studies in English, Spanish, and Portuguese, retrieved from, amongst others, regional databases.

The focus of this systematic review on PHC rather than the whole health system, because PHC is usually the first point of entrance for women in the health system, especially in LMIC. From our previous studies<sup>24-26</sup> and the literature<sup>22</sup>, we noticed that PHC approaches to deal with IPV have some particularities, which are different from other levels of care, such as hospital settings, for example. The routines, professional training and strategies to prevent or reduce IPV can be very different across different levels of care, especially regarding low-and-middle-income contexts<sup>21 23</sup>. Consequently, the target of this review on PHC is to bring visibility to strategies conducted in this specific level of care, which is the least expensive and with greatest coverage<sup>27-29</sup>. We consider that this is of particular interest for LMIC, that could have an opportunity to manage the problem in the PHC system, with fewer resources and covering more people, compared to other levels of care. We believe that evidence from interventions developed within primary health systems from certain LMIC could provide reflections to support public health policy makers and managers to implement feasible interventions in greater scale and/or other countries.

## REVIEW QUESTIONS

- 1) To what extent do primary health care interventions within public health systems improve the health, safety and wellbeing of women survivors of IPV in LMIC?
- 2) What are the main impacts and outcomes of these interventions for PHC workers' practices and the sustainability of these practices for public health systems?

## OBJECTIVES

To conduct a systematic review of quantitative studies focusing on primary health care interventions in LMIC, with the aim of prevention or reduction of IPV alongside the improvement of survivors' health, safety and wellbeing.

## METHODS

This systematic review will be conducted and reported according to the guidelines of the Preferred Reporting Items for Systematic Reviews and Meta-Analysis Protocols (PRISMA-P)<sup>30 31</sup>, which includes the use of the PRISMA-P checklist (see appendix 1), following methodological approaches published in previous studies<sup>32</sup>. The review will be published according to the recommended items for systematic reviews based on the PRISMA statement<sup>32</sup>. This review will also be informed by the guidelines of the Cochrane Handbook<sup>33</sup> for systematic reviews of interventions to reinforce rigour along the process.

## Study registration

This systematic review is registered in the PROSPERO International Prospective Register of Systematic Reviews with number CRD42017069261.  
([http://www.crd.york.ac.uk/PROSPERO/display\\_record.asp?ID=CRD42017069261](http://www.crd.york.ac.uk/PROSPERO/display_record.asp?ID=CRD42017069261))

## Types of studies

In this review we will include studies with quantitative pre-and-post evaluation concerning PHC interventions of IPV against women from LMIC developed within their respective public health systems. For the purposes of this review, we will consider interventions as proposed by Blankenship<sup>34</sup>, consisting on actions generally taken by outsiders (often read experts), but including individuals and collectives who take actions on their own behalf, purposefully to address a particular risk or disease. This can include individual interventions (focused on individuals' knowledge, attitudes and behaviors) or structural interventions (aiming to change structural factors, such as economic, politico-legal, physical, and social environment). The interventions can include the following experimental and quasi-experimental approaches: randomised controlled trial, non-randomised controlled trial, and quasi-experimental, but also include pre-post designs. We will not include observational studies, qualitative methodologies, or prevalence studies.

We license the inclusion of a broad type of interventions by acknowledging the relatively poor funding allotted to research in LMIC. While cognisant that RCTs, for example, are the gold standard in research, and further, that the Cochrane Collaboration largely recommends methodologically-randomised studies to be the focus of review, we argue that filtering solely for such studies would miss many interventions employed in LMIC - the economic capital in LMIC simply does not allow for it. Given our aim is to "hear voices for the LMIC," and encouraged by the Cochrane's recognition that non-RCTs may be more appropriate at times<sup>33</sup>, our approach is expansive.

## Types of participants and settings

We recognise that the definition of PHC can be very complex, and subject to conceptual debate. For the purpose of this review, we will include any healthcare facility considered as a Primary Healthcare Centre, but restricted to public health services from LMIC. The WHO<sup>35</sup> defines Primary Healthcare Centres as centres providing services which are usually the first point of contact with a health professional. They include services provided by general practitioners, dentists, community nurses, pharmacists and midwives, among others. It can include, for example, General Practice Clinics, Community Based Units, Basic Health Units, Family Health Strategy, Primary Care Home Visits, Day Care Centres, Multicentre Health Clinics and One Stop Crisis Center. This review will not include studies of interventions conducted outside of PHC centres and from the public health systems, such as media campaigns, interventions in schools or in hospitals, which are considered tertiary level of care.

Interventions in PHC for IPV usually focus on workers' strategies to improve survivors' health. This can include healthcare professionals, paraprofessionals, managers and other workers, like receptionists, for example. By 'survivors'<sup>10</sup> we mean any adult women older than 16 years-old affected by IPV and part of the population of an intervention of PHC centres from low- and middle-income countries. This review will target interventions addressed to adult women, because of their particularities, approaches and outcomes, which may be different from those targeting children. The impacts of interventions for children will not be excluded, but they can provide additional information. Consequently, the impact on children will be included in secondary outcomes.

## Intervention(s), exposure

The types of interventions may include: studies about implementation of public policies to reduce/prevent IPV targeting PHC centres; education/training of PHC workers to manage IPV survivors; screening or case-finding IPV in PHC settings; strategies for organizational changes in PHC centres aiming to improve survivors' health, safety or wellbeing; therapeutic interventions for IPV focused in PHC centres.

## Comparator(s)/control

Studies with all types of control conditions will also be included in this review, including no treatment group, treatment as usual, or comparison. We will not limit our review only to studies that compare active interventions with a control condition.

## Types of outcomes measures

### Primary outcomes

Primary outcomes will include the impacts and outcomes of the intervention for:

- a) IPV, measured by validated instruments (such as the Composite Abuse Scale<sup>36</sup>, Index of Spouse Abuse<sup>37</sup>, etc.) or self-reported IPV (even if adopting unvalidated scale).
- b) women's perceived and diagnosed physical, psychological or sexual health and wellbeing, using validated instruments for each domain (such as General Health Questionnaire<sup>38</sup>, Center for Epidemiologic Studies Depression Scale - CESD<sup>39</sup> - Post Traumatic Stress Disorder Checklist<sup>40</sup>, the Short-Form Health Survey - SF-36<sup>41</sup>, etc.).
- c) women's safety, adopting validated or unvalidated measures (such as safety plans, danger assessment<sup>42</sup>, etc.).
- d) PHC workers' practices, that may include identification of abuse by workers; information-giving or safety planning and referral to other services within the public health system (such as hospitals, emergency settings, etc.) or to other services beyond the public health (such as family violence support agencies, police, justice, housing, etc.);

### Other outcomes (secondary outcomes)

Secondary outcomes will include the impacts and outcomes of the intervention for:

- a) children's health and wellbeing, considering intimate partner abuse also affects children, assessments through validated instruments regarding children's health and wellbeing will also be reviewed (such as Child Health Questionnaire – CHQ<sup>43</sup>, etc.).
- b) changes in public health systems' policies and practices, considering policies about system and worker responses; training programs in place; routine data collection; guidelines for workers; funding allocation and cost/benefit measures; and sustainability, considering for this analysis only follow-up evaluations conducted no less than 12 months after the conclusion of the intervention.

## Search strategy

A systematic search will be conducted for literature published between 1 January 2007 and 31 July 2017. We choose this time range given the first multi-country study addressing our question in the context of LMIC was published in 2006<sup>3</sup>.

The following databases will be searched: African Index Medicus, Africa Portal Digital Library, Cumulative Index to Nursing and Allied Health Literature (CINAHL), Embase, Index Medicus for the South-East Asia Region, IndMed, Latin American and Caribbean Health Science Information Database (LILACS), Medecins Sans Frontieres, Medline, Minority Health and Health Equity Archive, ProQuest, PsychInfo, Scientific Electronic Library Online (SciELO), Social Policy and Practice.

This review considers studies published in English, Spanish, and Portuguese, given these are the official languages of 69 of the 145 LMIC (World Bank). Earlier systematic reviews<sup>23</sup> concerning interventions to IPV in LMIC did not consider articles in languages other than English. This review team consists of authors native in the three languages included, minimizing bias related to language. Accordingly, keywords and MeSH will be translated from English by author 1 and reviewed by authors 3 (to Portuguese) and 4 (to Spanish).



1  
2  
3 Authors 1 and 2 independently consider keywords and MeSH headings. Any discrepancies are  
4 subjected to justification. The general search strategy is shown in appendix 2, and will be adapted and  
5 modified appropriately according to each database.

## 6 **Data collection and analysis**

### 7 **Eligibility criteria of the studies:**

8  
9 The inclusion criteria will be:

- 10 1. Studies from the eligible bibliographic databases with selected (combination of) terms and  
11 keywords (appendix 2).
- 12 2. Peer reviewed articles published in English, Spanish or Portuguese
- 13 3. Studies published between 2007 and 2017.
- 14 4. Interventions related to IPV conducted in PHC centres within the public health systems from  
15 LMIC.
- 16 5. Quantitative pre-and-post studies assessing the impacts and outcomes for survivors (adult  
17 women) and/or workers and/or public health systems.
- 18 6. Primary data collection or existing data set analysis.

19  
20  
21  
22 The exclusion criteria will be:

- 23 1. Studies published in languages other than English, Spanish or Portuguese.
- 24 2. Interventions from non-LMIC or not-conducted in PHC centres or conducted only in the  
25 private health system.
- 26 3. Studies that did not quantitatively assess pre-and-post interventions or that did not describe  
27 the impacts and outcomes for survivors (adult women), workers or public health systems.
- 28 4. Studies that do not include a primary or secondary outcome related to interventions for IPV  
29 against adult women.
- 30 5. Grey literature, including any study protocols, theses, case reports, letters, opinions,  
31 editorials, weekly reports, policy documents, congress abstracts, theoretical papers,  
32 observational studies, qualitative studies or reviews.
- 33 6. Studies published in 2006 or earlier or with the full text not available in the eligible databases.
- 34 7. Duplicate studies that have used the same study population or data. In this case, it will be used  
35 only the most recent or relevant publication, for researches published in more than one  
36 journal.

### 37 **Data management of the studies**

38  
39  
40  
41  
42  
43  
44  
45  
46  
47  
48  
49  
50  
51  
52  
53  
54  
55  
56  
57  
58  
59  
60  
61  
62  
63  
64  
65  
66  
67  
68  
69  
70  
71  
72  
73  
74  
75  
76  
77  
78  
79  
80  
81  
82  
83  
84  
85  
86  
87  
88  
89  
90  
91  
92  
93  
94  
95  
96  
97  
98  
99  
100  
101  
102  
103  
104  
105  
106  
107  
108  
109  
110  
111  
112  
113  
114  
115  
116  
117  
118  
119  
120  
121  
122  
123  
124  
125  
126  
127  
128  
129  
130  
131  
132  
133  
134  
135  
136  
137  
138  
139  
140  
141  
142  
143  
144  
145  
146  
147  
148  
149  
150  
151  
152  
153  
154  
155  
156  
157  
158  
159  
160  
161  
162  
163  
164  
165  
166  
167  
168  
169  
170  
171  
172  
173  
174  
175  
176  
177  
178  
179  
180  
181  
182  
183  
184  
185  
186  
187  
188  
189  
190  
191  
192  
193  
194  
195  
196  
197  
198  
199  
200  
201  
202  
203  
204  
205  
206  
207  
208  
209  
210  
211  
212  
213  
214  
215  
216  
217  
218  
219  
220  
221  
222  
223  
224  
225  
226  
227  
228  
229  
230  
231  
232  
233  
234  
235  
236  
237  
238  
239  
240  
241  
242  
243  
244  
245  
246  
247  
248  
249  
250  
251  
252  
253  
254  
255  
256  
257  
258  
259  
260  
261  
262  
263  
264  
265  
266  
267  
268  
269  
270  
271  
272  
273  
274  
275  
276  
277  
278  
279  
280  
281  
282  
283  
284  
285  
286  
287  
288  
289  
290  
291  
292  
293  
294  
295  
296  
297  
298  
299  
300  
301  
302  
303  
304  
305  
306  
307  
308  
309  
310  
311  
312  
313  
314  
315  
316  
317  
318  
319  
320  
321  
322  
323  
324  
325  
326  
327  
328  
329  
330  
331  
332  
333  
334  
335  
336  
337  
338  
339  
340  
341  
342  
343  
344  
345  
346  
347  
348  
349  
350  
351  
352  
353  
354  
355  
356  
357  
358  
359  
360  
361  
362  
363  
364  
365  
366  
367  
368  
369  
370  
371  
372  
373  
374  
375  
376  
377  
378  
379  
380  
381  
382  
383  
384  
385  
386  
387  
388  
389  
390  
391  
392  
393  
394  
395  
396  
397  
398  
399  
400  
401  
402  
403  
404  
405  
406  
407  
408  
409  
410  
411  
412  
413  
414  
415  
416  
417  
418  
419  
420  
421  
422  
423  
424  
425  
426  
427  
428  
429  
430  
431  
432  
433  
434  
435  
436  
437  
438  
439  
440  
441  
442  
443  
444  
445  
446  
447  
448  
449  
450  
451  
452  
453  
454  
455  
456  
457  
458  
459  
460  
461  
462  
463  
464  
465  
466  
467  
468  
469  
470  
471  
472  
473  
474  
475  
476  
477  
478  
479  
480  
481  
482  
483  
484  
485  
486  
487  
488  
489  
490  
491  
492  
493  
494  
495  
496  
497  
498  
499  
500  
501  
502  
503  
504  
505  
506  
507  
508  
509  
510  
511  
512  
513  
514  
515  
516  
517  
518  
519  
520  
521  
522  
523  
524  
525  
526  
527  
528  
529  
530  
531  
532  
533  
534  
535  
536  
537  
538  
539  
540  
541  
542  
543  
544  
545  
546  
547  
548  
549  
550  
551  
552  
553  
554  
555  
556  
557  
558  
559  
560  
561  
562  
563  
564  
565  
566  
567  
568  
569  
570  
571  
572  
573  
574  
575  
576  
577  
578  
579  
580  
581  
582  
583  
584  
585  
586  
587  
588  
589  
590  
591  
592  
593  
594  
595  
596  
597  
598  
599  
600  
601  
602  
603  
604  
605  
606  
607  
608  
609  
610  
611  
612  
613  
614  
615  
616  
617  
618  
619  
620  
621  
622  
623  
624  
625  
626  
627  
628  
629  
630  
631  
632  
633  
634  
635  
636  
637  
638  
639  
640  
641  
642  
643  
644  
645  
646  
647  
648  
649  
650  
651  
652  
653  
654  
655  
656  
657  
658  
659  
660  
661  
662  
663  
664  
665  
666  
667  
668  
669  
670  
671  
672  
673  
674  
675  
676  
677  
678  
679  
680  
681  
682  
683  
684  
685  
686  
687  
688  
689  
690  
691  
692  
693  
694  
695  
696  
697  
698  
699  
700  
701  
702  
703  
704  
705  
706  
707  
708  
709  
710  
711  
712  
713  
714  
715  
716  
717  
718  
719  
720  
721  
722  
723  
724  
725  
726  
727  
728  
729  
730  
731  
732  
733  
734  
735  
736  
737  
738  
739  
740  
741  
742  
743  
744  
745  
746  
747  
748  
749  
750  
751  
752  
753  
754  
755  
756  
757  
758  
759  
760  
761  
762  
763  
764  
765  
766  
767  
768  
769  
770  
771  
772  
773  
774  
775  
776  
777  
778  
779  
780  
781  
782  
783  
784  
785  
786  
787  
788  
789  
790  
791  
792  
793  
794  
795  
796  
797  
798  
799  
800  
801  
802  
803  
804  
805  
806  
807  
808  
809  
810  
811  
812  
813  
814  
815  
816  
817  
818  
819  
820  
821  
822  
823  
824  
825  
826  
827  
828  
829  
830  
831  
832  
833  
834  
835  
836  
837  
838  
839  
840  
841  
842  
843  
844  
845  
846  
847  
848  
849  
850  
851  
852  
853  
854  
855  
856  
857  
858  
859  
860  
861  
862  
863  
864  
865  
866  
867  
868  
869  
870  
871  
872  
873  
874  
875  
876  
877  
878  
879  
880  
881  
882  
883  
884  
885  
886  
887  
888  
889  
890  
891  
892  
893  
894  
895  
896  
897  
898  
899  
900  
901  
902  
903  
904  
905  
906  
907  
908  
909  
910  
911  
912  
913  
914  
915  
916  
917  
918  
919  
920  
921  
922  
923  
924  
925  
926  
927  
928  
929  
930  
931  
932  
933  
934  
935  
936  
937  
938  
939  
940  
941  
942  
943  
944  
945  
946  
947  
948  
949  
950  
951  
952  
953  
954  
955  
956  
957  
958  
959  
960  
961  
962  
963  
964  
965  
966  
967  
968  
969  
970  
971  
972  
973  
974  
975  
976  
977  
978  
979  
980  
981  
982  
983  
984  
985  
986  
987  
988  
989  
990  
991  
992  
993  
994  
995  
996  
997  
998  
999  
1000

COVIDENCE ([www.covidence.org](http://www.covidence.org)) will be employed to manage retrieved studies and to conduct the systematic review process. The bibliographic software platform Endnote (online version [www.myendnoteweb.com](http://www.myendnoteweb.com)) will also be used to manage and store relevant studies for this review. These softwares will remove duplicates thereby cleaning the sample. A checklist will be developed based on the eligibility criteria of this review. The flow diagram showing the main steps of this systematic review is available on Appendix 3, following the PRISMA statement<sup>30,31</sup>.

### 51 **Data selection of the studies**

52  
53  
54  
55  
56  
57  
58  
59  
60  
61  
62  
63  
64  
65  
66  
67  
68  
69  
70  
71  
72  
73  
74  
75  
76  
77  
78  
79  
80  
81  
82  
83  
84  
85  
86  
87  
88  
89  
90  
91  
92  
93  
94  
95  
96  
97  
98  
99  
100  
101  
102  
103  
104  
105  
106  
107  
108  
109  
110  
111  
112  
113  
114  
115  
116  
117  
118  
119  
120  
121  
122  
123  
124  
125  
126  
127  
128  
129  
130  
131  
132  
133  
134  
135  
136  
137  
138  
139  
140  
141  
142  
143  
144  
145  
146  
147  
148  
149  
150  
151  
152  
153  
154  
155  
156  
157  
158  
159  
160  
161  
162  
163  
164  
165  
166  
167  
168  
169  
170  
171  
172  
173  
174  
175  
176  
177  
178  
179  
180  
181  
182  
183  
184  
185  
186  
187  
188  
189  
190  
191  
192  
193  
194  
195  
196  
197  
198  
199  
200  
201  
202  
203  
204  
205  
206  
207  
208  
209  
210  
211  
212  
213  
214  
215  
216  
217  
218  
219  
220  
221  
222  
223  
224  
225  
226  
227  
228  
229  
230  
231  
232  
233  
234  
235  
236  
237  
238  
239  
240  
241  
242  
243  
244  
245  
246  
247  
248  
249  
250  
251  
252  
253  
254  
255  
256  
257  
258  
259  
260  
261  
262  
263  
264  
265  
266  
267  
268  
269  
270  
271  
272  
273  
274  
275  
276  
277  
278  
279  
280  
281  
282  
283  
284  
285  
286  
287  
288  
289  
290  
291  
292  
293  
294  
295  
296  
297  
298  
299  
300  
301  
302  
303  
304  
305  
306  
307  
308  
309  
310  
311  
312  
313  
314  
315  
316  
317  
318  
319  
320  
321  
322  
323  
324  
325  
326  
327  
328  
329  
330  
331  
332  
333  
334  
335  
336  
337  
338  
339  
340  
341  
342  
343  
344  
345  
346  
347  
348  
349  
350  
351  
352  
353  
354  
355  
356  
357  
358  
359  
360  
361  
362  
363  
364  
365  
366  
367  
368  
369  
370  
371  
372  
373  
374  
375  
376  
377  
378  
379  
380  
381  
382  
383  
384  
385  
386  
387  
388  
389  
390  
391  
392  
393  
394  
395  
396  
397  
398  
399  
400  
401  
402  
403  
404  
405  
406  
407  
408  
409  
410  
411  
412  
413  
414  
415  
416  
417  
418  
419  
420  
421  
422  
423  
424  
425  
426  
427  
428  
429  
430  
431  
432  
433  
434  
435  
436  
437  
438  
439  
440  
441  
442  
443  
444  
445  
446  
447  
448  
449  
450  
451  
452  
453  
454  
455  
456  
457  
458  
459  
460  
461  
462  
463  
464  
465  
466  
467  
468  
469  
470  
471  
472  
473  
474  
475  
476  
477  
478  
479  
480  
481  
482  
483  
484  
485  
486  
487  
488  
489  
490  
491  
492  
493  
494  
495  
496  
497  
498  
499  
500  
501  
502  
503  
504  
505  
506  
507  
508  
509  
510  
511  
512  
513  
514  
515  
516  
517  
518  
519  
520  
521  
522  
523  
524  
525  
526  
527  
528  
529  
530  
531  
532  
533  
534  
535  
536  
537  
538  
539  
540  
541  
542  
543  
544  
545  
546  
547  
548  
549  
550  
551  
552  
553  
554  
555  
556  
557  
558  
559  
560  
561  
562  
563  
564  
565  
566  
567  
568  
569  
570  
571  
572  
573  
574  
575  
576  
577  
578  
579  
580  
581  
582  
583  
584  
585  
586  
587  
588  
589  
590  
591  
592  
593  
594  
595  
596  
597  
598  
599  
600  
601  
602  
603  
604  
605  
606  
607  
608  
609  
610  
611  
612  
613  
614  
615  
616  
617  
618  
619  
620  
621  
622  
623  
624  
625  
626  
627  
628  
629  
630  
631  
632  
633  
634  
635  
636  
637  
638  
639  
640  
641  
642  
643  
644  
645  
646  
647  
648  
649  
650  
651  
652  
653  
654  
655  
656  
657  
658  
659  
660  
661  
662  
663  
664  
665  
666  
667  
668  
669  
670  
671  
672  
673  
674  
675  
676  
677  
678  
679  
680  
681  
682  
683  
684  
685  
686  
687  
688  
689  
690  
691  
692  
693  
694  
695  
696  
697  
698  
699  
700  
701  
702  
703  
704  
705  
706  
707  
708  
709  
710  
711  
712  
713  
714  
715  
716  
717  
718  
719  
720  
721  
722  
723  
724  
725  
726  
727  
728  
729  
730  
731  
732  
733  
734  
735  
736  
737  
738  
739  
740  
741  
742  
743  
744  
745  
746  
747  
748  
749  
750  
751  
752  
753  
754  
755  
756  
757  
758  
759  
760  
761  
762  
763  
764  
765  
766  
767  
768  
769  
770  
771  
772  
773  
774  
775  
776  
777  
778  
779  
780  
781  
782  
783  
784  
785  
786  
787  
788  
789  
790  
791  
792  
793  
794  
795  
796  
797  
798  
799  
800  
801  
802  
803  
804  
805  
806  
807  
808  
809  
810  
811  
812  
813  
814  
815  
816  
817  
818  
819  
820  
821  
822  
823  
824  
825  
826  
827  
828  
829  
830  
831  
832  
833  
834  
835  
836  
837  
838  
839  
840  
841  
842  
843  
844  
845  
846  
847  
848  
849  
850  
851  
852  
853  
854  
855  
856  
857  
858  
859  
860  
861  
862  
863  
864  
865  
866  
867  
868  
869  
870  
871  
872  
873  
874  
875  
876  
877  
878  
879  
880  
881  
882  
883  
884  
885  
886  
887  
888  
889  
890  
891  
892  
893  
894  
895  
896  
897  
898  
899  
900  
901  
902  
903  
904  
905  
906  
907  
908  
909  
910  
911  
912  
913  
914  
915  
916  
917  
918  
919  
920  
921  
922  
923  
924  
925  
926  
927  
928  
929  
930  
931  
932  
933  
934  
935  
936  
937  
938  
939  
940  
941  
942  
943  
944  
945  
946  
947  
948  
949  
950  
951  
952  
953  
954  
955  
956  
957  
958  
959  
960  
961  
962  
963  
964  
965  
966  
967  
968  
969  
970  
971  
972  
973  
974  
975  
976  
977  
978  
979  
980  
981  
982  
983  
984  
985  
986  
987  
988  
989  
990  
991  
992  
993  
994  
995  
996  
997  
998  
999  
1000

The first step consists of the screening of potential studies. This will be done independently and blinded by two investigators fluent in the three languages included in this review (Authors 1 and 3). They will analyse titles and abstracts of all non-duplicate papers from the electronic search, assessing their eligibility. This process of double blinded screening was previously described<sup>44</sup> for rigorous systematic reviews. Some papers may not describe precisely their abstracts, so a careful search is

1  
2  
3 proposed to maximise the inclusion of studies. Following Ayala-Quintanilla and colleagues<sup>44</sup>, if there  
4 is uncertainty about the inclusion of a certain study in this step, that study will be temporarily  
5 included and will proceed to the next step for more evaluation. Considering all the selected databases  
6 provide an English version of their titles and abstracts, a librarian (Author 2) will cross-check this first  
7 step, comparing the independent results obtained from each investigator and ensuring that all steps  
8 were conducted in compliance with the protocol. If there is any uncertainty between the resultant  
9 studies, the librarian will seek for an opinion from one of the advisors (Authors 5 and 6) that compose  
10 this review team.

11  
12 The second step consists of examining the full version of all selected studies from the first step,  
13 concerning the selection criteria. Two investigators will analyse independently all the articles for each  
14 language. The librarian will double check it this process.

15  
16 The final list of selected studies will be reviewed independently. For each exclusion, justification will  
17 be documented. The results will be compared by the librarian, and any disagreements will be  
18 discussed and if necessary, consultation with a third author will occur to reach the consensus.

### 19 **Appraisal/assessment of the risk of bias of the included studies**

20  
21 It is expected that eligible studies will vary according to their methodological approach. There is a  
22 vast range of tools to assess the quality and bias of studies. Nevertheless, evaluating such biases and  
23 qualities is a challenging task and there is no consensus to conduct it.

24  
25 Grading of Recommendations, Assessment, Development and Evaluation (GRADE)<sup>45</sup> and the  
26 EQUATOR (Enhancing the Quality and Transparency of health Research) Network<sup>46</sup> provide support  
27 with guidelines and tools to evaluate the studies, rating up according to the level of evidence.

28  
29 In this review, to minimize the risk of bias and evaluate the quality of evidence of each article  
30 included, we will adopt: 1) the Cochrane Collaboration's tool for assessing risk of bias for randomised  
31 controlled trials<sup>47</sup>; 2) the Methodological index for non-randomised studies (MINORS)<sup>48</sup> to assess  
32 non-randomised interventional studies. This process will be independently performed by different  
33 authors (two authors for articles written in English, two for studies written in Portuguese, and two for  
34 articles in Spanish) and any disagreement will be discussed and resolved by a third author, if needed.

### 35 **Data extraction**

36  
37 For this third step, three investigators (Authors 1, 3 and 4) will independently and blindly extract all  
38 data items (see appendix 4) of each included study with a standardised data collection form. The first  
39 author will extract data from studies in English and Portuguese. The third author will extract data  
40 from studies in Portuguese and Spanish, while the fourth author will collect from Spanish and  
41 English. All extracted data will be converted into English by authors for articles in Spanish or  
42 Portuguese, to allow the analysis by all authors in a common language for all. To guarantee that no  
43 errors will be made, the librarian (Author 2) will randomly cross-check these data. Any disagreements  
44 will be resolved by consensus between the two authors collecting each language and a third author  
45 (Author 5 or 6) can be arbitrator if consensus is not reached, following other systematic review  
46 protocols<sup>44</sup>.

### 47 **Data items**

48  
49 The descriptive items that will be collected are (see appendix 4): (1) general information and  
50 characteristics of the study, including the country/place, type of service where it was conducted, target  
51 participants and their main sociodemographic characteristics; (2) methodological characteristics,  
52 including the type of method and how data/information were collected, components that were  
53 analysed/; (3) impacts and outcomes for survivors, including IPV rates, women's health, safety and  
54 wellbeing and also impacts for their children; (4) impacts and outcomes for PHC workers, including  
55  
56  
57  
58  
59

1  
2  
3 types of workers, their roles and concerning measures; (5) impacts and outcomes for the public health  
4 systems, including measures of articulation with other levels of care (for example, hospitals,  
5 emergency units, intensive care units, etc) and other sectors beyond the public health (for example,  
6 housing, financing, police, justice, social services, etc), and also evaluation of costs and sustainability  
7 of the intervention. For items 3, 4 and 5, we will also collect information about barriers and  
8 facilitators for each of the three components (survivors, workers and systems), if available.  
9

### 10 11 **Data synthesis and analysis**

12  
13 Data extracted will be analysed and summarised aiming to answer the research questions. Data will be  
14 summarised according to the outcomes: 1) for survivors, including their health, safety and wellbeing  
15 as well as impacts on IPV rates; 2) for PHC workers' practices considering their role to improve  
16 survivors' health care, and 3) for public health systems, including evaluation of costs and  
17 sustainability.  
18

19 When appropriate, a meta-analysis can be conducted, if a sufficient number of trials are identified  
20 with sufficient homogeneity. The meta-analysis will be conducted with aggregate data, rather than at  
21 the individual participant level. Continuous and categorical variables will be summarised according to  
22 the presentation of data of each study. Dichotomous outcome data (yes/no experience of IPV) will be  
23 described as risk ratios with their 95% confidence intervals. It will also be indicated if those findings  
24 were adjusted for confounders. It is anticipated that there will be some variability of reporting impacts  
25 and outcomes of interventions across studies. In this case, a narrative description of the available  
26 evidence will be conducted instead. This will consider which results are significant and their  
27 association with the outcomes, based on data availability across studies.  
28

29 This review will present the results reported in the original studies, however authors may be contacted  
30 for relevant primary source of data. As indicated previously, we will calculate data, where possible,  
31 using the original information from the study such as for IPV or women's health, safety and  
32 wellbeing. In addition, quantitative data from figures can be utilised if there is sufficient information  
33 reported/explained in the study.  
34

35 Additional data analysis can be made in order to assess the comparisons between studies, if possible.  
36 Qualitative synthesis of relevant process evaluations of included studies will be reported descriptively,  
37 restricting to qualitative components from eligible quantitative studies.  
38

39 For duplicate studies that have used the same study population or data, the most recent or relevant  
40 publication will be utilised for studies published in more than one journal, if possible the data will be  
41 linked together.  
42

43 In summary, data analysis will be performed according to the data availability of eligible studies, and  
44 statistical expertise will be consulted as needed. The software STATA (version 15) will be utilised for  
45 all the quantitative analyses. We will relatively give more weight in the synthesis to results from  
46 studies with stronger design.  
47

### 48 **Cochrane's recommendations for reviews in public health**

49  
50 This review will follow some of the Cochrane guidelines for reviews conducted in public health and  
51 health promotion scenarios. One of the key points is sustainability, referred by The Cochrane  
52 Collaboration Group<sup>33</sup> as an important aspect to be included in systematic reviews in public health  
53 contexts, because it is likely to increase the concern of policymakers, practitioners and funders. When  
54 sustainability was measured in eligible studies we will look for additional explanations about which  
55 outcomes were measured over what period. However, if it was not measured, but authors explore the  
56  
57  
58  
59

potential for sustainability it will also be summarised.

Another Cochrane<sup>33</sup> recommendation for systematic reviews in public health is the consideration of applicability and transferability. Applicability refers to how the findings of a given study or review can be translated into specific population or settings. Transferability is also referred as the potential for this translation occurs. If the reviewed studies mention these aspects, they will also be included in the analysis.

### **Economic evidence**

Cochrane<sup>33</sup> recommends the review of economic evidence, because it provides additional information for decision makers, considering not only if a strategy or intervention works, but also whether its adoption will improve the use of resources. The economic issues are not the main objective of this review, therefore, it will not be an inclusion or exclusion criteria, but will compose an additional source of information when mentioned in the studies. We believe this information will be particularly important for LMIC and summary will be presented when described in eligible studies.

### **PRESENTING AND REPORTING THE RESULTS**

The process of selection of eligible studies for the systematic review will follow the flow diagram according to guidelines of the PRISMA-P (appendix 1). The main steps of the review will include: the identification of studies, screening, evaluation according to inclusion/exclusion criteria and analysis of eligible studies. Results will be presented according to the outcomes: for survivors; for PHC workers; and for public health systems. Data will be summarized in tables depending on data from each study, but presenting first author's name, country, year of publication, study design, aims and main outcomes.

### **POTENTIAL AMENDMENTS**

This protocol is designed to guide with rigour all the steps of this systematic review. Amendments are not expected, but if necessary, just in case of any unexpected event, they will be reported in a detailed and consistent way, followed by appropriate justification. The same will be applied to any differences between the protocol and the review. In case of differences, they will be fully described in a specific section of the final review, providing rationale for them.

### **CONCLUSION AND IMPLICATIONS**

Intimate partner violence is one of the main public health problems for women's health, safety and wellbeing. It requires effective and sustainable actions to reduce harm and life-threatening, targeting comprehensive interventions, particularly in primary health care settings in low-and-middle income contexts. This challenge is more severe in developing countries and exchanging effective interventions can be a coordinated way to foster debate and action. This review will systematise the knowledge previously produced, identifying research gaps and opportunities on interventions conducted in LMIC.

IPV is a potentially preventable issue, but its complexity requires the articulation of different sectors (including health systems, education, justice, among others), in different levels (highlighting the key potential role of the primary care level, but connecting to other levels), with collaboration of different actors (such as health professionals, managers, police, etc.) and with different targets (survivors, perpetrators, families, communities, etc.).

Facing this complex scenario, it is significant to recognize the limitations of this review, such as the types of studies included, that do not include all possible methodological approaches conducted in LMIC. Another limitation is the possible diversity of interventions, that can be challenging to be compared and systematised. It could be possible that other relevant studies will be excluded, since this

1  
2  
3 review includes only studies published in English, Portuguese and Spanish. Another potential  
4 limitation may be that funding for rigorous studies of IPV interventions has only been fostered in the  
5 past few years, potentially limiting the ability to identify relevant studies in the review time period. In  
6 a systematic review, this limitation may also become a study finding, since a dearth of evidence is, in  
7 itself, useful to inform the field.

8  
9 It is important to mention that the findings of this systematic review will be cautiously interpreted and  
10 the conclusions will be presented with parsimony, considering such limitations. This review will only  
11 focus in a 'tip of the iceberg', but it can raise questions for future studies with focus, for example, in  
12 other levels of care or in other sectors rather than the public health or even including other  
13 methodological approaches, such as qualitative studies, which have been extensively reported in  
14 LMIC.  
15

## 16 17 **ETHICS AND DISSEMINATION**

### 18 19 **Ethical issues**

20  
21 This systematic review is based on studies previously published and does not include collection of  
22 new primary data. Consequently, the host university has stated that is not necessary to obtain ethical  
23 clearance.  
24

### 25 26 **Publication Plan**

27 This review will be publicized in conferences (preliminary results) and the final article will be  
28 published in a peer-reviewed journal. We intend to publish both the protocol and the systematic  
29 review in open access journals, aiming to be accessible to investigators currently engaged in  
30 interventions in low-and-middle-income countries. This review affords a voice to researchers in the  
31 field of IPV who would otherwise go unheard, and provide greater insights into the range of possible  
32 interventions for nations facing comparable issues. It is expected that the final publication can support  
33 public systems and policies worldwide.  
34

### 35 36 **Author's contributions**

37 MS conceived the review. SH, BQ, DO and AT assisted on the design of the study protocol. MS and  
38 SH drafted the protocol paper and all authors edited the subsequent versions. AT and KH critically  
39 revised the methodology. All authors have reviewed and approved the final version of the text. MS is  
40 the guarantor of the review.

41 **Funding:** This work was supported by the Brazilian CAPES Foundation which funded a scholarship  
42 for postdoctoral studies of the first author [Process number 88881.119273/2016-01]. The funder had  
43 no role on this protocol development.  
44  
45

46  
47 **Competing interests:** none  
48  
49

## 50 51 **REFERENCES**

- 52  
53 1. WHO. Global and regional estimates of violence against women: prevalence and health effects of  
54 intimate partner violence and non-partner sexual violence. Geneva: World Health  
55 Organization Department of Reproductive Health and Research, London School of Hygiene  
56 and Tropical Medicine, South African Medical Research Council., 2013.  
57  
58  
59  
60



- 1
  - 2
  - 3
  - 4
  - 5
  - 6
  - 7
  - 8
  - 9
  - 10
  - 11
  - 12
  - 13
  - 14
  - 15
  - 16
  - 17
  - 18
  - 19
  - 20
  - 21
  - 22
  - 23
  - 24
  - 25
  - 26
  - 27
  - 28
  - 29
  - 30
  - 31
  - 32
  - 33
  - 34
  - 35
  - 36
  - 37
  - 38
  - 39
  - 40
  - 41
  - 42
  - 43
  - 44
  - 45
  - 46
  - 47
  - 48
  - 49
  - 50
  - 51
  - 52
  - 53
  - 54
  - 55
  - 56
  - 57
  - 58
  - 59
  - 60
2. Krug EG, Mercy JA, Dahlberg LL, et al. The world report on violence and health. *Lancet* 2002;360(9339):1083-8. doi: 10.1016/S0140-6736(02)11133-0
  3. Garcia-Moreno C, Jansen HA, Ellsberg M, et al. Prevalence of intimate partner violence: findings from the WHO multi-country study on women's health and domestic violence. *Lancet* 2006;368(9543):1260-9. doi: 10.1016/S0140-6736(06)69523-8
  4. Campbell JC. Health consequences of intimate partner violence. *Lancet* 2002;359(9314):1331-6. doi: 10.1016/S0140-6736(02)08336-8
  5. Coker AL, Davis KE, Arias I, et al. Physical and mental health effects of intimate partner violence for men and women. *Am J Prev Med* 2002;23(4):260-8.
  6. Dutton MA, Green BL, Kaltman SI, et al. Intimate partner violence, PTSD, and adverse health outcomes. *J Interpers Violence* 2006;21(7):955-68. doi: 10.1177/0886260506289178
  7. Sarkar NN. The impact of intimate partner violence on women's reproductive health and pregnancy outcome. *J Obstet Gynaecol* 2008;28(3):266-71. doi: 10.1080/01443610802042415
  8. World Bank Country and Lending Groups. Washington: World Bank, 2017.
  9. UN. Transforming our world: the 2030 agenda for sustainable development. New York: United Nations, 2015:31.
  10. Organization WH. Global plan of action to strengthen the role of the health system within a national multisectoral response to address interpersonal violence, in particular against women and girls, and against children. In: research Dfrha, ed. Geneva: WHO, 2016:76.
  11. Signorelli MC, Taft A, Pereira PP. Intimate partner violence against women and healthcare in Australia: charting the scene. *Cien Saude Colet* 2012;17(4):1037-48.
  12. Carvalho G. A saúde pública no Brasil. *Estudos Avançados* 2013;27(78):20. doi: <http://dx.doi.org/10.1590/S0103-40142013000200002>
  13. Aboal-Viñas JL. Salud pública y sistema sanitario. *Gaceta Sanitaria* 2010;4(Supplement 1):7. doi: <https://doi.org/10.1016/j.gaceta.2010.08.003>
  14. Naidoo S. The South African national health insurance: a revolution in health-care delivery! *J Public Health (Oxf)* 2012;34(1):149-50. doi: 10.1093/pubmed/fds008
  15. García-Moreno C, Hegarty K, d'Oliveira AF, et al. The health-systems response to violence against women. *Lancet* 2015;385(9977):1567-79. doi: 10.1016/S0140-6736(14)61837-7 [published Online First: 2014/11/21]
  16. Keleher H. Why primary health care offers a more comprehensive approach to tackling health inequities than primary care. *Australian Journal of Primary Health* 2001;7(2):5.
  17. Care ICoPH. Declaration of Alma-Ata. *WHO Chron* 1978;32(11):428-30.
  18. (APHCRI) APHCRI. What is primary health care? In: (APHCRI) APHCRI, ed. Canberra: Australian Primary Health Care Research Institute (APHCRI), 2009.
  19. Abramsky T, Devries K, Kiss L, et al. Findings from the SASA! Study: a cluster randomized controlled trial to assess the impact of a community mobilization intervention to prevent violence against women and reduce HIV risk in Kampala, Uganda. *BMC Med* 2014;12(1):122. doi: 10.1186/s12916-014-0122-5
  20. Colombini M, Mayhew S, Watts C. Health-sector responses to intimate partner violence in low- and middle-income settings: a review of current models, challenges and opportunities. *Bull World Health Organ* 2008;86(8):635-42.
  21. Bacchus LJ, Colombini M, Contreras Urbina M, et al. Exploring opportunities for coordinated responses to intimate partner violence and child maltreatment in low and middle income countries: a scoping review. *Psychol Health Med* 2017;22(sup1):135-65. doi: 10.1080/13548506.2016.1274410 [published Online First: 2017/02/02]
  22. Bair-Merritt MH, Lewis-O'Connor A, Goel S, et al. Primary care-based interventions for intimate partner violence: a systematic review. *Am J Prev Med* 2014;46(2):188-94. doi: 10.1016/j.amepre.2013.10.001
  23. Bourey C, Williams W, Bernstein EE, et al. Systematic review of structural interventions for intimate partner violence in low- and middle-income countries: organizing evidence for prevention. *BMC Public Health* 2015;15:1165. doi: 10.1186/s12889-015-2460-4 [published Online First: 2015/11/23]
  24. Hegarty K, Tarzia L, Hooker L, et al. Interventions to support recovery after domestic and sexual violence in primary care. *Int Rev Psychiatry* 2016;28(5):519-32. doi:



- 10.1080/09540261.2016.1210103 [published Online First: 2016/08/09]
25. Taft AJ, Hooker L, Humphreys C, et al. Maternal and child health nurse screening and care for mothers experiencing domestic violence (MOVE): a cluster randomised trial. *BMC Med* 2015;13:150. doi: 10.1186/s12916-015-0375-7 [published Online First: 2015/06/25]
  26. Signorelli MC, Auad D, Pereira PP. Domestic violence against women and professional intervention in primary healthcare: an ethnographic study in Matinhos, Paraná State, Brazil. *Cad Saude Publica* 2013;29(6):1230-40.
  27. Starfield B, Shi L, Macinko J. Contribution of primary care to health systems and health. *Milbank Q* 2005;83(3):457-502. doi: 10.1111/j.1468-0009.2005.00409.x
  28. Kruk ME, Porignon D, Rockers PC, et al. The contribution of primary care to health and health systems in low- and middle-income countries: a critical review of major primary care initiatives. *Soc Sci Med* 2010;70(6):904-11. doi: 10.1016/j.socscimed.2009.11.025 [published Online First: 2010/01/19]
  29. Chan M. Ten years in public health, 2007–2017. In: Organization WH, ed. Geneva: World Health Organization, 2017:152.
  30. Moher D, Shamseer L, Clarke M, et al. Preferred reporting items for systematic review and meta-analysis protocols (PRISMA-P) 2015 statement. *Syst Rev* 2015;4:1. doi: 10.1186/2046-4053-4-1 [published Online First: 2015/01/01]
  31. Shamseer L, Moher D, Clarke M, et al. Preferred reporting items for systematic review and meta-analysis protocols (PRISMA-P) 2015: elaboration and explanation. *BMJ* 2015;349:g7647. [published Online First: 2015/01/02]
  32. Moher D, Liberati A, Tetzlaff J, et al. Preferred reporting items for systematic reviews and meta-analyses: the PRISMA statement. *J Clin Epidemiol* 2009;62(10):1006-12. doi: 10.1016/j.jclinepi.2009.06.005 [published Online First: 2009/07/23]
  33. Higgins J, Green S, editors. *Cochrane Handbook for Systematic Reviews of Interventions*. West Sussex: The Cochrane Collaboration and John Wiley & Sons, 2008.
  34. Blankenship KM, Friedman SR, Dworkin S, et al. Structural interventions: concepts, challenges and opportunities for research. *J Urban Health* 2006;83(1):59-72. doi: 10.1007/s11524-005-9007-4
  35. WHO Guidelines on Hand Hygiene in Health Care: First Global Patient Safety Challenge Clean Care Is Safer Care. Appendix 1 Definitions of health-care settings and other related terms. Geneva: World Health Organization, 2009.
  36. Hegarty K, Fracgp, Bush R, et al. The composite abuse scale: further development and assessment of reliability and validity of a multidimensional partner abuse measure in clinical settings. *Violence Vict* 2005;20(5):529-47.
  37. Campbell DW, Campbell J, King C, et al. The reliability and factor structure of the index of spouse abuse with African-American women. *Violence Vict* 1994;9(3):259-74.
  38. Goldberg DP, Hillier VF. A scaled version of the General Health Questionnaire. *Psychol Med* 1979;9(1):139-45.
  39. Eaton W, Smith C, Ybarra M, et al. Center for Epidemiologic Studies Depression Scale: review and revision (CESD and CESD-R). In: Maruish M, ed. *The Use of Psychological Testing for Treatment Planning and Outcomes Assessment*. 3 ed. Mahwah, NJ: Lawrence Erlbaum Associates, Inc 2004.
  40. Lang AJ, Stein MB. An abbreviated PTSD checklist for use as a screening instrument in primary care. *Behav Res Ther* 2005;43(5):585-94. doi: 10.1016/j.brat.2004.04.005
  41. Ware JE, Sherbourne CD. The MOS 36-item short-form health survey (SF-36). I. Conceptual framework and item selection. *Med Care* 1992;30(6):473-83.
  42. Campbell JC. Nursing assessment for risk of homicide with battered women. *ANS Adv Nurs Sci* 1986;8(4):36-51.
  43. Landgraf J, Abetz L, Ware J. *The Child Health Questionnaire (CHQ) user's manual*. 1st ed. ed. Boston: TheHealth Institute, New England Medical Centre, 1996.
  44. Ayala Quintanilla BP, Taft A, McDonald S, et al. Social determinants and maternal exposure to intimate partner violence of obstetric patients with severe maternal morbidity in the intensive care unit: a systematic review protocol. *BMJ Open* 2016;6(11):e013270. doi:

- 1  
2  
3 10.1136/bmjopen-2016-013270 [published Online First: 2016/11/28]  
4 45. Schünemann HJ, Schünemann AH, Oxman AD, et al. Grading quality of evidence and strength of  
5 recommendations for diagnostic tests and strategies. *BMJ* 2008;336(7653):1106-10. doi:  
6 10.1136/bmj.39500.677199.AE  
7 46. Pandis N, Fedorowicz Z. The international EQUATOR network: enhancing the quality and  
8 transparency of health care research. *J Appl Oral Sci* 2011;19(5)  
9 47. Higgins JP, Altman DG, Gøtzsche PC, et al. The Cochrane Collaboration's tool for assessing risk  
10 of bias in randomised trials. *BMJ* 2011;343:d5928. [published Online First: 2011/10/18]  
11 48. Slim K, Nini E, Forestier D, et al. Methodological index for non-randomized studies (minors):  
12 development and validation of a new instrument. *ANZ J Surg* 2003;73(9):712-6.  
13  
14  
15  
16  
17  
18  
19  
20  
21  
22  
23  
24  
25  
26  
27  
28  
29  
30  
31  
32  
33  
34  
35  
36  
37  
38  
39  
40  
41  
42  
43  
44  
45  
46  
47  
48  
49  
50  
51  
52  
53  
54  
55  
56  
57  
58  
59  
60

## Appendix 1 - PRISMA-P (Preferred Reporting Items for Systematic review and Meta-Analysis Protocols) 2015 checklist: recommended items to address in a systematic review protocol\*

| Section and topic                 | Item No | Checklist item                                                                                                                                                                                                                | Page number                 |
|-----------------------------------|---------|-------------------------------------------------------------------------------------------------------------------------------------------------------------------------------------------------------------------------------|-----------------------------|
| <b>ADMINISTRATIVE INFORMATION</b> |         |                                                                                                                                                                                                                               |                             |
| Title:                            |         |                                                                                                                                                                                                                               |                             |
| Identification                    | 1a      | Identify the report as a protocol of a systematic review                                                                                                                                                                      | 1                           |
| Update                            | 1b      | If the protocol is for an update of a previous systematic review, identify as such                                                                                                                                            | Not an update               |
| Registration                      | 2       | If registered, provide the name of the registry (such as PROSPERO) and registration number                                                                                                                                    | PROSPERO<br>CRD420170692613 |
| Authors:                          |         |                                                                                                                                                                                                                               |                             |
| Contact                           | 3a      | Provide name, institutional affiliation, e-mail address of all protocol authors; provide physical mailing address of corresponding author                                                                                     | 1-2                         |
| Contributions                     | 3b      | Describe contributions of protocol authors and identify the guarantor of the review                                                                                                                                           | 12                          |
| Amendments                        | 4       | If the protocol represents an amendment of a previously completed or published protocol, identify as such and list changes; otherwise, state plan for documenting important protocol amendments                               | Not applicable              |
| Support:                          |         |                                                                                                                                                                                                                               |                             |
| Sources                           | 5a      | Indicate sources of financial or other support for the review                                                                                                                                                                 | 12                          |
| Sponsor                           | 5b      | Provide name for the review funder and/or sponsor                                                                                                                                                                             | 12                          |
| Role of sponsor or funder         | 5c      | Describe roles of funder(s), sponsor(s), and/or institution(s), if any, in developing the protocol                                                                                                                            | 12                          |
| <b>INTRODUCTION</b>               |         |                                                                                                                                                                                                                               |                             |
| Rationale                         | 6       | Describe the rationale for the review in the context of what is already known                                                                                                                                                 | 3-5                         |
| Objectives                        | 7       | Provide an explicit statement of the question(s) the review will address with reference to participants, interventions, comparators, and outcomes (PICO)                                                                      | 5                           |
| <b>METHODS</b>                    |         |                                                                                                                                                                                                                               |                             |
| Eligibility criteria              | 8       | Specify the study characteristics (such as PICO, study design, setting, time frame) and report characteristics (such as years considered, language, publication status) to be used as criteria for eligibility for the review | 6-8                         |
| Information sources               | 9       | Describe all intended information sources (such as electronic databases, contact with study authors, trial registers or other grey literature sources) with planned dates of coverage                                         | 7                           |

|                                    |     |                                                                                                                                                                                                                                                     |                  |
|------------------------------------|-----|-----------------------------------------------------------------------------------------------------------------------------------------------------------------------------------------------------------------------------------------------------|------------------|
| Search strategy                    | 10  | Present draft of search strategy to be used for at least one electronic database, including planned limits, such that it could be repeated                                                                                                          | Appendix 2       |
| Study records:                     |     |                                                                                                                                                                                                                                                     |                  |
| Data management                    | 11a | Describe the mechanism(s) that will be used to manage records and data throughout the review                                                                                                                                                        | 8                |
| Selection process                  | 11b | State the process that will be used for selecting studies (such as two independent reviewers) through each phase of the review (that is, screening, eligibility and inclusion in meta-analysis)                                                     | 8                |
| Data collection process            | 11c | Describe planned method of extracting data from reports (such as piloting forms, done independently, in duplicate), any processes for obtaining and confirming data from investigators                                                              | 9                |
| Data items                         | 12  | List and define all variables for which data will be sought (such as PICO items, funding sources), any pre-planned data assumptions and simplifications                                                                                             | 9 and Appendix 4 |
| Outcomes and prioritization        | 13  | List and define all outcomes for which data will be sought, including prioritization of main and additional outcomes, with rationale                                                                                                                | 7                |
| Risk of bias in individual studies | 14  | Describe anticipated methods for assessing risk of bias of individual studies, including whether this will be done at the outcome or study level, or both; state how this information will be used in data synthesis                                | 9                |
| Data synthesis                     | 15a | Describe criteria under which study data will be quantitatively synthesised                                                                                                                                                                         | 10               |
|                                    | 15b | If data are appropriate for quantitative synthesis, describe planned summary measures, methods of handling data and methods of combining data from studies, including any planned exploration of consistency (such as I <sup>2</sup> , Kendall's τ) | 10               |
|                                    | 15c | Describe any proposed additional analyses (such as sensitivity or subgroup analyses, meta-regression)                                                                                                                                               | Not applicable   |
|                                    | 15d | If quantitative synthesis is not appropriate, describe the type of summary planned                                                                                                                                                                  | 10-11            |
| Meta-bias(es)                      | 16  | Specify any planned assessment of meta-bias(es) (such as publication bias across studies, selective reporting within studies)                                                                                                                       | Not applicable   |
| Confidence in cumulative evidence  | 17  | Describe how the strength of the body of evidence will be assessed (such as GRADE)                                                                                                                                                                  | 9-10             |

**\* It is strongly recommended that this checklist be read in conjunction with the PRISMA-P Explanation and Elaboration (cite when available) for important clarification on the items. Amendments to a review protocol should be tracked and dated. The copyright for PRISMA-P (including checklist) is held by the PRISMA-P Group and is distributed under a Creative Commons Attribution Licence 4.0.**

*From: Shamseer L, Moher D, Clarke M, Ghersi D, Liberati A, Petticrew M, Shekelle P, Stewart L, PRISMA-P Group. Preferred reporting items for systematic review and meta-analysis protocols (PRISMA-P) 2015: elaboration and explanation. BMJ. 2015 Jan 2;349(jan02 1):g7647.*

## Appendix 2 - General Search Strategy

1. ('primary health care\*' or 'primary care\*' or 'primary health\*' or 'primary health care interven\*' or 'health\* manag\*' or 'care manag\*' or 'primary health interven\*' or 'prevent\* program\*' or 'prevent\* interven\*' or 'early interven\*' or 'primary health\*' or 'strateg\*' or 'health promot\*' or 'comprehensive health\*' or 'community health\*' or 'famil\* health\*' or 'public health\*' or 'health\* system\*' or 'health\* worker\*' or 'health\* profession\*' or 'health\* polic\*' or 'antenatal car\*' or 'antenatal clinic\*' or 'basic health\*').mp. [mp=title, abstract, original title, name of substance word, subject heading word, keyword heading word, protocol supplementary concept word, rare disease supplementary concept word, unique identifier, synonyms]

2. Primary Health Care/ or Public Health/ or Health Policy/ or Health Promotion/ or Health Personnel/ or Developing Countries/

3. 1 {or/and} 2

4. ('partner violen\*' or 'partner abus\*' or 'spouse violen\*' or 'spouse abus\*' or 'partner harm\*' or 'violen\* against wom\*' or 'battered women' or 'dating violen\*' or 'dating abus\*' or 'gender based violen\*' or 'gender based abus\*').mp. [mp=title, abstract, original title, name of substance word, subject heading word, keyword heading word, protocol supplementary concept word, rare disease supplementary concept word, unique identifier, synonyms]

5. Intimate Partner Violence/ or Battered Women/

6. 4 {or/and} 5

7. ('low\* middle\* incom\* countr\*' OR 'low\* incom\* countr\*' OR 'middle\* incom\* countr\*' OR 'underdevelop\* countr\*' OR 'developing countr\*' OR 'third\* world countr\*' OR 'low\* middle\* income\* nation\*' OR 'third\*world\* nation\*' OR 'underdevelop\* nation\*' OR 'less\* developed nation\*' OR 'low\* income nation\*' OR 'developing nation\*' OR 'least\* developed countr\*' OR 'emerg\* countr\*' OR 'less-developed countr\*' OR 'developing world\*' OR 'undeveloped world\*' OR 'emerg\* world' OR 'Latin\* America\*' OR 'Central\* America\*' OR 'Caribbean' OR 'South\* America\*' OR 'Africa\*' OR 'Asia\*' OR 'Pacific' OR 'Middle\* East\*' OR 'Latin\* America\*' OR 'Central America\*' OR 'South America\*' OR 'Africa\*' OR 'Asia\*' OR 'Pacific' OR 'Middle East\*' OR 'Afghanistan' OR 'Albania' OR 'Algeria' OR 'American Samoa' OR 'Angola' OR 'Argentina' OR 'Armenia' OR 'Azerbaijan' OR 'Bangladesh' OR 'Belarus' OR 'Belize' OR 'Benin' OR 'Bhutan' OR 'Bolivia' OR 'Bosnia\*Herzegovina' OR 'Botswana' OR 'Brazil' OR 'Bulgaria' OR 'Burkina Faso' OR 'Burundi' OR 'Cabo Verde' OR 'Cambodia' OR 'Cameroon' OR 'Central African Republic' OR 'Chad' OR 'China' OR 'Colombia' OR 'Comoros' OR 'Congo, Dem\* Rep\*' OR 'Congo, Rep\*' OR 'Costa Rica' OR 'Cote d'Ivoire' OR 'Cuba' OR 'Djibouti' OR 'Dominica' OR 'Dominican Republic' OR 'Ecuador' OR 'Egypt' OR 'El Salvador' OR 'Equatorial Guinea' OR 'Eritrea' OR 'Ethiopia' OR 'Fiji' OR 'Gabon' OR 'Gambia' OR 'Georgia' OR 'Ghana' OR 'Grenada' OR 'Guatemala' OR 'Guinea' OR 'Guinea-Bissau' OR 'Guyana' OR 'Haiti' OR 'Honduras' OR 'India' OR 'Indonesia' OR 'Iran' OR 'Iraq' OR 'Jamaica' OR 'Jordan' OR 'Kazakhstan' OR 'Kenya' OR 'Kiribati' OR 'Korea, Dem\* People's Rep\*' OR 'North Korea' OR 'Kosovo' OR 'Kyrgyz' OR 'Lao' OR 'Lebanon' OR 'Lesotho' OR 'Liberia' OR 'Libya' OR 'Macedonia' OR 'Madagascar' OR 'Malawi' OR 'Malaysia' OR 'Maldives' OR 'Mali' OR 'Marshall Islands' OR 'Mauritania' OR 'Mauritius' OR Mexico' OR 'Micronesia' OR 'Moldova' OR 'Mongolia' OR 'Montenegro' OR 'Morocco' OR 'Mozambique' OR 'Myanmar' OR 'Namibia' OR 'Nepal' OR 'Nicaragua' OR Niger' OR 'Nigeria' OR 'Pakistan' OR 'Palau' OR 'Palestine' OR 'Panama' OR 'Papua New Guinea' OR 'Paraguay' OR 'Peru' OR 'Philippines' OR 'Romania' OR 'Russian Federation' OR 'Russia' OR 'Rwanda' OR 'Samoa' OR 'Sao Tome and Principe' OR 'Senegal' OR 'Serbia' OR 'Sierra Leone' OR 'Solomon Islands' OR 'Somalia' OR 'South Africa' OR 'South Sudan' OR 'Sri Lanka' OR 'St. Lucia' OR 'St. Vincent and the Grenadines' OR 'Sudan' OR 'Suriname' OR 'Swaziland' OR 'Syrian Arab Republic' OR 'Syria' OR 'Tajikistan' OR 'Tanzania' OR 'Thailand' OR 'Timor-Leste' OR 'East Timor' OR 'Togo' OR 'Tonga' OR 'Tunisia' OR 'Turkey' OR 'Turkmenistan' OR 'Tuvalu' OR 'Uganda' OR 'Ukraine' OR 'Uzbekistan' OR 'Vanuatu' OR 'Venezuela' OR 'Vietnam' OR 'West Bank\* Gaza' OR 'Yemen' OR 'Zambia' OR 'Zimbabwe').mp. [mp=title, abstract, original title, name of substance word, subject heading word, keyword heading word, protocol supplementary concept word,

rare disease supplementary concept word, unique identifier, synonyms]

8. Developing countries/ OR Argentina/ OR Bolivia/ OR Brazil/ OR Colombia/ OR Ecuador/ OR Guyana/ OR Paraguay/ OR Peru/ OR Suriname/ OR Venezuela/ OR exp Latin America/ OR exp Caribbean Region/ OR exp Central America/ OR exp Africa/ OR esp Central Asia/ OR exp Northern Asia/ OR Cambodia/ OR Timor-Leste/ OR Indonesia/ OR Laos/ OR Malaysia/ OR Myanmar/ OR Philippines/ OR Thailand/ OR Vietnan/ OR Bangladesh/ OR Buthan/ OR exp India/ OR Nepal/ OR Pakistan/ OR Sri Lanka/ OR Afghanistan/ OR Iran/ OR Iraq/ OR Jordan/ OR Lebanon/ OR Syria/ OR Turkey/ OR Yemen/ OR exp China/ OR Mongolia/ OR Democratic People’s Republic of Korea/ OR Balkan Peninsula/ OR Albania/ OR Bosnia and Herzegovina/ OR Bulgaria/ OR Kosovo/ OR Macedonia/ OR Moldova/ OR Montenegro/ OR exp Republic of Belarus OR Romania/ OR exp Russia/ OR Serbia/ OR Ukraine/ OR exp Transcaucasia/ OR Comoros/ OR Madagascar/ OR Mauritius/ OR Indonesia/ OR Fiji/ OR Papua New Guinea/ OR Vanuatu/ OR Palau/ OR exp Samoa/ OR Tonga/ OR Cuba/ OR Dominica/ OR Dominican Republic/ OR Grenada/ OR Haiti/ OR Jamaica/ OR St. Lucia/ OR St. Vincent and the Grenadines/

9. 7 {or/and} 8

10. 3 and 6 and 9

11. Limit 10 to (full text and yr="2007 -Current" and (English or Portuguese or Spanish))

| Search | Free text words - Portuguese (MeSH terms only available in English)                                                                                                                                                                                                                                                                                                                                                                                                                                                                                                                                                                                                                                                                                                                                                                                                                                                                                                                                                                                                                                                                                                                                                                                          |
|--------|--------------------------------------------------------------------------------------------------------------------------------------------------------------------------------------------------------------------------------------------------------------------------------------------------------------------------------------------------------------------------------------------------------------------------------------------------------------------------------------------------------------------------------------------------------------------------------------------------------------------------------------------------------------------------------------------------------------------------------------------------------------------------------------------------------------------------------------------------------------------------------------------------------------------------------------------------------------------------------------------------------------------------------------------------------------------------------------------------------------------------------------------------------------------------------------------------------------------------------------------------------------|
| #1     | <p>“atenção primár* saúde” OR “cuidado* primár*” OR “saúde primár*” OR “gestão* saúde” OR “manej* saúde” OR “interven* saúde* primár*” OR “program* preven*” OR “interven* preven*” OR “interven* precoce*” OR “estratégi* saúde primár*” OR “promoç* d* saúde” OR “saúde integral*” OR “saúde* comuni*” OR “saúde* família*” OR “saúde públic*” OR “sistema* saúde*” OR “trabalhador* saúde” OR “agente* saúde” OR “profissiona* saúde” OR “polític* saúde” OR “cuidado* pré-nata*” OR “ambulator* pré-nata*” OR “saúde básic*” OR “atenç* básic*” OR “centro* saúde” OR “posto* saúde” OR “unidade* saúde”</p>                                                                                                                                                                                                                                                                                                                                                                                                                                                                                                                                                                                                                                             |
| #2     | <p>“violen* parceir*” OR “abus* parceir*” OR “violen* conjug*” OR “abus* conjug*” OR “agress* parceir*” OR “violen* contra* mulher*” OR “mulher* espancada*” OR “violen* namor*” OR “abus* namor*” OR “violen* gênero” OR “abus* gênero”</p>                                                                                                                                                                                                                                                                                                                                                                                                                                                                                                                                                                                                                                                                                                                                                                                                                                                                                                                                                                                                                 |
| #3     | <p>“país* renda baixa* média*” OR “país* baixa* média* renda*” OR “país* baixa* renda*” OR “país* renda* média” OR “país* subdesenvolv*” OR “país* em desenvolvimento” OR “país* terceiro mundo” OR “naç* renda baixa* média*” OR “naç* terceiro mundo” OR “naç* subdesenvolv*” OR “naç* menos desenvolvid*” OR “naç* baix* desenvolv*” OR “naç* em desenvolvimento” OR “país* menos desenvolvid*” OR “país* emergente*” OR “país* pobre*” OR “naç* pobre*” OR “mundo em desenvolvimento” OR “mundo subdesenvolvido” OR “mundo emergente” OR “naç* emergente* OR “América Latin*” OR "América Central" OR "América do Sul" OR “Carib*” OR “África*” OR “Ásia*” OR “Pacífico*” OR “Oceania” OR "Oriente Médio" OR "Afeganistão" OR "Albânia" OR "Argélia" OR "Samoa Americana" OR "Angola" OR "Argentina" OR "Armênia" OR "Azerbaijão" OR "Bangladesh" OR "Bielorrússia" OR "Belize" OR "Benin" OR "Butão" OR "Bolívia" OR "Bósnia* Herzegovina" OR "Botswana" OR "Brasil" OR "Bulgária" OR “Burkina Faso” OR "Burundi" OR "Cabo Verde" OR "Camboja" OR "Camarões" OR "República Centro-Africana" OR "Chade" OR "China" OR "Colômbia" OR "Comores" OR "Congo, Dem* Rep*” OR "Congo, Rep*” OR "Costa Rica" OR "Costa do Marfim" OR "Cuba" OR "Djibouti” OR</p> |



|                                                                                                                                                                                                                                                                                                                                                                                                                                                                                                                                                                                                                                                                                                                                                                                                                                                                                                                                                                                                                                                                                                                                                                                                                                                                                                                                                                                                                                                                                                                                                                                                                                                                         |
|-------------------------------------------------------------------------------------------------------------------------------------------------------------------------------------------------------------------------------------------------------------------------------------------------------------------------------------------------------------------------------------------------------------------------------------------------------------------------------------------------------------------------------------------------------------------------------------------------------------------------------------------------------------------------------------------------------------------------------------------------------------------------------------------------------------------------------------------------------------------------------------------------------------------------------------------------------------------------------------------------------------------------------------------------------------------------------------------------------------------------------------------------------------------------------------------------------------------------------------------------------------------------------------------------------------------------------------------------------------------------------------------------------------------------------------------------------------------------------------------------------------------------------------------------------------------------------------------------------------------------------------------------------------------------|
| <p>"Dominica" OR "República Dominicana" OR "Equador" OR "Egito" OR "El Salvador" OR "Guiné Equatorial" OR "Eritreia" OR "Etiópia" OR "Fiji" OR "Gabão" OR "Gâmbia" OR "Geórgia" OR "Gana" OR "Granada" OR "Guatemala" OR "Guiné" OR "Guiné-Bissau" OR "Guiana" OR "Haiti" OR "Honduras" OR "Índia" OR "Indonésia" OR "Irã" OR "Iraque" OR "Jamaica" OR "Jordânia" OR "Cazaquistão" OR "Quênia" OR "Kiribati" OR "Coréia, Rep* Dem*" OR "Coréia do Norte" OR "Kosovo" OR "Quirguistão" OR "Laos" OR "Líbano" OR "Lesoto" OR "Libéria" OR "Líbia" OR "Macedônia" OR "Madagascar" OR "Malawi" OR "Malásia" OR "Maldivas" OR "Mali" OR "Ilhas Marshall" OR "Mauritânia" OR "Mauríci*" OR "México" OR "Micronésia" OR "Moldávia" OR "Mongólia" OR "Montenegro" OR "Marrocos" OR "Moçambique" OR "Mianmar" OR "Namíbia" OR "Nepal" OR "Nicarágua" OR Níger " OR "Nigéria" OR "Paquistão" OR "Palau" OR "Panamá" OR "Papua Nova Guiné" OR "Paraguai" OR "Peru" OR "Filipinas" OR "Romênia" OR "Federação Russa" OR "Rússia" OR "Ruanda" OR "Samoa" OR "São Tomé e Príncipe" OR "Senegal" OR "Sérvia" OR "Serra Leoa" OR "Ilhas Salomão" OR "Somália" OR "África do Sul" OR "Sudão do Sul" OR "Sri Lanka" OR "St. Lucia" OR "São. Vincente e Granadinas" OR "Sudão" OR "Suriname" OR "Suazilândia" OR "República Árabe da Síria" OR "Síria" OR "Tajiquistão" OR "Tanzânia" OR "Tailândia" OR "Timor-Leste" OR "Timor* Leste" OR "Togo" OR "Tonga" OR "Tunísia" OR "Turquia" OR "Turcomenistão" OR "Tuvalu" OR "Uganda" OR "Ucrânia" OR "Uzbequistão" OR "Vanuatu" OR "Venezuela" OR "Vietn*" OR "Cisjordânia" OR "Gaza" OR "Palestina" OR "Iêmen" OR "Zâmbia" OR "Zimbábue"</p> |
|-------------------------------------------------------------------------------------------------------------------------------------------------------------------------------------------------------------------------------------------------------------------------------------------------------------------------------------------------------------------------------------------------------------------------------------------------------------------------------------------------------------------------------------------------------------------------------------------------------------------------------------------------------------------------------------------------------------------------------------------------------------------------------------------------------------------------------------------------------------------------------------------------------------------------------------------------------------------------------------------------------------------------------------------------------------------------------------------------------------------------------------------------------------------------------------------------------------------------------------------------------------------------------------------------------------------------------------------------------------------------------------------------------------------------------------------------------------------------------------------------------------------------------------------------------------------------------------------------------------------------------------------------------------------------|

| Search | Free text words - Spanish (MeSH terms only available in English)                                                                                                                                                                                                                                                                                                                                                                                                                                                                                                                                                                                                                                                                                                                                                                                                                                                                                                             |
|--------|------------------------------------------------------------------------------------------------------------------------------------------------------------------------------------------------------------------------------------------------------------------------------------------------------------------------------------------------------------------------------------------------------------------------------------------------------------------------------------------------------------------------------------------------------------------------------------------------------------------------------------------------------------------------------------------------------------------------------------------------------------------------------------------------------------------------------------------------------------------------------------------------------------------------------------------------------------------------------|
| #1     | <p>“atenci* primar* salud” OR “atenci* primar*” OR “cuidado* primar*” OR “salud primar*” OR “gestion* salud” OR “manej* salud” OR “interven* primar* salud*” OR “program* OR interven*” OR “interven* tempran*” OR “estrateg* salud primar*” OR “promoc* salud” OR “salud integral*” OR “salud* comuni*” OR “salud* famili*” OR “salud public*” OR “sistema* salud” OR “trabajad* salud” OR “agente* salud” OR “profession* salud” OR “politic* salud” OR “cuidado prenatal*” OR “clínica* prenatal*” OR “salud basic*” OR “atenci* basic*” OR “primer nivel de atención” OR “centro* de salud” OR “puesto* de salud” OR “posta* médica*”</p>                                                                                                                                                                                                                                                                                                                                |
| #2     | <p>“violen* pareja*” OR “abuso* pareja*” OR “violencia conyug*” OR “abuso conyug*” OR “daño* pareja*” OR “violen* contra la* mujer*” OR “abus* contra la* mujer*” OR “mujer* golpeada*” OR “mujer* maltratada*” OR “violen* contra la* enamora*” OR “abus* contra la* enamora*” OR “violencia de género” OR “abuso de género” OR “violencia de* compañer* íntim*” OR “mujer* violentada*”</p>                                                                                                                                                                                                                                                                                                                                                                                                                                                                                                                                                                                |
| #3     | <p>“país* con ingreso mediano* bajo*” OR “país* con ingreso bajo* OR “país* subdesarrollado*” OR “país* en desarrollo*” OR “país* tercer mundo” OR “nacion* con ingreso mediano* bajo*” OR “nacion* del tercer mundo” OR “nacion* subdesarrollada*” OR “nacion* menos desarroll*” OR “nacion* con bajo desarroll*” OR “nacion* en desarrollo” OR “país* menos desarroll*” OR “país* menos desarroll*” OR “país* emergente*” OR “nacion* emergente*” OR “mundo emergente” OR “mundo subdesarrollado” OR “país* en vías de desarrollo” OR “Caribe” OR “América Latina*” OR “América del Sur” OR “Sudamérica” “África*” OR “Asia*” OR “Pacífico” OR “Oriente Medio” OR “Afganistán” OR “Albania” OR “Argelia” OR “Angola” OR “Argentina” OR “Samoa Americana” OR “Armenia” OR “Azerbaiyán” OR “Bangladesh” OR “Bielorrusia” OR “Belice” OR “Benin” OR “Bolivia” OR “Bosnia* Herzegovina” OR “Botswana” OR “Brasil” OR “Bulgaria” OR “Burkina Faso” OR “Burundi” OR “Bhutan”</p> |

|                                                                                                                                                                                                                                                                                                                                                                                                                                                                                                                                                                                                                                                                                                                                                                                                                                                                                                                                                                                                                                                                                                                                                                                                                                                                                                                                                                                                                                                                                                                                                                                                                                                                                                                                                        |
|--------------------------------------------------------------------------------------------------------------------------------------------------------------------------------------------------------------------------------------------------------------------------------------------------------------------------------------------------------------------------------------------------------------------------------------------------------------------------------------------------------------------------------------------------------------------------------------------------------------------------------------------------------------------------------------------------------------------------------------------------------------------------------------------------------------------------------------------------------------------------------------------------------------------------------------------------------------------------------------------------------------------------------------------------------------------------------------------------------------------------------------------------------------------------------------------------------------------------------------------------------------------------------------------------------------------------------------------------------------------------------------------------------------------------------------------------------------------------------------------------------------------------------------------------------------------------------------------------------------------------------------------------------------------------------------------------------------------------------------------------------|
| <p>OR "Cabo Verde" OR "Camboya" OR "Camerún" OR "República Centroafricana" OR "Chad" OR "China" OR "Costa Rica" OR "Costa de Marfil" OR "Cuba" OR "Djibouti" OR "Dominica" OR "Costa Rica" OR "Colombia" OR "Comoras" OR "Congo, Rep*" OR "República Dominicana" OR "Ecuador" OR "Egipto" OR "El Salvador" OR "Guinea Ecuatorial" OR "Eritrea" OR "Etiopía" OR "Fiji" OR "Gabón" OR "Georgia" OR "Gambia" OR "Ghana" OR "Grenada" OR "Guatemala" OR "Guinea" OR "Guinea-Bissau" OR "Guyana" OR "Haití" OR "Honduras" OR "India" OR "Indonesia" OR "Iran" OR "Irak" OR "Jamaica" OR "Jordania" OR "Kazajstán" OR "Kenia" OR "Kiribati" OR "Corea, República Democrática" OR "Corea del Norte" OR "Kosovo" OR "Laos" OR "Líbano" OR "Lesotho" OR "Liberia" OR "Libia" OR "Macedonia" OR "Madagascar" OR "Malawi" OR "Malasia" OR "Maldivas" OR "Mali" OR "Islas Marshall" OR "Mauritania" OR "Maurici*" OR "México" OR "Micronesia" OR "Moldavia" OR "Mongolia" OR "Montenegro" OR "Marruecos" OR "Mozambique" OR "Myanmar" OR "Namibia" OR "Nepal" OR "Nicaragua" OR "Níger" OR "Nigeria" OR "Pakistán" OR "Palau" OR "Panamá" OR "Papúa Nueva Guinea" OR "Paraguay" OR "Perú" OR "Filipinas" OR "Rumania" OR "Rusia" OR "Rwanda" OR "Samoa" OR "Santo Tomé y Príncipe" OR "Senegal" OR "Serbia" OR "Sierra Leona" OR "Somalia" OR "Sudáfrica" OR "Sudán del Sur" OR "Sri Lanka" OR "St. Lucia" OR "Siria" OR "Tayikistán" OR "Tanzania" OR "Tailandia" OR "Timor Oriental" OR "República Democrática del Congo" OR "Tonga" OR "Túnez" OR "Turquía" OR "Turkmenistán" OR "Tuvalu" OR "Uganda" OR "Ucrania" OR "Uzbekistán" OR "Vanuatu" OR "Venezuela" OR "Vietnam" OR "Cisjordania*" OR "Gaza" OR "Palestina" OR "Yemen" OR "Zambia" OR "Zimbabwe"</p> |
|--------------------------------------------------------------------------------------------------------------------------------------------------------------------------------------------------------------------------------------------------------------------------------------------------------------------------------------------------------------------------------------------------------------------------------------------------------------------------------------------------------------------------------------------------------------------------------------------------------------------------------------------------------------------------------------------------------------------------------------------------------------------------------------------------------------------------------------------------------------------------------------------------------------------------------------------------------------------------------------------------------------------------------------------------------------------------------------------------------------------------------------------------------------------------------------------------------------------------------------------------------------------------------------------------------------------------------------------------------------------------------------------------------------------------------------------------------------------------------------------------------------------------------------------------------------------------------------------------------------------------------------------------------------------------------------------------------------------------------------------------------|

This search strategy can be adapted and modified according to each electronic database.

**Appendix 3 -PRISMA Flow Diagram: flow of information through different phases of a systematic review**



Source: Moher D, Liberati A, Tetzlaff J, et al. Preferred reporting items for systematic reviews and meta-analyses: the PRISMA statement. PLoS Med 2009;6:e1000097 doi:10.1371/journal.pmed.1000097 [published Online: 21 July 2009].

## Appendix 4 - Data Items

### 1. General Information and characteristics of the studies

- a. Author's name
- b. Journal
- c. Year of publication
- d. Country of the intervention
- e. Context (urban/rural)
- f. Type of service/setting
- g. Participants (e.g. workers, users - victims, family members, perpetrators)

### 2. Methodology

- a. Study design
- b. Type of intervention
- c. Sample/number of participants
- d. Year(s) when intervention was conducted
- e. Data collection
- f. Measures
- g. Analysis
- h. Ethics clearance

### 3. Impacts and outcomes of the intervention for survivors:

- a. IPV rates
- b. health (e.g. physical, mental)
- c. safety (e.g. safety plans)
- d. wellbeing (e.g. quality of life)
- e. children (e.g. children's health and wellbeing)
- f. Other Impacts and outcomes (if described)
- g. Barriers and facilitators for survivors (if investigated)

### 4. Impacts and outcomes of the intervention for PHC workers' practices:

- a. Types of workers (e.g. nurses, community health workers, receptionists)
- b. Worker's role in the intervention
- c. Measures of impacts and outcomes concerned to workers
- d. Barriers and facilitators for workers (if described)

### 5. Role of the PHC services and public health systems to improve survivors' healthcare:

- a. Measures of impacts and outcomes of the intervention for services/systems
- b. Impacts and outcomes of the intervention for policies and organizational structure
- c. Articulation with other levels of care in the healthcare system (e.g. hospital, emergency, etc.)
- d. Articulation with other sectors beyond public health (e.g. police, justice, housing, etc.)
- e. Costs
- f. Sustainability
- g. Barriers and facilitators for services/systems (if described)

### 6. Other relevant information
