# Supplementary material for: Voices from low-income and middle-income countries: a systematic review protocol of primary healthcare interventions within public health systems addressing intimate partner violence against women
Source: PubMed Central journal article supplement — BMJ Open. 2018 Mar 25;8(3):e019266. doi: 10.1136/bmjopen-2017-019266 (PMC5875662; doi:10.1136/bmjopen-2017-019266), 2018-03-25
Supplement: bmjopen-2017-019266supp002.pdf [file bmjopen-2017-019266supp002.pdf]

## Appendix 2 - General Search Strategy

1. ('primary health care\*' or 'primary care\*' or 'primary health\*' or 'primary health care interven\*' or 'health\* manag\*' or 'care manag\*' or 'primary health interven\*' or 'prevent\* program\*' or 'prevent\* interven\*' or 'early interven\*' or 'primary health\*' or 'strateg\*' or 'health promot\*' or 'comprehensive health\*' or 'community health\*' or 'famil\* health\*' or 'public health\*' or 'health\* system\*' or 'health\* worker\*' or 'health\* profession\*' or 'health\* polic\*' or 'antenatal car\*' or 'antenatal clinic\*' or 'basic health\*').mp. [mp=title, abstract, original title, name of substance word, subject heading word, keyword heading word, protocol supplementary concept word, rare disease supplementary concept word, unique identifier, synonyms]

2. Primary Health Care/ or Public Health/ or Health Policy/ or Health Promotion/ or Health Personnel/ or Developing Countries/

3. 1 {or/and} 2

4. ('partner violen\*' or 'partner abus\*' or 'spouse violen\*' or 'spouse abus\*' or 'partner harm\*' or 'violen\* against wom\*' or 'battered women' or 'dating violen\*' or 'dating abus\*' or 'gender based violen\*' or 'gender based abus\*').mp. [mp=title, abstract, original title, name of substance word, subject heading word, keyword heading word, protocol supplementary concept word, rare disease supplementary concept word, unique identifier, synonyms]

5. Intimate Partner Violence/ or Battered Women/

6. 4 {or/and} 5

7. ('low\* middle\* incom\* countr\*' OR 'low\* incom\* countr\*' OR 'middle\* incom\* countr\*' OR 'underdevelop\* countr\*' OR 'developing countr\*' OR 'third\* world countr\*' OR 'low\* middle\* income\* nation\*' OR 'third\*world\* nation\*' OR 'underdevelop\* nation\*' OR 'less\* developed nation\*' OR 'low\* income nation\*' OR 'developing nation\*' OR 'least\* developed countr\*' OR 'emerg\* countr\*' OR 'less-developed countr\*' OR 'developing world\*' OR 'undeveloped world\*' OR 'emerg\* world' OR 'Latin\* America\*' OR 'Central\* America\*' OR 'Caribbean' OR 'South\* America\*' OR 'Africa\*' OR 'Asia\*' OR 'Pacific' OR 'Middle\* East\*' OR 'Latin\* America\*' OR 'Central America\*' OR 'South America\*' OR 'Africa\*' OR 'Asia\*' OR 'Pacific' OR 'Middle East\*' OR 'Afghanistan' OR 'Albania' OR 'Algeria' OR 'American Samoa' OR 'Angola' OR 'Argentina' OR 'Armenia' OR 'Azerbaijan' OR 'Bangladesh' OR 'Belarus' OR 'Belize' OR 'Benin' OR 'Bhutan' OR 'Bolivia' OR 'Bosnia\*Herzegovina' OR 'Botswana' OR 'Brazil' OR 'Bulgaria' OR 'Burkina Faso' OR 'Burundi' OR 'Cabo Verde' OR 'Cambodia' OR 'Cameroon' OR 'Central African Republic' OR 'Chad' OR 'China' OR 'Colombia' OR 'Comoros' OR 'Congo, Dem\* Rep\*' OR 'Congo, Rep\*' OR 'Costa Rica' OR 'Cote d'Ivoire' OR 'Cuba' OR 'Djibouti' OR 'Dominica' OR 'Dominican Republic' OR 'Ecuador' OR 'Egypt' OR 'El Salvador' OR 'Equatorial Guinea' OR 'Eritrea' OR 'Ethiopia' OR 'Fiji' OR 'Gabon' OR 'Gambia' OR 'Georgia' OR 'Ghana' OR 'Grenada' OR 'Guatemala' OR 'Guinea' OR 'Guinea-Bissau' OR 'Guyana' OR 'Haiti' OR 'Honduras' OR 'India' OR 'Indonesia' OR 'Iran' OR 'Iraq' OR 'Jamaica' OR 'Jordan' OR 'Kazakhstan' OR 'Kenya' OR 'Kiribati' OR 'Korea, Dem\* People's Rep\*' OR 'North Korea' OR 'Kosovo' OR 'Kyrgyz' OR 'Lao' OR 'Lebanon' OR 'Lesotho' OR 'Liberia' OR 'Libya' OR 'Macedonia' OR 'Madagascar' OR 'Malawi' OR 'Malaysia' OR 'Maldives' OR 'Mali' OR 'Marshall Islands' OR 'Mauritania' OR 'Mauritius' OR Mexico' OR 'Micronesia' OR 'Moldova' OR 'Mongolia' OR 'Montenegro' OR 'Morocco' OR 'Mozambique' OR 'Myanmar' OR 'Namibia' OR 'Nepal' OR 'Nicaragua' OR Niger' OR 'Nigeria' OR 'Pakistan' OR 'Palau' OR 'Palestine' OR 'Panama' OR 'Papua New Guinea' OR 'Paraguay' OR 'Peru' OR 'Philippines' OR 'Romania' OR 'Russian Federation' OR 'Russia' OR 'Rwanda' OR 'Samoa' OR 'Sao Tome and Principe' OR 'Senegal' OR 'Serbia' OR 'Sierra Leone' OR 'Solomon Islands' OR 'Somalia' OR 'South Africa' OR 'South Sudan' OR 'Sri Lanka' OR 'St. Lucia' OR 'St. Vincent and the Grenadines' OR 'Sudan' OR 'Suriname' OR 'Swaziland' OR 'Syrian Arab Republic' OR 'Syria' OR 'Tajikistan' OR 'Tanzania' OR 'Thailand' OR 'Timor-Leste' OR 'East Timor' OR 'Togo' OR 'Tonga' OR 'Tunisia' OR 'Turkey' OR 'Turkmenistan' OR 'Tuvalu' OR 'Uganda' OR 'Ukraine' OR 'Uzbekistan' OR 'Vanuatu' OR 'Venezuela' OR 'Vietnam' OR 'West Bank\* Gaza' OR 'Yemen' OR 'Zambia' OR 'Zimbabwe').mp. [mp=title, abstract, original title, name of substance word, subject heading word, keyword heading word, protocol supplementary concept word,

rare disease supplementary concept word, unique identifier, synonyms]

8. Developing countries/ OR Argentina/ OR Bolivia/ OR Brazil/ OR Colombia/ OR Ecuador/ OR Guyana/ OR Paraguay/ OR Peru/ OR Suriname/ OR Venezuela/ OR exp Latin America/ OR exp Caribbean Region/ OR exp Central America/ OR exp Africa/ OR esp Central Asia/ OR exp Northern Asia/ OR Cambodia/ OR Timor-Leste/ OR Indonesia/ OR Laos/ OR Malaysia/ OR Myanmar/ OR Philippines/ OR Thailand/ OR Vietnan/ OR Bangladesh/ OR Buthan/ OR exp India/ OR Nepal/ OR Pakistan/ OR Sri Lanka/ OR Afghanistan/ OR Iran/ OR Iraq/ OR Jordan/ OR Lebanon/ OR Syria/ OR Turkey/ OR Yemen/ OR exp China/ OR Mongolia/ OR Democratic People’s Republic of Korea/ OR Balkan Peninsula/ OR Albania/ OR Bosnia and Herzegovina/ OR Bulgaria/ OR Kosovo/ OR Macedonia/ OR Moldova/ OR Montenegro/ OR exp Republic of Belarus OR Romania/ OR exp Russia/ OR Serbia/ OR Ukraine/ OR exp Transcaucasia/ OR Comoros/ OR Madagascar/ OR Mauritius/ OR Indonesia/ OR Fiji/ OR Papua New Guinea/ OR Vanuatu/ OR Palau/ OR exp Samoa/ OR Tonga/ OR Cuba/ OR Dominica/ OR Dominican Republic/ OR Grenada/ OR Haiti/ OR Jamaica/ OR St. Lucia/ OR St. Vincent and the Grenadines/

9. 7 {or/and} 8

10. 3 and 6 and 9

11. Limit 10 to (full text and yr="2007 -Current" and (English or Portuguese or Spanish))

| Search | Free text words - Portuguese (MeSH terms only available in English)                                                                                                                                                                                                                                                                                                                                                                                                                                                                                                                                                                                                                                                                                                                                                                                                                                                                                                                                                                                                                                                                                                                                                                                          |
|--------|--------------------------------------------------------------------------------------------------------------------------------------------------------------------------------------------------------------------------------------------------------------------------------------------------------------------------------------------------------------------------------------------------------------------------------------------------------------------------------------------------------------------------------------------------------------------------------------------------------------------------------------------------------------------------------------------------------------------------------------------------------------------------------------------------------------------------------------------------------------------------------------------------------------------------------------------------------------------------------------------------------------------------------------------------------------------------------------------------------------------------------------------------------------------------------------------------------------------------------------------------------------|
| #1     | <p>“atenção primár* saúde” OR “cuidado* primár*” OR “saúde primár*” OR “gestão* saúde” OR “manej* saúde” OR “interven* saúde* primár*” OR “program* preven*” OR “interven* preven*” OR “interven* precoce*” OR “estratégi* saúde primár*” OR “promoç* d* saúde” OR “saúde integral*” OR “saúde* comuni*” OR “saúde* família*” OR “saúde públic*” OR “sistema* saúde*” OR “trabalhador* saúde” OR “agente* saúde” OR “profissiona* saúde” OR “polític* saúde” OR “cuidado* pré-nata*” OR “ambulator* pré-nata*” OR “saúde básic*” OR “atenç* básic*” OR “centro* saúde” OR “posto* saúde” OR “unidade* saúde”</p>                                                                                                                                                                                                                                                                                                                                                                                                                                                                                                                                                                                                                                             |
| #2     | <p>“violen* parceir*” OR “abus* parceir*” OR “violen* conjug*” OR “abus* conjug*” OR “agress* parceir*” OR “violen* contra* mulher*” OR “mulher* espancada*” OR “violen* namor*” OR “abus* namor*” OR “violen* gênero” OR “abus* gênero”</p>                                                                                                                                                                                                                                                                                                                                                                                                                                                                                                                                                                                                                                                                                                                                                                                                                                                                                                                                                                                                                 |
| #3     | <p>“país* renda baixa* média*” OR “país* baixa* média* renda*” OR “país* baixa* renda*” OR “país* renda* média” OR “país* subdesenvolv*” OR “país* em desenvolvimento” OR “país* terceiro mundo” OR “naç* renda baixa* média*” OR “naç* terceiro mundo” OR “naç* subdesenvolv*” OR “naç* menos desenvolvid*” OR “naç* baix* desenvolv*” OR “naç* em desenvolvimento” OR “país* menos desenvolvid*” OR “país* emergente*” OR “país* pobre*” OR “naç* pobre*” OR “mundo em desenvolvimento” OR “mundo subdesenvolvido” OR “mundo emergente” OR “naç* emergente* OR “América Latin*” OR "América Central" OR "América do Sul" OR “Carib*” OR “África*” OR “Ásia*” OR “Pacífico*” OR “Oceania” OR "Oriente Médio" OR "Afeganistão" OR "Albânia" OR "Argélia" OR "Samoa Americana" OR "Angola" OR "Argentina" OR "Armênia" OR "Azerbaijão" OR "Bangladesh" OR "Bielorrússia" OR "Belize" OR "Benin" OR "Butão" OR "Bolívia" OR "Bósnia* Herzegovina" OR "Botswana" OR "Brasil" OR "Bulgária" OR “Burkina Faso” OR "Burundi" OR "Cabo Verde" OR "Camboja" OR "Camarões" OR "República Centro-Africana" OR "Chade" OR "China" OR "Colômbia" OR "Comores" OR "Congo, Dem* Rep*” OR "Congo, Rep*” OR "Costa Rica" OR "Costa do Marfim" OR "Cuba" OR "Djibouti” OR</p> |

|                                                                                                                                                                                                                                                                                                                                                                                                                                                                                                                                                                                                                                                                                                                                                                                                                                                                                                                                                                                                                                                                                                                                                                                                                                                                                                                                                                                                                                                                                                                                                                                                                                                                        |
|------------------------------------------------------------------------------------------------------------------------------------------------------------------------------------------------------------------------------------------------------------------------------------------------------------------------------------------------------------------------------------------------------------------------------------------------------------------------------------------------------------------------------------------------------------------------------------------------------------------------------------------------------------------------------------------------------------------------------------------------------------------------------------------------------------------------------------------------------------------------------------------------------------------------------------------------------------------------------------------------------------------------------------------------------------------------------------------------------------------------------------------------------------------------------------------------------------------------------------------------------------------------------------------------------------------------------------------------------------------------------------------------------------------------------------------------------------------------------------------------------------------------------------------------------------------------------------------------------------------------------------------------------------------------|
| <p>"Dominica" OR "República Dominicana" OR "Equador" OR "Egito" OR "El Salvador" OR "Guiné Equatorial" OR "Eritreia" OR "Etiópia" OR "Fiji" OR "Gabão" OR "Gâmbia" OR "Geórgia" OR "Gana" OR "Granada" OR "Guatemala" OR "Guiné" OR "Guiné-Bissau" OR "Guiana" OR "Haiti" OR "Honduras" OR "Índia" OR "Indonésia" OR "Irã" OR "Iraque" OR "Jamaica" OR "Jordânia" OR "Cazaquistão" OR "Quênia" OR "Kiribati" OR "Coréia, Rep* Dem*" OR "Coréia do Norte" OR "Kosovo" OR "Quirguistão" OR "Laos" OR "Líbano" OR "Lesoto" OR "Libéria" OR "Líbia" OR "Macedônia" OR "Madagascar" OR "Malawi" OR "Malásia" OR "Maldivas" OR "Mali" OR "Ilhas Marshall" OR "Mauritânia" OR "Mauríci*" OR "México" OR "Micronésia" OR "Moldávia" OR "Mongólia" OR "Montenegro" OR "Marrocos" OR "Moçambique" OR "Mianmar" OR "Namíbia" OR "Nepal" OR "Nicarágua" OR Níger " OR "Nigéria" OR "Paquistão" OR "Palau" OR "Panamá" OR "Papua Nova Guiné" OR "Paraguai" OR "Peru" OR "Filipinas" OR "Romênia" OR "Federação Russa" OR "Rússia" OR "Ruanda" OR "Samoa" OR "São Tomé e Príncipe" OR "Senegal" OR "Sérvia" OR "Serra Leoa" OR "Ilhas Salomão" OR "Somália" OR "África do Sul" OR "Sudão do Sul" OR "Sri Lanka" OR "St. Lucia" OR "São. Vicente e Granadinas" OR "Sudão" OR "Suriname" OR "Suazilândia" OR "República Árabe da Síria" OR "Síria" OR "Tajiquistão" OR "Tanzânia" OR "Tailândia" OR "Timor-Leste" OR "Timor* Leste" OR "Togo" OR "Tonga" OR "Tunísia" OR "Turquia" OR "Turcomenistão" OR "Tuvalu" OR "Uganda" OR "Ucrânia" OR "Uzbequistão" OR "Vanuatu" OR "Venezuela" OR "Vietn*" OR "Cisjordânia" OR "Gaza" OR "Palestina" OR "Iêmen" OR "Zâmbia" OR "Zimbábue"</p> |
|------------------------------------------------------------------------------------------------------------------------------------------------------------------------------------------------------------------------------------------------------------------------------------------------------------------------------------------------------------------------------------------------------------------------------------------------------------------------------------------------------------------------------------------------------------------------------------------------------------------------------------------------------------------------------------------------------------------------------------------------------------------------------------------------------------------------------------------------------------------------------------------------------------------------------------------------------------------------------------------------------------------------------------------------------------------------------------------------------------------------------------------------------------------------------------------------------------------------------------------------------------------------------------------------------------------------------------------------------------------------------------------------------------------------------------------------------------------------------------------------------------------------------------------------------------------------------------------------------------------------------------------------------------------------|

| Search | Free text words - Spanish (MeSH terms only available in English)                                                                                                                                                                                                                                                                                                                                                                                                                                                                                                                                                                                                                                                                                                                                                                                                                                                                                                             |
|--------|------------------------------------------------------------------------------------------------------------------------------------------------------------------------------------------------------------------------------------------------------------------------------------------------------------------------------------------------------------------------------------------------------------------------------------------------------------------------------------------------------------------------------------------------------------------------------------------------------------------------------------------------------------------------------------------------------------------------------------------------------------------------------------------------------------------------------------------------------------------------------------------------------------------------------------------------------------------------------|
| #1     | <p>“atenci* primar* salud” OR “atenci* primar*” OR “cuidado* primar*” OR “salud primar*” OR “gestion* salud” OR “manej* salud” OR “interven* primar* salud*” OR “program* OR interven*” OR “interven* tempran*” OR “estrateg* salud primar*” OR “promoc* salud” OR “salud integral*” OR “salud* comuni*” OR “salud* famili*” OR “salud public*” OR “sistema* salud” OR “trabajad* salud” OR “agente* salud” OR “profession* salud” OR “politic* salud” OR “cuidado prenatal*” OR “clínica* prenatal*” OR “salud basic*” OR “atenci* basic*” OR “primer nivel de atención” OR “centro* de salud” OR “puesto* de salud” OR “posta* médica”</p>                                                                                                                                                                                                                                                                                                                                 |
| #2     | <p>“violen* pareja*” OR “abuso* pareja*” OR “violencia conyug*” OR “abuso conyug*” OR “daño* pareja*” OR “violen* contra la* mujer*” OR “abus* contra la* mujer*” OR “mujer* golpeada*” OR “mujer* maltratada*” OR “violen* contra la* enamora*” OR “abus* contra la* enamora*” OR “violencia de género” OR “abuso de género” OR “violencia de* compañer* íntim*” OR “mujer* violentada*”</p>                                                                                                                                                                                                                                                                                                                                                                                                                                                                                                                                                                                |
| #3     | <p>“país* con ingreso mediano* bajo*” OR “país* con ingreso bajo* OR “país* subdesarrollado*” OR “país* en desarrollo*” OR “país* tercer mundo” OR “nacion* con ingreso mediano* bajo*” OR “nacion* del tercer mundo” OR “nacion* subdesarrollada*” OR “nacion* menos desarroll*” OR “nacion* con bajo desarroll*” OR “nacion* en desarrollo” OR “país* menos desarroll*” OR “país* menos desarroll*” OR “país* emergente*” OR “nacion* emergente*” OR “mundo emergente” OR “mundo subdesarrollado” OR “país* en vías de desarrollo” OR “Caribe” OR “América Latina*” OR “América del Sur” OR “Sudamérica” “África*” OR “Asia*” OR “Pacífico” OR “Oriente Medio” OR “Afganistán” OR “Albania” OR “Argelia” OR “Angola” OR “Argentina” OR “Samoa Americana” OR “Armenia” OR “Azerbaiyán” OR “Bangladesh” OR “Bielorrusia” OR “Belice” OR “Benin” OR “Bolivia” OR “Bosnia* Herzegovina” OR “Botswana” OR “Brasil” OR “Bulgaria” OR “Burkina Faso” OR “Burundi” OR “Bhutan”</p> |

OR "Cabo Verde" OR "Camboya" OR "Camerún" OR "República Centroafricana"  
OR "Chad" OR "China" OR "Costa Rica" OR "Costa de Marfil" OR "Cuba" OR  
"Djibouti" OR "Dominica" OR "Costa Rica" OR "Colombia" OR "Comoras" OR "Congo,  
Rep\*" OR "República Dominicana" OR "Ecuador" OR "Egipto" OR "El Salvador" OR  
"Guinea Ecuatorial" OR "Eritrea" OR "Etiopía" OR "Fiji" OR "Gabón" OR "Georgia"  
OR "Gambia" OR "Ghana" OR "Grenada" OR "Guatemala" OR "Guinea" OR "Guinea-  
Bissau" OR "Guyana" OR "Haití" OR "Honduras" OR "India" OR "Indonesia" OR "Iran"  
OR "Irak" OR "Jamaica" OR "Jordania" OR "Kazajstán" OR "Kenia" OR "Kiribati" OR  
"Corea, República Democrática" OR "Corea del Norte" OR "Kosovo" OR "Laos" OR  
"Líbano" OR "Lesotho" OR "Liberia" OR "Libia" OR "Macedonia" OR "Madagascar"  
OR "Malawi" OR "Malasia" OR "Maldivas" OR "Mali" OR "Islas Marshall" OR  
"Mauritania" OR "Maurici\*" OR "México" OR "Micronesia" OR "Moldavia" OR  
"Mongolia" OR "Montenegro" OR "Marruecos" OR "Mozambique" OR "Myanmar" OR  
"Namibia" OR "Nepal" OR "Nicaragua" OR "Níger" OR "Nigeria" OR "Pakistán" OR  
"Palau" OR "Panamá" OR "Papúa Nueva Guinea" OR "Paraguay" OR "Perú" OR  
"Filipinas" OR "Rumania" OR "Rusia" OR "Rwanda" OR "Samoa" OR "Santo Tomé y  
Príncipe" OR "Senegal" OR "Serbia" OR "Sierra Leona" OR "Somalia" OR "Sudáfrica"  
OR "Sudán del Sur" OR "Sri Lanka" OR "St. Lucia" OR "Siria" OR "Tayikistán" OR  
"Tanzania" OR "Tailandia" OR "Timor Oriental" OR "República Democrática del  
Congo" OR "Tonga" OR "Túnez" OR "Turquía" OR "Turkmenistán" OR "Tuvalu" OR  
"Uganda" OR "Ucrania" OR "Uzbekistán" OR "Vanuatu" OR "Venezuela" OR  
"Vietnam" OR "Cisjordania\*" OR "Gaza" OR "Palestina" OR "Yemen" OR "Zambia"  
OR "Zimbabwe"

This search strategy can be adapted and modified according to each electronic database.
