# Supplementary material for: Voices from low-income and middle-income countries: a systematic review protocol of primary healthcare interventions within public health systems addressing intimate partner violence against women
Source: PubMed Central journal article supplement — BMJ Open. 2018 Mar 25;8(3):e019266. doi: 10.1136/bmjopen-2017-019266 (PMC5875662; doi:10.1136/bmjopen-2017-019266), 2018-03-25
Supplement: bmjopen-2017-019266supp003.pdf [file bmjopen-2017-019266supp003.pdf]

**Appendix 3 -PRISMA Flow Diagram: flow of information through different phases of a systematic review**

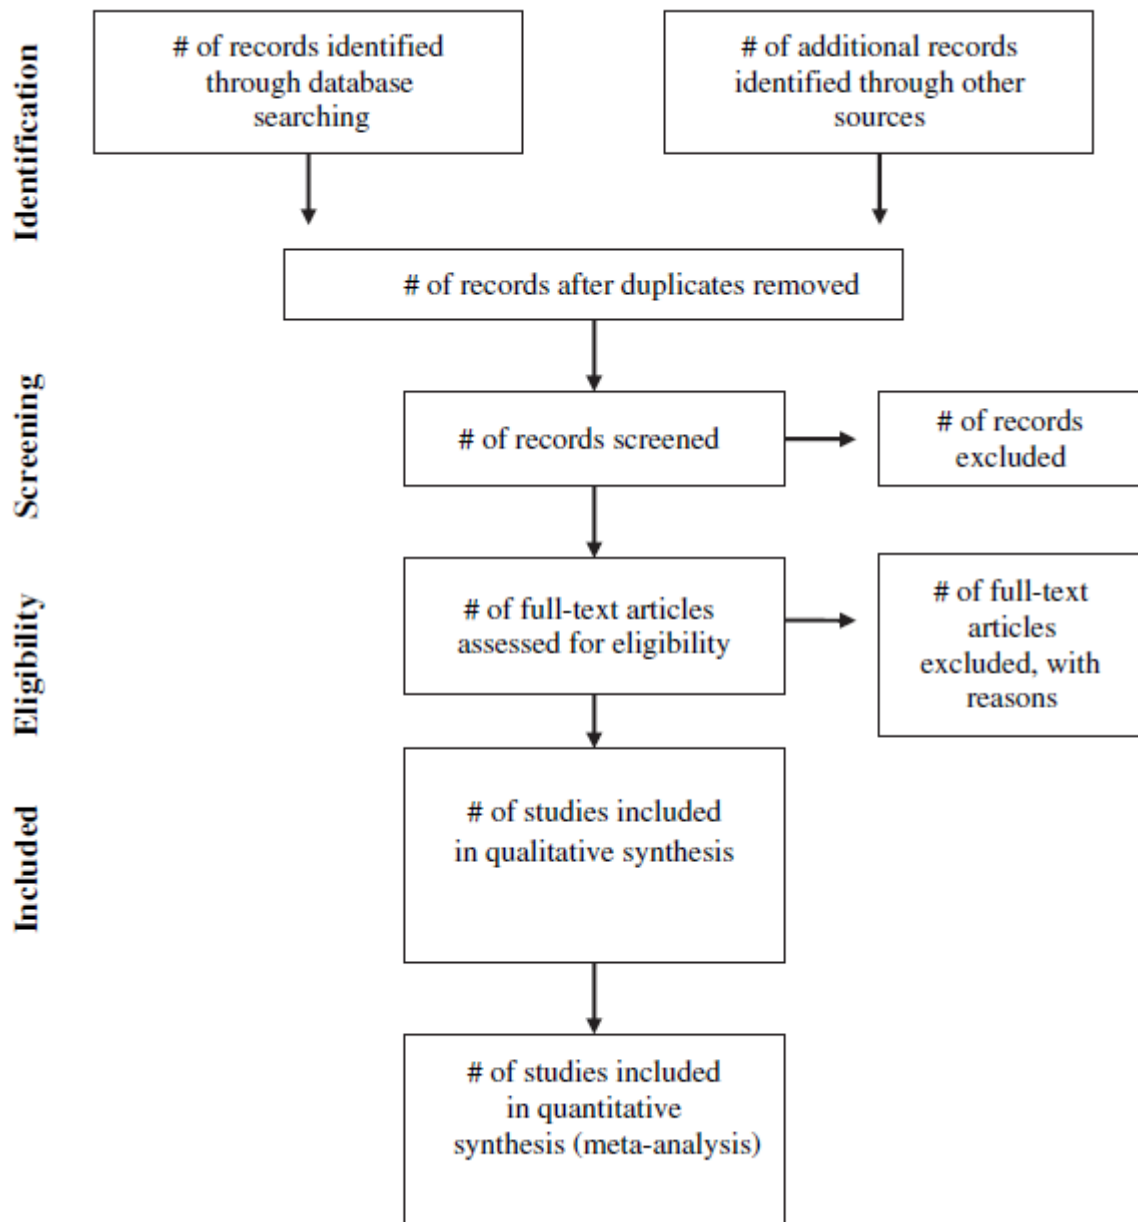

Source: Moher D, Liberati A, Tetzlaff J, et al. Preferred reporting items for systematic reviews and meta-analyses: the PRISMA statement. PLoS Med 2009;6:e1000097 doi:10.1371/journal.pmed.1000097 [published Online: 21 July 2009].
