# Supplementary material for: Voices from low-income and middle-income countries: a systematic review protocol of primary healthcare interventions within public health systems addressing intimate partner violence against women
Source: PubMed Central journal article supplement — BMJ Open. 2018 Mar 25;8(3):e019266. doi: 10.1136/bmjopen-2017-019266 (PMC5875662; doi:10.1136/bmjopen-2017-019266), 2018-03-25
Supplement: bmjopen-2017-019266supp004.pdf [file bmjopen-2017-019266supp004.pdf]

## Appendix 4 - Data Items

### 1. General Information and characteristics of the studies

- a. Author's name
- b. Journal
- c. Year of publication
- d. Country of the intervention
- e. Context (urban/rural)
- f. Type of service/setting
- g. Participants (e.g. workers, users - victims, family members, perpetrators)

### 2. Methodology

- a. Study design
- b. Type of intervention
- c. Sample/number of participants
- d. Year(s) when intervention was conducted
- e. Data collection
- f. Measures
- g. Analysis
- h. Ethics clearance

### 3. Impacts and outcomes of the intervention for survivors:

- a. IPV rates
- b. health (e.g. physical, mental)
- c. safety (e.g. safety plans)
- d. wellbeing (e.g. quality of life)
- e. children (e.g. children's health and wellbeing)
- f. Other Impacts and outcomes (if described)
- g. Barriers and facilitators for survivors (if investigated)

### 4. Impacts and outcomes of the intervention for PHC workers' practices:

- a. Types of workers (e.g. nurses, community health workers, receptionists)
- b. Worker's role in the intervention
- c. Measures of impacts and outcomes concerned to workers
- d. Barriers and facilitators for workers (if described)

### 5. Role of the PHC services and public health systems to improve survivors' healthcare:

- a. Measures of impacts and outcomes of the intervention for services/systems
- b. Impacts and outcomes of the intervention for policies and organizational structure
- c. Articulation with other levels of care in the healthcare system (e.g. hospital, emergency, etc.)
- d. Articulation with other sectors beyond public health (e.g. police, justice, housing, etc.)
- e. Costs
- f. Sustainability
- g. Barriers and facilitators for services/systems (if described)

### 6. Other relevant information
